# Supplementary material for: Smaller, faster, better: modular synthesis of unsymmetrical ammonium salt-tagged NHC–gold(i) complexes and their application as recyclable catalysts in water
Source: Royal Society of Chemistry journal article supplement (doi:10.1039/c5ob01286d), 2015-01-01

## Smaller, faster, better: Modular synthesis of unsymmetrical ammonium salt-tagged NHC-gold(I) complexes and their application as recyclable catalysts in water

Katrin Belger and Norbert Krause\*

Organic Chemistry, Dortmund University of Technology, Otto-Hahn-Strasse 6, D-44227 Dortmund, Germany

### Supporting Information

#### Table of Content

|                                                         |       |
|---------------------------------------------------------|-------|
| 1. Synthesis of Ammonium Salt-tagged NHC Gold Complexes | SI-2  |
| 2. Gold-catalyzed Cyclization of Carboxylic Acids       | SI-8  |
| 3. Gold-catalyzed Cyclization of Amides                 | SI-10 |
| 4. Synthesis of 2- <i>epi</i> -Clausemarine A           | SI-12 |
| 5. NMR-spectra                                          | SI-16 |

**General Methods.** Unless otherwise noted, materials were obtained from commercial suppliers and were used without further purification. Dry  $\text{CH}_2\text{Cl}_2$  and MeCN were taken from the Solvent Purification System MB SPS 800 from MBraun. Dry MeOH was purchased from Acros Organics. 1M Triethylammonium acetate buffer solution was acquired from Merck Millipore. All other solvents were used at technical grade. NHC-AuCl complexes were synthesized using  $\text{Au}(\text{SMe}_2)\text{Cl}$  from Sigma Aldrich. IR spectra were recorded on a FT-IR spectrometer. As internal standard for  $^1\text{H}$  and  $^{13}\text{C}$  NMR the signal of the corresponding non-deuterated solvent was used. Melting points were obtained without correction. Column chromatography was performed with silica 60 (40-63  $\mu\text{m}$ ) from Macherey-Nagel.

## 1. Synthesis of Ammonium Salt-tagged NHC-Gold Complexes

### (4-(Chloromethyl)phenyl)methanol (**6**)

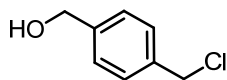

Methyl 4-(chloromethyl)benzoate **5** (5 g, 27.08 mmol) was dissolved in CH<sub>2</sub>Cl<sub>2</sub> (160 mL) under an Ar atmosphere and cooled down to -78 °C. Then, DIBAL-H (89.37 mL, 1 M in hexane) was added dropwise and the solution was warmed up to 0 °C. The reaction mixture was carefully quenched, and the white precipitate was dissolved by adding conc. HCl. The phases were separated, and the aqueous phase was extracted several times with CH<sub>2</sub>Cl<sub>2</sub>. The combined organic phases were washed with brine, dried with MgSO<sub>4</sub> and filtered. The solvent was evaporated to give **6** as white solid (4.08 g, 26.05 mmol, 96%). MP: 59.6 °C; <sup>1</sup>H NMR (300 MHz, CDCl<sub>3</sub>) δ 7.37 (m, 4H), 4.67 (s, 2H), 4.60 (s, 2H), 2.16 (s, 1H); <sup>13</sup>C NMR (75 MHz, CDCl<sub>3</sub>): δ = 141.2, 136.9, 128.9, 127.4, 64.9, 46.1. Known compound.<sup>[1]</sup>

### 2-((4-(Chloromethyl)benzyl)oxy)tetrahydro-2H-pyran (**3**):

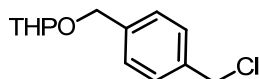

Compound **6** (4.08 g, 26.05 mmol) was dissolved in dry CH<sub>2</sub>Cl<sub>2</sub> (130 mL) under an Ar atmosphere. Then PPTS (327 mg, 1.30 mmol) and DHP (3.53 mL, 39.08 mmol) were added. The mixture was stirred overnight at room temp., then aqueous NaHCO<sub>3</sub> was added, and the phases were separated. The aqueous phase was extracted several times with CH<sub>2</sub>Cl<sub>2</sub>. The combined organic phases were washed with brine, and dried with MgSO<sub>4</sub>, and the solvent was removed in vacuo. The residue was purified by column chromatography (SiO<sub>2</sub>;EtOAc/cyclohexane, 1:6) to give **3** (3.93 g, 16.33 mmol, 63%) as a colorless oil. <sup>1</sup>H NMR (300 MHz, CDCl<sub>3</sub>) δ 7.38 (s, 4H), 4.80 (d, *J* = 12.4 Hz, 1H), 4.72 (t, *J* = 3.5 Hz, 1H), 4.60 (s, 2H), 4.52 (d, *J* = 12.4 Hz, 1H), 3.93 (ddd, *J* = 11.2, 8.1, 3.5 Hz, 1H), 3.53-3.60 (m, 1H), 1.52-1.96 (m, 6H); <sup>13</sup>C NMR (75 MHz, CDCl<sub>3</sub>) δ 138.8, 136.8, 128.7, 128.2, 97.9, 68.4, 62.2, 46.2, 30.6, 25.5, 19.4. Known compound.<sup>[2]</sup>

### 3-(4-(Hydroxymethyl)benzyl)-1-mesityl-1H-imidazol-3-ium chloride (**7a**):

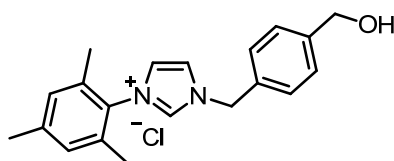

Compound **3** (2 g, 8.31 mmol) was dissolved in MeCN (30 mL) and mesityl imidazole **2a** (1.55 g, 8.31 mmol) was added. The solution was stirred under reflux overnight. Then HCl (10 mL, 12.5 mmol, 1.25 M solution in EtOH) was added and the solution was stirred for 15 min. After the reaction mixture cooled down to room temperature, the solvent was evaporated and the residue was dissolved in CH<sub>2</sub>Cl<sub>2</sub> (5 mL). Et<sub>2</sub>O was added; the precipitate was filtrated and washed with Et<sub>2</sub>O. The solid was dried under high vacuo to give **7a** (2.22 g, 6.47 mmol, 78%) as light grey powder. MP = 134.5 °C; <sup>1</sup>H NMR (300 MHz, DMSO-*d*<sub>6</sub>) δ 9.85 (s, 1H, CH), 8.12 (t, *J* = 1.8 Hz, 1H), 7.96 (t, *J* = 1.6 Hz, 1H), 7.42 (m, 4H), 7.15 (s, 2H), 5.55 (s, 2H), 5.36 (t, *J* = 5.7 Hz, 1H), 4.51 (d, *J* = 5.5 Hz, 2H), 2.33 (s, 3H), 2.01 (s, 6H); <sup>13</sup>C NMR (75 MHz, DMSO-*d*<sub>6</sub>) δ 143.4, 140.2, 137.6, 134.2, 133.1, 131.1, 129.3, 128.0, 127.0, 124.2, 123.1, 62.4, 52.1, 20.6, 16.9; IR (neat) ν = 3245, 2987, 1560, 1545, 1492, 1465, 1448, 1371, 1199, 1157 cm<sup>-1</sup>; HRMS calcd for C<sub>20</sub>H<sub>23</sub>ON<sub>2</sub> [M]<sup>+</sup>: 307.1805, found: 307.1808.

<sup>1</sup> Redwan, I. N.; Grötl, M. *J. Org. Chem.* **2012**, *77*, 7071–7075.

<sup>2</sup> Drescher, S.; Sonnenberger, S.; Meister, A.; Blume, A.; Dobner, B. *Monatshefte für Chemie* **2012**, *143*, 1533–1543.

**1-(2,6-Diisopropylphenyl)-3-(4-(hydroxymethyl)benzyl)-1H-imidazol-3-ium chloride (7b):**

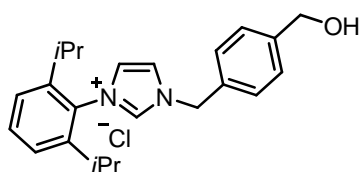

Compound **7b** was synthesized according to the procedure of **7a**. **3** (1 g, 4.15 mmol) was dissolved in MeCN (15 mL) and 2,6-diisopropylphenyl imidazole **2b** (948 mg, 4.15 mmol) was added to give **7b** (1.21 g, 3.14 mmol, 76%) as light brown powder; MP: 127.3 °C; <sup>1</sup>H NMR (300 MHz, DMSO-*d*<sub>6</sub>) δ 10.05 (s, 1H), 8.21 (t, *J* = 1.6 Hz, 1H), 8.12 (t, *J* = 1.6 Hz, 1H), 7.63 (t, *J* = 7.7 Hz, 1H), 7.35-7.49 (m, 6H), 5.59 (s, 2H), 4.51 (s, 2H), 2.20 (spt, *J* = 6.6 Hz, 2H), 1.12 (d, *J* = 6.6 Hz, 12H); <sup>13</sup>C NMR (125 MHz, DMSO-*d*<sub>6</sub>) δ 145.0, 143.4, 138.0, 133.1, 131.4, 130.5, 127.8, 126.9, 125.3, 124.4, 123.4, 62.3, 52.1, 28.1, 23.8, 23.5; IR (neat) ν = 3268, 2961, 2925, 2868, 1560, 1543, 1455, 1366 cm<sup>-1</sup>; HRMS calcd for C<sub>23</sub>H<sub>29</sub>ON<sub>2</sub> [M]<sup>+</sup>: 349.2274, found: 349.2279.

**3-(4-(Chloromethyl)benzyl)-1-mesityl-1H-imidazol-3-ium chloride (8a):**

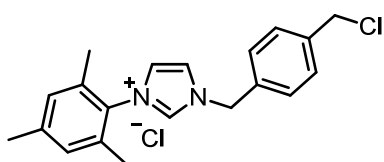

Compound **7a** (2.11 g, 6.15 mmol) was dissolved in CHCl<sub>3</sub> (60 mL) and pyridine (25 μL, 0.31 mmol) thionyl chloride (1.11 mL, 15.3 mmol) were added. The solution was stirred at rt for 30 min. Aqueous NaHCO<sub>3</sub> was added and the phases were separated. The aqueous phase was extracted with CHCl<sub>3</sub> and the combined organic phases were washed with aqueous NaCl, dried with MgSO<sub>4</sub> and filtrated. The solvent was evaporated in vacuo. Then CH<sub>2</sub>Cl<sub>2</sub> (10 mL) was added, followed by Et<sub>2</sub>O. The resulting precipitate was filtrated, washed with Et<sub>2</sub>O and dried in vacuo to give **8a** (2.14 g, 5.92 mmol, 96%) as a yellow solid. MP: 93.7 °C; <sup>1</sup>H NMR (200 MHz, CDCl<sub>3</sub>) δ 10.83 (s, 1H), 7.84 (s, 1H), 7.64 (d, *J* = 8.3 Hz, 2H), 7.36 (d, *J* = 8.1 Hz, 2H), 7.11 (s, 1H), 6.95 (s, 2H), 5.95 (s, 2H), 4.54 (s, 2H), 2.30 (s, 3H), 2.01 (s, 6H); <sup>13</sup>C NMR (125 MHz, CDCl<sub>3</sub>) δ 141.3, 138.7, 138.6, 134.2, 134.1, 130.8, 129.9, 129.7, 129.6, 123.3, 122.9, 52.9, 45.6, 21.2, 17.7; IR (neat) ν = 3375, 2949, 1608, 1560, 1545, 1516, 1485, 1444, 1370 cm<sup>-1</sup>; HRMS calcd for C<sub>20</sub>H<sub>22</sub>N<sub>2</sub>Cl [M]<sup>+</sup>: 325.1466, found: 325.1468.

**3-(4-(Chloromethyl)benzyl)-1-(2,6-diisopropylphenyl)-1H-imidazol-3-ium chloride (8b):**

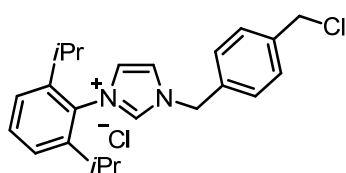

Compound **8b** synthesized according to the procedure of **8a**. **7b** (1.14 g, 2.97 mmol) was dissolved in CHCl<sub>3</sub> (30 mL), then pyridine (12 μL, 0.15 mmol) and thionyl chloride (538 μL, 7.42 mmol) were added to give **8b** (1.08 g, 2.68 mmol, 90%) as yellow powder. MP: 89.6 °C; <sup>1</sup>H NMR (500 MHz, CDCl<sub>3</sub>) δ 10.80 (s, 1H), 8.07 (s, 1H), 7.67 (d, *J* = 8.1 Hz, 2H), 7.48 (t, *J* = 7.9 Hz, 1H), 7.34 (d, *J* = 8.1 Hz, 2H), 7.24 (d, *J* = 7.9 Hz, 2H), 7.11 (s, 1H), 6.00 (s, 2H), 4.53 (s, 2H), 2.19 (spt, *J* = 6.8 Hz, 2H), 1.15 (d, *J* = 6.9 Hz, 6H), 1.08 (d, *J* = 6.7 Hz, 6H); <sup>13</sup>C NMR (125 MHz, CDCl<sub>3</sub>) δ 145.4, 138.8, 138.6, 134.4, 131.9, 130.4, 129.7, 129.5, 124.7, 124.2, 123.3, 52.8, 45.7, 28.8, 24.5, 24.0; IR (neat) ν = 2962, 2927, 2870, 1544, 1455, 1367 cm<sup>-1</sup>; HRMS calculated C<sub>23</sub>H<sub>28</sub>N<sub>2</sub>Cl [M]<sup>+</sup>: 367.1936, found: 367.1932.

**3-(4-((Trimethylammonium)methyl)benzyl)-1-mesityl-1*H*-imidazol-3-ium chloride (9aa):**

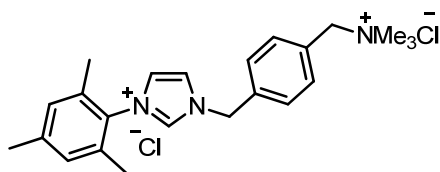

**8a** (200 mg, 0.554 mmol) was dissolved in dry MeOH (5 mL) und Ar atmosphere and Me<sub>3</sub>N (2.51 mL, 10.517 mmol, 33 w% in EtOH) was added. After stirring under reflux overnight, the excess of Me<sub>3</sub>N was removed in vacuo. The residue was dissolved in MeOH (3 mL) and Et<sub>2</sub>O was added to precipitate the product. The solid was filtrated, washed with Et<sub>2</sub>O and dried in vacuo to give **9aa** (80 mg, 0.190 mmol, 69%) as white powder. <sup>1</sup>H NMR (300MHz, CD<sub>3</sub>OD) δ 9.42 (s, 1H), 7.97 (d, *J* = 1.8 Hz, 1H), 7.80 (d, *J* = 1.8 Hz, 1H), 7.69 (dd, *J* = 8.4, 19.4 Hz, 4H), 7.14 (s, 2H), 5.69 (s, 2H), 4.62 (s, 2H), 3.15 (s, 9H), 2.37 (s, 3H), 2.08 (s, 6H); <sup>13</sup>C NMR (75MHz, CD<sub>3</sub>OD) δ 179.8, 142.8, 138.2, 135.9, 135.3, 132.6, 130.9, 130.6, 130.5, 126.1, 124.9, 69.8, 54.0, 53.4, 21.3, 17.5. HRMS calcd for C<sub>23</sub>H<sub>31</sub>N<sub>3</sub> [M]<sup>2+</sup>: 174.6254; found: 174.6257.

**3-(4-((Triethylammonium)methyl)benzyl)-1-mesityl-1*H*-imidazol-3-ium chloride (9ab):**

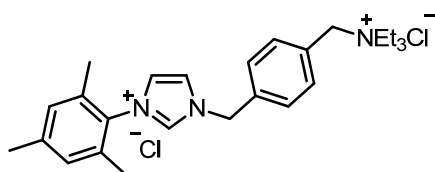

Compound **9ab** was synthesized according to the procedure of **9aa**. **8a** (400 mg, 1.107 mmol) was dissolved in MeOH (15 mL) and Et<sub>3</sub>N (2.92 mL, 21.035 mmol) was added to give **9ab** (390 mg, 0.8432 mmol, 76%) as brownish powder. <sup>1</sup>H NMR (300 MHz, DMSO-*d*<sub>6</sub>) δ 10.25 (s, 1H), 8.27 (s, 1H), 8.03 (s, 1H), 7.66 (dd, *J* = 17.2, 8.1 Hz, 4H), 7.15 (s, 2H), 5.74 (s, 2H), 4.59 (s, 2H), 3.21 (q, *J* = 7.0 Hz, 6H), 2.32 (s, 3H), 2.02 (s, 6H), 1.30 (t, *J* = 7.0 Hz, 9H); <sup>13</sup>C NMR (75 MHz, DMSO-*d*<sub>6</sub>) δ 140.2, 138.1, 136.9, 134.2, 133.2, 131.1, 129.3, 128.8, 128.5, 124.2, 123.2, 59.1, 52.1, 51.4, 20.6, 17.0, 7.6; HRMS calcd for C<sub>26</sub>H<sub>37</sub>N<sub>3</sub> [M]<sup>+</sup>: 391.2982; found: 391.2981.

**3-(4-((Tributylammonium)methyl)benzyl)-1-mesityl-1*H*-imidazol-3-ium chloride (9ac):**

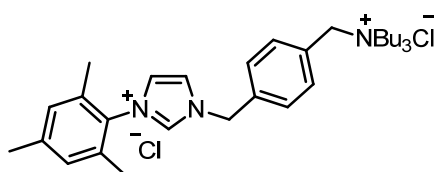

Compound **9ac** was synthesized according to the procedure of **9aa**. **8a** (400 mg, 1.107 mmol) was dissolved in MeOH (15 mL) and Bu<sub>3</sub>N (5 mL, 21.035 mmol) was added to give **9ac** (400 mg, 0.7317 mmol, 66%) as brownish powder. <sup>1</sup>H NMR (300 MHz, DMSO-*d*<sub>6</sub>) δ 10.25 (s, 1H), 8.29 (s, 1H), 8.03 (s, 1H), 7.67 (m, 4H), 7.15 (s, 2H), 5.75 (s, 2H), 4.65 (s, 2H), 3.12-3.17 (m, 6H), 2.32 (s, 4H), 2.02 (s, 6H), 1.71 (br. s., 6H), 1.29 (sxt, *J* = 7.0 Hz, 6H), 0.93 (t, *J* = 7.3 Hz, 9H); <sup>13</sup>C NMR (75 MHz, DMSO-*d*<sub>6</sub>) δ 140.2, 138.1, 137.1, 134.1, 133.2, 131.1, 129.3, 128.9, 128.6, 124.1, 123.3, 60.9, 57.6, 51.4, 23.3, 20.6, 19.2, 16.9, 13.5; HRMS calcd for C<sub>32</sub>H<sub>49</sub>N<sub>3</sub> [M]<sup>+</sup>: 475.3921; found: 475.3931.

**3-(4-((Trimethylammonium)methyl)benzyl)-1-(2,6-diisopropylphenyl)-1*H*-imidazol-3-ium chloride (9ba):**

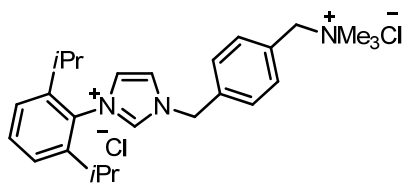

Compound **9ba** was synthesized according to the procedure of **9aa**. **8b** (200 mg, 0.496 mmol) was dissolved in MeOH (5 mL) and Me<sub>3</sub>N (1.69 mL, 9.42 mmol, 33wt% in EtOH) was added to give **9ba** (198 mg, 0.428 mmol, 86%) as brownish powder. <sup>1</sup>H NMR (500MHz, DMSO-*d*<sub>6</sub>) δ 10.16 (s, 1H), 8.30 (s, 1H), 8.16 (s, 1H), 7.73-7.60 (m, 5H), 7.46 (d, *J* = 7.6 Hz, 2H), 5.74 (s, 2H), 4.71 (s, 2H), 3.09 (s, 9H), 2.23 (spt, *J* = 6.6 Hz, 2H), 1.13 (t, *J* = 7.6 Hz, 12H); <sup>13</sup>C NMR (125MHz, DMSO-*d*<sub>6</sub>) δ 144.9, 138.3, 136.9, 133.5, 131.4, 130.5, 129.1, 128.6, 125.2, 124.4, 123.6, 66.8, 51.7, 51.6, 28.1, 23.8, 23.5; HRMS calcd for C<sub>26</sub>H<sub>37</sub>N<sub>3</sub> [M]<sup>+</sup>: 195.6488; found: 195.6494.

**3-(4-((Triethylammonium)methyl)benzyl)-1-(2,6-diisopropylphenyl)-1*H*-imidazol-3-ium chloride (9bb):**

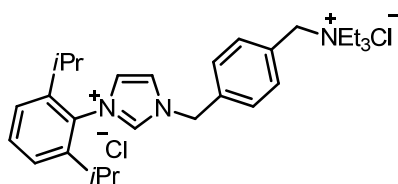

**9bb** was synthesized according to the procedure of **9aa**. **8b** (400 mg, 0.992 mmol) was dissolved in MeOH (15 mL) and Et<sub>3</sub>N (2.61 mL, 18.840 mmol) was added to give **9bb** (350 mg, 0.6936 mmol, 70%) as brownish powder. <sup>1</sup>H NMR (500 MHz, DMSO-*d*<sub>6</sub>) δ 10.34 (s, 1H), 8.37 (t, *J* = 1.5 Hz, 1H), 8.15 (t, *J* = 1.5 Hz, 1H), 7.66 (dd, *J* = 19.9, 8.0 Hz, 4H), 7.63 (dd, *J* = 15.3, 7.6 Hz, 1H), 7.45 (d, *J* = 7.6 Hz, 2H), 5.77 (s, 2H), 4.59 (s, 2H), 3.21 (q, *J* = 7.1 Hz, 6H), 2.20 (spt, *J* = 6.8 Hz, 2H), 1.30 (t, *J* = 7.1 Hz, 9H), 1.12 (t, *J* = 7.3 Hz, 12H); <sup>13</sup>C NMR (125 MHz, DMSO-*d*<sub>6</sub>): δ 144.9, 138.3, 137.0, 133.2, 131.4, 130.5, 128.8, 128.5, 125.2, 124.4, 123.5, 59.2, 52.1, 51.5, 28.1, 23.8, 23.5, 7.6; HRMS calcd for C<sub>29</sub>H<sub>43</sub>N<sub>3</sub> [M]<sup>+</sup>: 433.3452; found: 433.3470.

**3-(4-((Tributylammonium)methyl)benzyl)-1-(2,6-diisopropylphenyl)-1*H*-imidazol-3-ium chloride (9bc):**

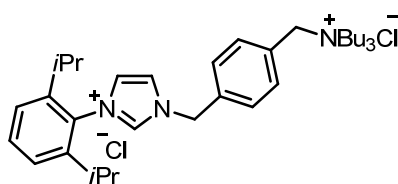

**9bc** was synthesized according to the procedure of **9aa**. **8b** (400 mg, 0.992 mmol) was dissolved in MeOH (15 mL) and Bu<sub>3</sub>N (4.48 mL, 18.840 mmol) was added to give **9bc** (220 mg, 0.3737 mmol, 38%) as brownish powder. <sup>1</sup>H NMR (500 MHz, DMSO-*d*<sub>6</sub>) δ 10.25 (s, 1H), 8.34 (t, *J* = 1.5 Hz, 1H), 8.15 (t, *J* = 1.7 Hz, 1H), 7.64 (m, 5H), 7.46 (d, *J* = 8.0 Hz, 2H), 5.75 (s, 2H), 4.63 (s, 2H), 3.13 (m, 6H), 2.21 (spt, *J* = 6.7 Hz, 2H), 1.72 (dt, *J* = 15.3, 7.3 Hz, 6H), 1.30 (sxt, *J* = 7.3 Hz, 6H), 1.12 (t, *J* = 6.9 Hz, 12H), 0.94 (t, *J* = 7.5 Hz, 9H); <sup>13</sup>C NMR (125 MHz, DMSO-*d*<sub>6</sub>) δ 144.9, 138.3, 137.1, 133.2, 131.4, 130.5, 128.7, 128.5, 125.2, 124.4, 123.6, 60.9, 57.6, 51.6, 28.1, 23.8, 23.5, 23.3, 19.2, 13.4; HRMS calcd for C<sub>35</sub>H<sub>55</sub>N<sub>3</sub> [M]<sup>2+</sup>: 258.7193; found: 258.7199.

**(1-(4-((Trimethylammonio)methyl)benzyl)-3-mesityl-2,3-dihydro-1H-imidazol-2-yl)gold(I) chloride (1aa):**

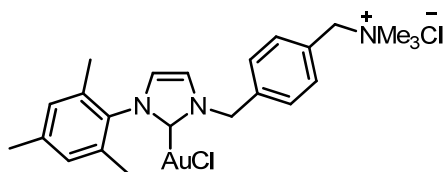

**9aa** (71 mg, 0.170 mmol) was dissolved in dry MeOH (5 mL) under Ar atmosphere with exclusion from light and KO<sup>t</sup>Bu (19 mg, 0.169 mmol) and Au(SMe<sub>2</sub>)Cl (50 mg, 0.169 mmol) were added. The mixture was heated to reflux overnight. After cooling to rt the solution was concentrated and the product was precipitated by dropwise addition of Et<sub>2</sub>O. **1aa** (63 mg, 0.102 mmol, 60%) was obtained as an off-white powder. <sup>1</sup>H NMR (500MHz, DMSO-d<sub>6</sub>) δ 7.88 (d, *J* = 1.1 Hz, 1H), 7.64-7.57 (m, 3H), 7.45 (d, *J* = 7.6 Hz, 2H), 7.08 (s, 2H), 5.57 (s, 2H), 4.63 (s, 2H), 3.07 (s, 9H), 2.31 (s, 3H), 1.98 (s, 6H); <sup>13</sup>C NMR (125MHz, DMSO-d<sub>6</sub>) δ 170.3, 138.9, 138.9, 134.9, 134.4, 133.2, 129.0, 128.2, 127.4, 123.4, 122.7, 67.0, 53.1, 51.7, 20.6, 17.3; HRMS calcd for C<sub>23</sub>H<sub>30</sub>N<sub>3</sub>AuCl [M]<sup>+</sup>: 580.1788; found: 580.1790.

**(1-(4-((Triethylammonio)methyl)benzyl)-3-mesityl-2,3-dihydro-1H-imidazol-2-yl)gold(I) chloride (1ab):**

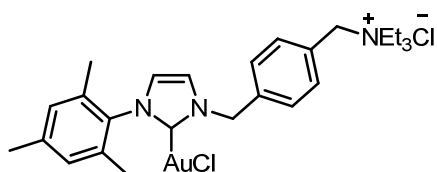

According to the synthesis of **1aa**, **9ab** (79 mg, 0.170 mmol) was dissolved in MeOH (5 mL) and KO<sup>t</sup>Bu (19 mg, 0.169 mmol) and Au(SMe<sub>2</sub>)Cl (50 mg, 0.169 mmol) were added. **1ab** (81 mg, 0.123 mmol, 72%) was obtained as an off-white powder. <sup>1</sup>H NMR (500MHz, CDCl<sub>3</sub>) δ 7.63 (d, *J* = 7.6 Hz, 3H), 7.54 (d, *J* = 1.9 Hz, 1H), 7.40 (d, *J* = 8.0 Hz, 2H), 6.92 (s, 2H), 5.55 (s, 2H), 4.84 (s, 2H), 3.39 (q, *J* = 7.1 Hz, 6H), 2.30 (s, 3H), 2.00 (s, 6H), 1.42 (t, *J* = 7.3 Hz, 12H); <sup>13</sup>C NMR (125MHz, CDCl<sub>3</sub>) δ 172.0, 139.7, 138.7, 134.8, 134.7, 133.5, 129.5, 128.4, 127.7, 122.8, 122.2, 61.0, 54.1, 53.2, 21.2, 18.0, 8.6; HRMS calcd for C<sub>26</sub>H<sub>36</sub>N<sub>3</sub>AuCl [M]<sup>+</sup>: 622.2258; found: 622.2261.

**(1-(4-((Tributylammonio)methyl)benzyl)-3-mesityl-2,3-dihydro-1H-imidazol-2-yl)gold(I) chloride (1ac):**

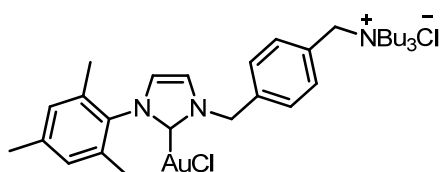

According to the synthesis of **1aa**, **9ac** (93 mg, 0.170 mmol) was dissolved in MeOH (5 mL) and KO<sup>t</sup>Bu (19 mg, 0.169 mmol) and Au(SMe<sub>2</sub>)Cl (50 mg, 0.169 mmol) were added. **1ac** (90 mg, 0.121 mmol, 71%) was obtained as an off-white powder. <sup>1</sup>H NMR (500MHz, CDCl<sub>3</sub>) δ 7.66-7.55 (m, 4H), 7.39 (d, *J* = 8.0 Hz, 2H), 6.92 (s, 2H), 5.53 (s, 2H), 4.92 (s, 2H), 3.31-3.22 (m, 6H), 2.29 (s, 3H), 1.98 (s, 6H), 1.80-1.72 (m, 6H), 1.38 (dd, *J* = 7.3, 14.5 Hz, 6H), 0.95 (t, *J* = 7.6 Hz, 12H); <sup>13</sup>C NMR (125MHz, CDCl<sub>3</sub>) δ 172.2, 139.7, 138.9, 134.8, 134.7, 133.4, 129.5, 128.6, 127.9, 122.7, 122.2, 62.8, 58.8, 54.2, 24.6, 21.2, 19.9, 17.9, 13.8; HRMS calcd for C<sub>32</sub>H<sub>48</sub>N<sub>3</sub>AuCl [M]<sup>+</sup>: 706.3197; found: 706.3208.

**(1-(2,6-Diisopropylphenyl)-3-(4-((trimethylammonio)methyl)benzyl)-2,3-dihydro-1H-imidazol-2-yl)gold(I) chloride (1ba):**

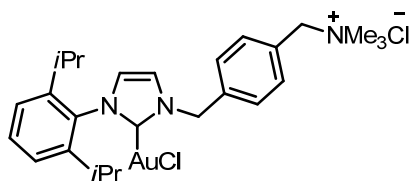

According to the synthesis of **1aa**, **9ba** (112 mg, 0.242 mmol) was dissolved in MeOH (5 mL) and KO<sup>t</sup>Bu (27 mg, 0.241 mmol) and Au(SMe<sub>2</sub>)Cl (71 mg, 0.241 mmol) were added. **1ba** (120 mg, 0.182 mmol, 75%) was obtained as an off-white powder. <sup>1</sup>H NMR (500MHz, DMSO-d<sub>6</sub>) δ 7.89 (d, *J* = 1.5 Hz, 1H), 7.74 (d, *J* = 1.5 Hz, 1H), 7.62 (d, *J* = 8.0 Hz, 2H), 7.56-7.51 (m, 1H), 7.44 (d, *J* = 8.0 Hz, 2H), 7.37 (d, *J* = 7.6 Hz, 2H), 5.57 (s, 2H), 4.60 (s, 2H), 3.05 (s, 9H), 2.33 (spt, *J* = 6.8 Hz, 2H), 1.21 (d, *J* = 6.9 Hz, 6H), 1.12 (d, *J* = 6.9 Hz, 6H); <sup>13</sup>C NMR (125MHz, DMSO-d<sub>6</sub>) δ 171.4, 145.3, 139.0, 134.3, 133.2, 130.3, 128.2, 127.4, 124.6, 123.9, 122.6, 67.2, 53.1, 51.7, 28.0, 23.9, 23.7; HRMS calcd for C<sub>26</sub>H<sub>36</sub>N<sub>3</sub>AuCl [M+H]<sup>+</sup>: 622.2258; found: 622.2259.

**(1-(2,6-Diisopropylphenyl)-3-(4-((triethylammonio)methyl)benzyl)-2,3-dihydro-1H-imidazol-2-yl)gold(I) chloride (1bb):**

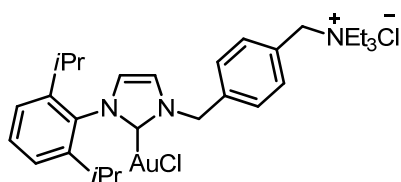

According to the synthesis of **1aa**, **9bb** (85 mg, 0.170 mmol) was dissolved in MeOH (5 mL) and KO<sup>t</sup>Bu (19 mg, 0.169 mmol) and Au(SMe<sub>2</sub>)Cl (50 mg, 0.169 mmol) were added. **1bb** (115 mg, 0.164 mmol, 96%) was obtained as an off-white powder. <sup>1</sup>H NMR (500MHz, CDCl<sub>3</sub>) δ 7.66 (d, *J* = 7.6 Hz, 2H), 7.55 (d, *J* = 1.9 Hz, 1H), 7.46 (t, *J* = 7.6 Hz, 1H), 7.40 (d, *J* = 8.0 Hz, 2H), 7.24 (d, *J* = 8.0 Hz, 2H), 6.98 (d, *J* = 1.9 Hz, 1H), 5.56 (s, 2H), 4.95 (s, 2H), 3.42 (q, *J* = 7.1 Hz, 6H), 2.38 (spt, *J* = 6.8 Hz, 2H), 1.45 (t, *J* = 7.1 Hz, 9H), 1.26 (d, *J* = 6.9 Hz, 6H), 1.13 (d, *J* = 6.5 Hz, 6H); <sup>13</sup>C NMR (125MHz, CDCl<sub>3</sub>) δ 173.1, 145.7, 138.8, 134.2, 133.5, 130.7, 128.6, 127.7, 124.3, 123.9, 122.1, 61.1, 54.3, 53.2, 28.5, 24.5, 24.3, 8.6; HRMS calcd for C<sub>29</sub>H<sub>42</sub>N<sub>3</sub>AuCl [M]<sup>+</sup>: 664.2727; found: 664.2741.

**(1-(2,6-Diisopropylphenyl)-3-(4-((tributylammonio)methyl)benzyl)-2,3-dihydro-1H-imidazol-2-yl)gold(I) chloride (1bc):**

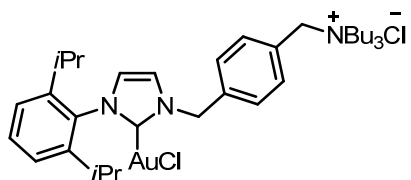

According to the synthesis of **1aa**, **9bc** (100 mg, 0.170 mmol) was dissolved in MeOH (5 mL) and KO<sup>t</sup>Bu (19 mg, 0.169 mmol) and Au(SMe<sub>2</sub>)Cl (50 mg, 0.169 mmol) were added. **1bc** (107 mg, 0.136 mmol, 80%) was obtained as an off-white powder. <sup>1</sup>H NMR (500MHz, DMSO-d<sub>6</sub>) δ 7.63-7.56 (m, 3H), 7.44 (t, *J* = 7.3 Hz, 1H), 7.41 (d, *J* = 8.0 Hz, 2H), 7.22 (d, *J* = 8.0 Hz, 2H), 6.96 (d, *J* = 1.5 Hz, 1H), 5.56 (s, 2H), 4.98 (s, 2H), 3.30-3.24 (m, 6H), 2.37 (spt, *J* = 6.8 Hz, 2H), 1.78 (td, *J* = 7.9, 15.2 Hz, 6H), 1.39 (sxt, *J* = 7.3 Hz, 6H), 1.25 (d, *J* = 6.9 Hz, 6H), 1.11 (d, *J* = 6.9 Hz, 6H), 0.97 (t, *J* = 7.5 Hz, 9H); <sup>13</sup>C NMR (125MHz, DMSO-d<sub>6</sub>) δ 171.4, 145.2, 139.2, 134.3, 132.9, 130.3, 127.7, 127.6, 124.5, 123.9, 122.7, 60.9, 57.5, 53.0, 28.0, 23.8, 23.7, 23.2, 19.2, 13.4; HRMS calcd for C<sub>35</sub>H<sub>54</sub>N<sub>3</sub>AuCl [M]<sup>+</sup>: 748.3666; found: 748.3684.

## 2. Gold-catalyzed Cyclization of Carboxylic Acids

### Alkynoic acids

**10a** was purchased from AlfaAesar. **10b** was synthesized similar to the procedure of **10d**, instead of 1-trimethylsilyl-3-bromopropyne, propargyl bromide (80 w% in THF) was used and the residue was distilled to give **10b** at 110 °C, 20 mbar. **10c** and **10d** were obtained following known procedures<sup>3,4</sup>. The methyl ester of **10e** was synthesized according to reference<sup>5</sup> and the ester was cleaved with NaOH according to reference<sup>3</sup>.

### General procedure for the cycloisomerization of alkynoic acids

Alkynoic acid **10** (40 mg) was dissolved in 1M Et<sub>3</sub>N·HOAc buffer solution (2mL) under air. Carboxylic acids which are not soluble in water were dissolved in THF first to give a 0.5 M solution. Then catalyst **1a/1b** (2.5 mol%) was added. The reaction was monitored by TLC. After full conversion, the solution was extracted with Et<sub>2</sub>O (5x2 mL). The combined organic phases were dried over MgSO<sub>4</sub>, filtered and the solvent was removed *in vacuo*. Purification by column chromatography gave  $\gamma$ -alkylidene lactone **11**. The recycling was performed by addition of fresh alkynoic acid to the aqueous phase and repetition of the procedure.

### 5-Methylenedihydrofuran-2-one (11a):

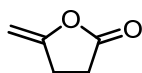

Colorless oil. <sup>1</sup>H NMR (500MHz, CDCl<sub>3</sub>)  $\delta$  4.75 (dd,  $J$  = 2.3, 4.2 Hz, 1H), 4.32 (dd,  $J$  = 1.9, 4.2 Hz, 1H), 2.93-2.84 (m, 2H), 2.72-2.63 (m, 2H); <sup>13</sup>C NMR (125MHz, CDCl<sub>3</sub>)  $\delta$  175.0, 155.8, 88.9, 28.1, 25.2. Known compound.<sup>[6]</sup>

### 4-Oxopentanoic acid (12a):

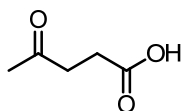

**12a** was synthesized according to the general procedure for the cycloisomerization of alkynoic acids. As starting material **11a** was used. Colorless oil. <sup>1</sup>H NMR (500MHz, CDCl<sub>3</sub>)  $\delta$  8.89 (br.s, 1H), 2.77-2.73 (m, 2H), 2.63 (t,  $J$  = 6.5 Hz, 2H), 2.20 (s, 3H); <sup>13</sup>C NMR (125MHz, CDCl<sub>3</sub>)  $\delta$  206.7, 178.4, 37.8, 29.9, 27.9. Known compound.<sup>[7]</sup>

### 3-Methyl-5-methylenedihydrofuran-2-one (11b):

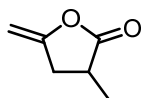

Colorless oil. <sup>1</sup>H NMR (300MHz, CDCl<sub>3</sub>)  $\delta$  4.74 (dd,  $J$  = 2.6, 4.0 Hz, 1H), 4.34-4.30 (m, 1H), 3.06 (tdd,  $J$  = 1.5, 9.5, 15.7 Hz, 1H), 2.91-2.76 (m, 1H), 2.52 (tdd,  $J$  = 2.2, 8.4, 15.8 Hz, 1H), 1.33 (d,  $J$  = 7.0 Hz, 3H); <sup>13</sup>C NMR (75MHz, CDCl<sub>3</sub>)  $\delta$  177.9, 154.3, 89.0, 35.0, 33.8, 16.0. Known compound.<sup>[8]</sup>

<sup>3</sup> Spencer, R. W.; Tam, T. F.; Thomas, E.; Robison, V. J.; Krantz, A. *J. Am. Chem. Soc.* **1986**, *108*, 5589–5597.

<sup>4</sup> Krafft, G. A.; Katzenellenbogen, J. A., *J. Am. Chem. Soc.* **1981**, *103*, 5459-5466.

<sup>5</sup> Nakamura, I.; Ching, S. C.; Araki, T.; Terada, M.; Yamamoto, Y. *Org. Lett.*, **2008**, *10*, 309–312.

<sup>6</sup> Nagendiran, A.; Verho, O.; Haller, C.; Johnston, E. V.; Bäckvall, J.-E. *J. Org. Chem.* **2014**, *79*, 1399–1405.

<sup>7</sup> Alemán, J.; del Solar, V.; Cubo, L.; Quiroga, A. G.; Navarro Ranninger, C. *Dalton Trans.* **2010**, *39*, 10601–10607.

<sup>8</sup> Günther, H. J.; Guntrum, E.; Jäger, V., *Liebigs Ann. Chem.* **1984**, 15–30.



### 3-Isopropyl-5-methylenedihydrofuran-2-one (11c):

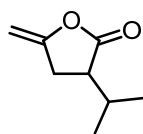

Yellowish oil.  $^1\text{H}$  NMR (300MHz,  $\text{CDCl}_3$ )  $\delta$  4.72-4.66 (m, 1H), 4.31-4.26 (m, 1H), 2.92-2.78 (m, 1H), 2.76-2.60 (m, 2H), 2.19 (dtd,  $J = 4.8, 6.9, 13.7$  Hz, 1H), 1.02 (d,  $J = 7.0$  Hz, 3H), 0.94 (d,  $J = 6.6$  Hz, 3H);  $^{13}\text{C}$  NMR (75MHz,  $\text{CDCl}_3$ )  $\delta$  176.6, 154.9, 88.4, 46.0, 29.1, 27.8, 20.1, 18.2. IR (neat)  $\nu = 2961, 2928, 2874, 1754, 1653, 1366\text{ cm}^{-1}$ ; Anal. Calcd for  $\text{C}_8\text{H}_{12}\text{O}_2$ : C, 68.54; H, 8.63; Found: C, 68.3; H, 8.7.

### 5-Methylene-3-phenyldihydrofuran-2-one (11d):

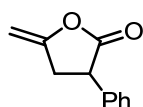

Colorless oil.  $^1\text{H}$  NMR (300MHz,  $\text{CDCl}_3$ )  $\delta$  7.44-7.18 (m, 5H), 4.84 (dd,  $J = 2.2, 4.4$  Hz, 1H), 4.42 (dd,  $J = 1.8, 4.4$  Hz, 1H), 3.98 (dd,  $J = 7.7, 9.9$  Hz, 1H), 3.33 (tdd,  $J = 1.8, 10.1, 16.3$  Hz, 1H), 3.00 (tdd,  $J = 2.0, 7.7, 16.4$  Hz, 1H);  $^{13}\text{C}$  NMR (75MHz,  $\text{CDCl}_3$ )  $\delta$  175.1, 154.1, 136.7, 129.1, 128.0, 127.6, 89.2, 46.0, 34.5. Known compound.<sup>[3]</sup>

### 5-Methylene-3,3-diphenyldihydrofuran-2-one (11e):

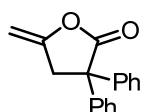

Colorless oil.  $^1\text{H}$  NMR (500MHz,  $\text{CDCl}_3$ )  $\delta$  7.36 (d,  $J = 4.2$  Hz, 7H), 7.35-7.29 (m, 3H), 4.82 (dd,  $J = 1.9, 4.6$  Hz, 1H), 4.45 (dd,  $J = 1.5, 4.2$  Hz, 1H), 3.59 (t,  $J = 1.7$  Hz, 2H);  $^{13}\text{C}$  NMR (125MHz,  $\text{CDCl}_3$ )  $\delta$  175.2, 152.8, 141.0, 128.8, 127.8, 127.5, 89.5, 57.3, 41.8. Known compound.<sup>[9]</sup>

**Table 1. Detailed information for the cyclization reactions of carboxylic acids 10.**

| Product    | R <sup>1</sup> | R <sup>2</sup> | Catalyst   | Time in h <sup>[a]</sup> | Yield in % <sup>[b]</sup> |
|------------|----------------|----------------|------------|--------------------------|---------------------------|
| <b>11a</b> | H              | H              | <b>1aa</b> | 0.5                      | 69                        |
|            |                |                | <b>1ab</b> | 1                        | 89                        |
|            |                |                | <b>1ac</b> | 1                        | 85                        |
|            |                |                | <b>1ba</b> | 1                        | 77                        |
|            |                |                | <b>1bb</b> | 1                        | 78                        |
|            |                |                | <b>1bc</b> | 1                        | 77                        |
| <b>11b</b> | Me             | H              | <b>1aa</b> | 2.5                      | 77                        |
|            |                |                | <b>1ab</b> | 2                        | 85                        |
|            |                |                | <b>1ac</b> | 2.5                      | 83                        |
|            |                |                | <b>1ba</b> | 2.5                      | 67                        |
|            |                |                | <b>1bb</b> | 2                        | 71                        |
|            |                |                | <b>1bc</b> | 4                        | 65                        |

<sup>9</sup> Rudler, H.; Harris, P.; Parlier, A.; Cantagrel, F.; Denise, B.; Bellassoued, M.; Vaissermann, J. *J. Organomet. Chem.* **2001**, *624*, 186–202.

| Product                     | R <sup>1</sup> | R <sup>2</sup> | Catalyst                  | Time in h <sup>[a]</sup> | Yield in % <sup>[b]</sup> |
|-----------------------------|----------------|----------------|---------------------------|--------------------------|---------------------------|
| <b>11c</b> <sup>[c]</sup>   | iPr            | H              | <b>1aa</b>                | 0.5                      | 86                        |
|                             |                |                | <b>1ab</b>                | 0.5                      | 94                        |
|                             |                |                | <b>1ac</b>                | 2.5                      | 91                        |
|                             |                |                | <b>1ba</b>                | 1.5                      | 72                        |
|                             |                |                | <b>1bb</b>                | 1                        | 78                        |
|                             |                |                | <b>1bc</b>                | 6                        | 71                        |
| <b>11d</b> <sup>[c]</sup>   | Ph             | H              | <b>1aa</b>                | 4                        | 72                        |
|                             |                |                | <b>1ab</b>                | 4.5                      | 84                        |
|                             |                |                | <b>1a</b> <sup>[d]</sup>  | 2.5                      | 77                        |
|                             |                |                | <b>1ba</b>                | 4                        | 77                        |
|                             |                |                | <b>1bb</b>                | 4.5                      | 86                        |
|                             |                |                | <b>1bc</b> <sup>[d]</sup> | 3                        | 74                        |
| <b>11e</b> <sup>[c,d]</sup> | Ph             | Ph             | <b>1aa</b>                | 1                        | 81                        |
|                             |                |                | <b>1ab</b>                | 0.5                      | 84                        |
|                             |                |                | <b>1ac</b>                | 1.5                      | 72                        |
|                             |                |                | <b>1ba</b>                | 1                        | 71                        |
|                             |                |                | <b>1bb</b>                | 2                        | 76                        |
|                             |                |                | <b>1bc</b>                | 4                        | 69                        |

[a] Required time until full conversion was achieved; [b] Isolated yields; [c] 0.5 M carboxylic acid in THF was added; [d] 50°C.

### 3. Gold-catalyzed Cyclization of Amides

#### General procedure for the cycloisomerization of alkynoic amides

A solution of 0.3 M amide **13** (40 mg) in THF was added to 1M Et<sub>3</sub>N·HOAc buffer solution (2mL) under air. Then catalyst **1a/1b** (2.5 mol%) was added. The reaction was monitored by TLC. After full conversion, the solution was extracted with Et<sub>2</sub>O (5x2 mL). The combined organic phases were dried over MgSO<sub>4</sub>, filtered and the solvent was removed *in vacuo*. Purification by column chromatography gave  $\gamma$ -alkylidene lactam **14**. The recycling was performed by addition of fresh amide to the aqueous phase and repetition of the procedure.

#### 5-Methylene-1-tosylpyrrolidin-2-one (**14a**):

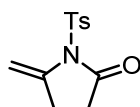

Colorless solid. MP: 87°C; <sup>1</sup>H NMR (300MHz, C<sub>6</sub>D<sub>6</sub>)  $\delta$  = 8.10 (d, *J* = 8.4 Hz, 2H), 6.73 (d, *J* = 8.1 Hz, 2H), 5.73 (q, *J* = 1.8 Hz, 1H), 4.22 (q, *J* = 1.7 Hz, 1H), 1.79 (s, 3H), 1.70-1.61 (m, 2H), 1.49-1.39 (m, 2H); <sup>13</sup>C NMR (125MHz, CDCl<sub>3</sub>)  $\delta$  173.8, 145.6, 141.1, 135.5, 129.8, 129.8, 128.2, 128.0, 126.5, 94.4, 30.0, 26.0, 21.8. IR (neat)  $\nu$  = 3357, 3259, 1762, 1658, 1595, 1356, 1298 cm<sup>-1</sup>; HRMS calcd for C<sub>12</sub>H<sub>14</sub>O<sub>3</sub>NS [M+H]<sup>+</sup>: 252.0689; found: 252.0688.

**3-Methyl-5-methylene-1-tosylpyrrolidin-2-one (14b):**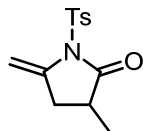

Yellow oil.  $^1\text{H}$  NMR (500MHz,  $\text{CDCl}_3$ )  $\delta$  7.96 (d,  $J$  = 8.0 Hz, 2H), 7.35 (d,  $J$  = 8.0 Hz, 2H), 5.52-5.50 (m, 1H), 4.59 (dd,  $J$  = 1.9, 3.1 Hz, 1H), 2.86 (dd,  $J$  = 9.2, 15.3 Hz, 1H), 2.63-2.53 (m, 1H), 2.46 (s, 3H), 2.32 (tdd,  $J$  = 2.2, 8.5, 15.1 Hz, 1H), 1.18 (d,  $J$  = 7.3 Hz, 3H)  $^{13}\text{C}$  NMR (75MHz,  $\text{CDCl}_3$ )  $\delta$  176.5, 145.6, 139.8, 135.5, 129.8, 128.1, 94.5, 36.3, 35.1, 21.9, 15.6; IR (neat)  $\nu$  = 2975, 2931, 2876, 1759, 1654, 1597, 1363  $\text{cm}^{-1}$ ; HRMS calcd for  $\text{C}_{13}\text{H}_{16}\text{O}_3\text{NS}$   $[\text{M}+\text{H}]^+$ : 266.0845; found: 266.0848.

**3-Isopropyl-5-methylene-1-tosylpyrrolidin-2-one (14c):**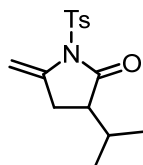

Yellowish oil.  $^1\text{H}$  NMR (500MHz,  $\text{C}_6\text{D}_6$ )  $\delta$  8.08 (d,  $J$  = 8.4 Hz, 2H), 6.72 (d,  $J$  = 8.0 Hz, 2H), 5.79 (dd,  $J$  = 1.5, 3.4 Hz, 1H), 4.33 (dd,  $J$  = 1.9, 3.1 Hz, 1H), 1.94-1.82 (m, 2H), 1.79 (s, 3H), 1.78-1.67 (m, 2H), 0.55 (d,  $J$  = 6.5 Hz, 3H), 0.47 (d,  $J$  = 6.9 Hz, 3H);  $^{13}\text{C}$  NMR (125MHz,  $\text{CDCl}_3$ )  $\delta$  175.5, 145.5, 140.4, 135.7, 129.7, 128.2, 94.0, 46.8, 29.1, 28.8, 21.8, 20.1, 17.8; IR (neat)  $\nu$  = 2961, 2929, 2874, 1752, 1652, 1597, 1364  $\text{cm}^{-1}$ ; HRMS calcd for  $\text{C}_{15}\text{H}_{19}\text{O}_3\text{NNaS}$   $[\text{M}+\text{Na}]^+$ : 316.0978; found: 316.0981.

**5-Methylene-3-phenyl-1-tosylpyrrolidin-2-one (14d):**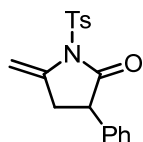

Yellow oil.  $^1\text{H}$  NMR (500MHz,  $\text{CDCl}_3$ )  $\delta$  = 7.96 (d,  $J$  = 8.0 Hz, 2H), 7.34 (d,  $J$  = 8.0 Hz, 2H), 7.31-7.24 (m, 3H), 7.10 (dd,  $J$  = 1.5, 7.6 Hz, 2H), 5.60 (d,  $J$  = 1.5 Hz, 1H), 4.68 (d,  $J$  = 1.5 Hz, 1H), 3.72 (dd,  $J$  = 7.5, 9.8 Hz, 1H), 3.12 (tdd,  $J$  = 1.5, 9.6, 15.7 Hz, 1H), 2.84 (tdd,  $J$  = 1.8, 7.3, 15.6 Hz, 1H), 2.45 (s, 3H);  $^{13}\text{C}$  NMR (125MHz,  $\text{CDCl}_3$ )  $\delta$  173.8, 145.7, 139.8, 137.1, 135.4, 129.8, 129.0, 128.3, 127.9, 127.6, 94.8, 47.2, 35.4, 27.1, 21.9; IR (neat)  $\nu$  = 3063, 3030, 2924, 1755, 1719, 1655, 1597, 1361  $\text{cm}^{-1}$ ; HRMS calcd for  $\text{C}_{18}\text{H}_{18}\text{O}_3\text{NS}$   $[\text{M}+\text{H}]^+$ : 328.1002; found: 328.1008.

**Table 2. Detailed information for the cyclization reactions of amides 13.**

| Product <sup>[a]</sup> | R | Catalyst   | Time in h <sup>[b]</sup> | Yield in % <sup>[c]</sup> |
|------------------------|---|------------|--------------------------|---------------------------|
| <b>14a</b>             | H | <b>1aa</b> | 1                        | 95                        |
|                        |   | <b>1ab</b> | 2                        | 92                        |
|                        |   | <b>1ac</b> | 2                        | 89                        |
|                        |   | <b>1ba</b> | 1                        | 86                        |
|                        |   | <b>1bb</b> | 2                        | 90                        |
|                        |   | <b>1bc</b> | 2                        | 92                        |

|            |     |            |     |    |
|------------|-----|------------|-----|----|
| <b>14b</b> | Me  | <b>1aa</b> | 1   | 84 |
|            |     | <b>1ab</b> | 1   | 78 |
|            |     | <b>1ac</b> | 2   | 80 |
|            |     | <b>1ba</b> | 1   | 87 |
|            |     | <b>1bb</b> | 1   | 79 |
|            |     | <b>1bc</b> | 3   | 72 |
| <b>14c</b> | iPr | <b>1aa</b> | 1   | 85 |
|            |     | <b>1ab</b> | 1   | 80 |
|            |     | <b>1ac</b> | 3   | 82 |
|            |     | <b>1ba</b> | 2   | 78 |
|            |     | <b>1bb</b> | 1.5 | 84 |
|            |     | <b>1bc</b> | 3   | 75 |
| <b>14d</b> | Ph  | <b>1aa</b> | 1   | 77 |
|            |     | <b>1ab</b> | 1.5 | 90 |
|            |     | <b>1ac</b> | 2.5 | 89 |
|            |     | <b>1ba</b> | 2   | 81 |
|            |     | <b>1bb</b> | 2   | 92 |
|            |     | <b>1bc</b> | 4   | 91 |

[a] 0.3 M amide in THF was added; [b] Required time until full conversion was achieved; [c] Isolated yields.

#### 4. Synthesis of 2-*epi*-Clausemarine A (16)

##### (*S*)-*tert*-Butyldimethyl((2-methylpent-4-in-1-yl)oxy)silane (**S2**)

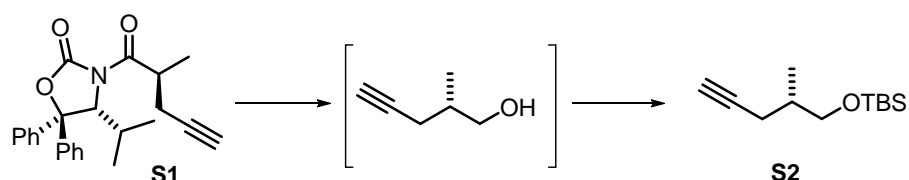

**S1**<sup>10,11,12</sup> (13.4 g, 35.8 mmol) was dissolved in THF (90 mL) and a solution of NaBH<sub>4</sub> (6.77 g, 179.0 mmol) in water (50 mL) was added dropwise. The mixture was stirred overnight at rt and then hydrolyzed with aqueous NH<sub>4</sub>Cl and water. The solvent was removed in vacuo and the precipitate was filtrated and washed with a small amount of MeOH to give the Evans auxiliary as a brownish solid which can be purified by recrystallization with MeOH. The filtrate was extracted with Et<sub>2</sub>O several times and the combined organic phases were dried with MgSO<sub>4</sub>, filtrated and the solvent was removed under reduced pressure (max. down to 200 mbar) to give the (*S*)-2-methylpent-4-in-1-ol which was converted without further purification.

The alcohol was dissolved in dry DMF (30 mL) under an Ar atmosphere and imidazole (4.60 g, 67.6 mmol) and *tert*-Butyldimethylsilyl chloride (4.27 g, 28.3 mmol) were added at 0 °C. After 2 h at rt water was added and the phases were separated. The aqueous phase was extracted with Et<sub>2</sub>O several times, dried with MgSO<sub>4</sub>, filtrated and the solvent was removed in vacuo. After purification by column chromatography (SiO<sub>2</sub>, cyclohexane/EtOAc, 5:1) **S2** (4.82 g, 22.7 mmol, 63% over 2 steps) was given as colorless oil. <sup>1</sup>H NMR (500MHz, CDCl<sub>3</sub>) δ = 3.52 (dd, *J* = 5.7, 9.9 Hz, 1H), 3.48 (dd, *J* = 6.5, 9.6 Hz, 1H), 2.30 (ddd, *J* = 2.7, 6.1, 16.8 Hz, 1H), 2.13 (ddd, *J* = 2.7, 6.9, 16.8 Hz, 1H), 1.94 (t, *J* = 2.7 Hz, 1H), 1.85 (qd, *J* = 6.3, 12.8 Hz, 1H), 0.98 (d, *J* = 6.9 Hz, 3H), 0.90 (s, 9H), 0.06 (s, 6H); <sup>13</sup>C NMR (125MHz, CDCl<sub>3</sub>) δ = 83.3, 69.2, 66.9, 35.3, 27.1, 26.1, 22.2, 18.5, 16.1, -5.2, -5.3. Known compound.<sup>[13]</sup>

<sup>10</sup> Brenner, M.; La Vecchia, L.; Leutert, T.; Seebach, D., *Org. Synth., Coll. Vol. 11*, **2009**, 896–902.

<sup>11</sup> Hintermann, T.; Seebach, D., *Helv. Chim. Acta* **1998**, *81*, 2093–2126.

<sup>12</sup> Sawant, P.; Maier, M. E., *Synlett* **2011**, *20*, 3002–3004.

<sup>13</sup> Ireland, R. E.; Liu, L.; Roper, T. D. *Tetrahedron* **1997**, *53*, 13221–13256.

**(6*S*)-7-((*tert*-Butyldimethylsilyl)oxy)-6-methylhept-3-yn-2-ol (S3):**

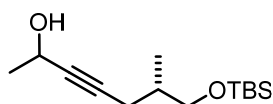

Under an Ar atmosphere, alkyne **S2** (1.80 g, 8.47 mmol) was dissolved in dry THF (10 mL). At  $-78^{\circ}\text{C}$  *n*BuLi (4.40 mL, 10.2 mmol, 2.5M in hexane) was added and the solution was stirred for 30 min. Then acetaldehyde (0.72 mL, 12.7 mmol) was added and the solution was warmed up to  $0^{\circ}\text{C}$  during 1 h. Then aqueous  $\text{NH}_4\text{Cl}$  and  $\text{Et}_2\text{O}$  were added and the phases were separated. The aqueous phase was extracted with  $\text{Et}_2\text{O}$  several times and the combined organic phases were dried with  $\text{MgSO}_4$ , filtrated and the solvent was evaporated in vacuo. After purification by column chromatography ( $\text{SiO}_2$ , cyclohexane/ $\text{EtOAc}$ , 2:1) **S3** (1.69 g, 6.60 mmol, 78%) was isolated as colorless oil.  $^1\text{H}$  NMR (200MHz,  $\text{CDCl}_3$ )  $\delta$  = 4.60-4.43 (m, 1H), 3.48 (dd,  $J$  = 2.2, 6.1 Hz, 2H), 2.31 (ddd,  $J$  = 2.2, 5.9, 16.9 Hz, 1H), 2.12 (ddd,  $J$  = 2.2, 6.8, 16.6 Hz, 1H), 1.93-1.69 (m, 2H), 1.44 (d,  $J$  = 6.6 Hz, 3H), 0.96 (d,  $J$  = 6.8 Hz, 3H), 0.90 (s, 9H), 0.05 (s, 6H);  $^{13}\text{C}$  NMR (50MHz,  $\text{CDCl}_3$ )  $\delta$  = 83.3, 83.3, 66.9, 58.8, 51.7, 35.4, 26.1, 24.9, 22.4, 18.5, 16.2, -5.2; IR (neat):  $\nu$  = 3347, 2955, 2930, 2857, 1471, 1253  $\text{cm}^{-1}$ ; HRMS: calcd for  $\text{C}_{14}\text{H}_{29}\text{O}_2\text{Si}$   $[\text{M}+\text{H}]^+$ : 257.1931.; found: 257.1939.

**(6*S*)-7-Hydroxy-6-methylhept-3-yn-2-ylacetate (S4):**

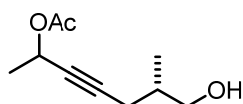

**S3** (1.13 g, 4.41 mmol) was dissolved in DCM (110 mL) under an Ar atmosphere and  $\text{Ac}_2\text{O}$  (0.87 mL, 9.25 mmol),  $\text{Et}_3\text{N}$  (1.28 mL, 9.25 mmol) and DMAP (108 mg, 0.88 mmol) were added at rt. After 3 h the reaction was hydrolyzed with diluted HCl. The organic phase was washed with aqueous  $\text{NaHCO}_3$  and the aqueous phase was extracted with DCM several times. The combined organic phases were dried with  $\text{MgSO}_4$ , filtrated and the solvent was removed in vacuo. The product was identified as colorless oil, which was converted without further purification.

Under Ar atmosphere the silyl ether was dissolved in dry THF (15 mL) and TBAF (4.86 mL, 4.86 mmol, 1M in THF) was added at  $0^{\circ}\text{C}$ . After 3 h at rt THF was removed in vacuo. After purification by column chromatography ( $\text{SiO}_2$ , cyclohexane/ $\text{EtOAc}$ , 10:1, 7:1) **S4** (716 mg, 3.88 mmol, 88% over 2 steps) was given as colorless oil.  $^1\text{H}$  NMR (200MHz,  $\text{C}_6\text{D}_6$ )  $\delta$  = 5.52 (tq,  $J$  = 1.6, 6.6 Hz, 1H), 3.34 (d,  $J$  = 6.1 Hz, 2 H), 2.36 (br. s., 1H), 2.20 (ddd,  $J$  = 1.8, 6.0, 16.9 Hz, 1H), 2.05 (ddd,  $J$  = 2.0, 6.6, 16.6 Hz, 1H), 1.81-1.66 (m,  $J$  = 7.6 Hz, 1H), 1.64 (s, 3H), 1.31 (d,  $J$  = 6.6 Hz, 3H), 0.88 (d,  $J$  = 6.8 Hz, 3H);  $^{13}\text{C}$  NMR (50MHz,  $\text{C}_6\text{D}_6$ )  $\delta$  = 169.9, 84.3, 81.0, 66.9, 61.3, 35.8, 23.0, 22.1, 21.0, 16.6; IR (neat):  $\nu$  = 3462, 2985, 2962, 2936, 2876, 1733, 1450, 1372, 1234  $\text{cm}^{-1}$ ; HRMS: calcd for  $\text{C}_{10}\text{H}_{20}\text{O}_3\text{N}$   $[\text{M}+\text{NH}_4]^+$ : 202.1434.; found: 202.1439.

**(2*S*)-6-Hydroxy-2-methylhept-4-ynoic acid (17):**

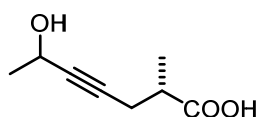

**S4** (745 mg, 4.04 mmol) was dissolved in dry DMSO (15 mL) under an Ar atmosphere and IBX (3.40 g, 12.13 mmol) was added. After 3 h at rt the solution was added to an ice/water bath and the precipitate was removed by filtration. The filtrate was extracted with  $\text{Et}_2\text{O}$  several times. The combined organic phases were dried with  $\text{MgSO}_4$ , filtrated and the solvent was removed in vacuo. The product was given as colorless oil and was converted without further purification.

The aldehyde was dissolved in 2-methyl-2-butene (3.66 mL, 34.4 mmol) and *t*BuOH (90 mL) and then a solution of  $\text{NaClO}_2$  (3.51 g, 38.8 mmol) and  $\text{NaH}_2\text{PO}_4$  (3.53 g, 29.4 mmol) in water (25 mL) was added. After 1 h at rt a pH value of 8 was adjusted by addition of diluted NaOH and *t*BuOH was removed in vacuo. Then water and brine were added and the solution was extracted with cyclohexane once. Then the pH value was adjusted at 3 by addition of diluted HCl and the aqueous phase was extracted with  $\text{EtOAc}$  several times. The combined  $\text{EtOAc}$  phases were dried with  $\text{MgSO}_4$ , filtrated and the solvent was removed in vacuo. After purification by column chromatography ( $\text{SiO}_2$ , cyclohexane/ $\text{EtOAc}$ , 5:1, 1:1) **17** (380 mg, 2.43 mmol, 60% over

2 steps) was given as colorless oil.  $^1\text{H}$  NMR (200MHz,  $\text{C}_6\text{D}_6$ )  $\delta$  = 6.60 (br. s., 1H), 4.32 (tq,  $J$  = 1.7, 6.6 Hz, 1H), 2.48-2.14 (m, 3H), 1.30 (d,  $J$  = 6.6 Hz, 3H), 1.05 (d,  $J$  = 6.8 Hz, 3H);  $^{13}\text{C}$  NMR (50MHz,  $\text{C}_6\text{D}_6$ )  $\delta$  = 181.3, 85.3, 81.3, 58.8, 39.4, 25.0, 25.0, 23.3, 16.4; IR (neat):  $\nu$  = 2980, 2937, 1705, 1461  $\text{cm}^{-1}$ ; HRMS: calcd for  $\text{C}_8\text{H}_{11}\text{O}_2$   $[(\text{M}+\text{H})-\text{H}_2\text{O}]^+$ : 139.0754.; found: 139.0754.

**(3S,Z)-5-(2-Hydroxypropyliden)-3-methyldihydrofuran-2-one (18):**

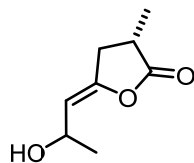

**17** (100 mg, 0.640 mmol) was dissolved in 1M triethylammonium acetate in water (2 mL) and THF (0.5 mL). Then catalyst **1a** (4.2 mg, 0.064 mmol) was added and the solution was stirred for 2 h. EtOAc was added and the phases were separated. The aqueous phase was extracted with EtOAc several times. The combined organic phases were dried with  $\text{MgSO}_4$ , filtrated and the solvent was removed in vacuo. After purification by column chromatography ( $\text{SiO}_2$ , cyclohexane/EtOAc, 2:1) **18** (77 mg, 0.493 mmol, 77%) was given as colorless oil.  $^1\text{H}$  NMR (300MHz,  $\text{C}_6\text{D}_6$ , major diastereomer\*,  $dr$  = 60:40)  $\delta$  = 4.81 (td,  $J$  = 6.6, 12.8 Hz, 1H), 4.50-4.41 (m, 1H), 2.19-1.86 (m, 3H), 1.68 (ddd,  $J$  = 2.2, 8.1, 15.4 Hz, 1H), 1.61\* (ddd,  $J$  = 1.5, 7.7, 15.0 Hz, 1H), 1.75-1.55 (m, 1H), 1.24 (d,  $J$  = 6.6 Hz, 3H), 0.82 (d,  $J$  = 6.6 Hz, 3H), 0.80\* (d,  $J$  = 6.6 Hz, 3H);  $^{13}\text{C}$  NMR (75MHz,  $\text{C}_6\text{D}_6$ )  $\delta$  = 177.10\*, 177.06, 147.2, 147.1\*, 109.9, 63.08\*, 63.05, 34.34, 34.29\*, 33.5\*, 33.4, 24.3, 15.9\*, 15.8; IR (neat):  $\nu$  = 3376, 2973, 1794, 1704, 1457, 1196  $\text{cm}^{-1}$ ; HRMS: calcd for  $\text{C}_8\text{H}_{12}\text{O}_3\text{Na}$   $[\text{M}+\text{Na}]^+$ : 179.0679.; found: 179.0680.

**(3S,5S)-3-Methyl-5-(2-oxopropyl)dihydrofuran-2-one (19):**

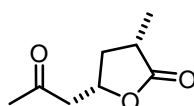

**18** (440 mg, 2.81 mmol) was dissolved in dry MeOH (10 mL) under  $\text{H}_2$  atmosphere and Pd/C (300 mg) was added. The solution was stirred overnight at rt and the catalyst was removed by filtration over celite. The solvent was evaporated in vacuo and the product was converted without further purification.

The alcohol was dissolved in dry DMSO (10 mL) under an Ar atmosphere and IBX (2.36 g, 8.43 mmol) was added. The solution was stirred overnight and then poured into iced water. The precipitate was removed by filtration and the filtrate was extracted with  $\text{Et}_2\text{O}$  several times. The combined organic phases were dried with  $\text{MgSO}_4$ , filtrated and the solvent was removed in vacuo. After purification by column chromatography ( $\text{SiO}_2$ , cyclohexane/EtOAc, 1:1), **19** (180 mg, 1.15 mmol, 41% over 2 steps) was given as yellowish oil.  $^1\text{H}$  NMR (500MHz,  $\text{C}_6\text{D}_6$ )  $\delta$  = 4.19 (ddd,  $J$  = 5.4, 10.7, 11.9 Hz, 1H), 2.21 (dd,  $J$  = 6.5, 16.8 Hz, 1H), 1.96-1.86 (m, 1H), 1.83-1.78 (m, 1H), 1.75 (dd,  $J$  = 6.1, 17.2 Hz, 1H), 1.57 (s, 3H), 0.95 (d,  $J$  = 6.9 Hz, 3H), 0.75 (dt,  $J$  = 10.5, 12.1 Hz, 1H);  $^{13}\text{C}$  NMR (125MHz,  $\text{C}_6\text{D}_6$ )  $\delta$  = 203.6, 178.0, 73.5, 48.6, 37.5, 35.7, 30.3, 15.4; IR (neat):  $\nu$  = 2975, 2936, 2879, 1760, 1714, 1455, 1378, 1356  $\text{cm}^{-1}$ ; HRMS: calcd for  $\text{C}_8\text{H}_{12}\text{O}_3\text{Na}$   $[\text{M}+\text{Na}]^+$ : 179.0679.; found: 179.0681.

**(3S,5S)-5-(4-Bromo-2-methylbut-2-en-1-yl)-3-methyldihydrofuran-2-one (20):**

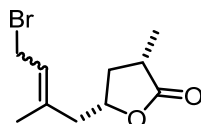

**19** (120 mg, 0.768 mmol) was dissolved in dry THF (1 mL) under an Ar atmosphere and vinylmagnesium bromide (1.65 mL, 1.15 mmol, 0.7M in THF) was added. The turbid solution was hydrolyzed after 30 min by addition of aqueous  $\text{NH}_4\text{Cl}$ , the phases were separated and the aqueous phase was extracted with EtOAc several times. The combined organic phases were dried with  $\text{MgSO}_4$ , filtrated and the solvent was removed in vacuo. The product was converted without further purification.

The tertiary alcohol was dissolved in dry  $\text{Et}_2\text{O}$  (3 mL) and  $\text{PBr}_3$  (130  $\mu\text{L}$ , 1.38 mmol) was added at 0  $^\circ\text{C}$ . After 30 min  $\text{Et}_2\text{O}$  was added and the solution was hydrolyzed by addition of aqueous  $\text{NaHCO}_3$ . The phases were separated and the organic phase was washed with brine, dried with  $\text{MgSO}_4$ , filtrated and the solvent was removed in vacuo. After purification by column chromatography ( $\text{SiO}_2$ , cyclohexane/EtOAc, 3:1), **20** (58 mg,

0.235 mmol, 31% over 2 steps, *E/Z* = 60:40) was given as yellowish oil <sup>1</sup>H NMR (500MHz, C<sub>6</sub>D<sub>6</sub>, major diastereomer\*, *dr* = 60:40)  $\delta$  = 5.34\* (t, *J* = 8.6 Hz, 1H), 5.24 (t, *J* = 8.4 Hz, 1H), 3.72-3.46 (m, 3H), 2.04\* (dd, *J* = 7.6, 14.1 Hz, 1H), 1.95 (dd, *J* = 7.5, 14.3 Hz, 1H), 1.92-1.85 (m, *J* = 7.3 Hz, 1H), 1.81\* (dd, *J* = 5.2, 14.3 Hz, 1H), 1.65 (dd, *J* = 5.5, 14.3 Hz, 1H), 1.56\* (s, 3H), 1.50-1.45 (m, *J* = 6.9 Hz, 1H), 1.43 (s, 3H), 0.98\* (d, *J* = 6.9 Hz, 3H), 0.97 (d, *J* = 7.3 Hz, 3H), 0.86-0.74 (m, 1H); <sup>13</sup>C NMR (125MHz, C<sub>6</sub>D<sub>6</sub>)  $\delta$  = 177.8, 177.7\*, 138.3, 138.0\*, 124.7\*, 124.2, 75.9, 75.8\*, 45.0, 37.3\*, 37.1, 35.9\*, 35.7, 28.5\*, 28.3, 24.2, 15.2, 15.1\*; IR (neat):  $\nu$  = 2972, 2932, 2877, 1769, 1453 cm<sup>-1</sup>; HRMS: calcd for C<sub>10</sub>H<sub>15</sub>O<sub>2</sub> [M-Br]<sup>+</sup>: 167.0167.; found: 167.1070

### 2-*epi*-Clausemarine A (**16**)

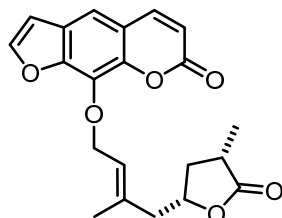

**16** (40 mg, 0.162 mmol) was dissolved in dry acetone (2 mL) under an Ar atmosphere and xanthotoxol (33 mg, 0.162 mmol) and dry K<sub>2</sub>CO<sub>3</sub> (22 mg, 0.162 mmol) were added. The solution was heated to reflux overnight. After cooling to rt the solution was neutralized with 10% citric acid and the solvent was removed in vacuo. The residue was dissolved in DCM and water was added. The phases were separated and the aqueous phase was extracted with DCM several times. The combined organic phases were dried with MgSO<sub>4</sub>, filtrated and the solvent was removed in vacuo. After purification by column chromatography (SiO<sub>2</sub>, cyclohexane/EtOAc, 2:1), 2-*epi*-Clausemarine A **16** (27 mg, 0.073 mmol, 45%, *E/Z* = 80:20) was given as yellowish oil.  $[\alpha]_D^{20}$  = +16, *c* = 0.75, MeOH; <sup>1</sup>H NMR (500MHz, CDCl<sub>3</sub>, major diastereomer, *dr* = 80:20)  $\delta$  = 7.77 (d, *J* = 9.9 Hz, 1H), 7.70 (d, *J* = 2.3 Hz, 1H), 7.38 (s, 1H), 6.82 (d, *J* = 2.3 Hz, 1H), 6.36 (d, *J* = 9.6 Hz, 1H), 5.70 (t, *J* = 7.1 Hz, 1H), 5.08-4.98 (m, 2H), 4.40 (ddd, *J* = 5.7, 11.1, 12.1 Hz, 1H), 2.64-2.59 (m, 2H), 2.48 (dd, *J* = 7.3, 14.1 Hz, 1H), 2.37-2.31 (m, 1H), 2.28 (dd, *J* = 5.0, 13.4 Hz, 1H), 1.74 (s, 3H), 1.47-1.35 (m, 1H), 1.22 (s, 3H); <sup>13</sup>C NMR (125MHz, CDCl<sub>3</sub>)  $\delta$  = 179.3, 160.6, 148.8, 146.8, 144.5, 137.8, 131.5, 126.0, 123.4, 116.6, 114.8, 113.6, 106.9, 77.0, 69.7, 45.2, 37.2, 35.8, 17.2, 15.1; IR (neat):  $\nu$  = 2974, 2933, 2872, 1765, 1723, 1622, 1585, 1439, 1401 cm<sup>-1</sup>; HRMS: calcd for C<sub>21</sub>H<sub>21</sub>O<sub>6</sub> [M+H]<sup>+</sup>: 369.1333.; found: 369.1350. Signals, which could be assigned to the minor diastereomer: <sup>1</sup>H NMR (500MHz, CDCl<sub>3</sub>)  $\delta$  = 5.82 (t, *J* = 7.1 Hz, 1H), 4.98-4.90 (m, 2H), 4.52 (tdd, *J* = 5.4, 7.6, 10.6 Hz, 1H), 1.28-1.25 (m, 3H).

## 5. NMR-spectra

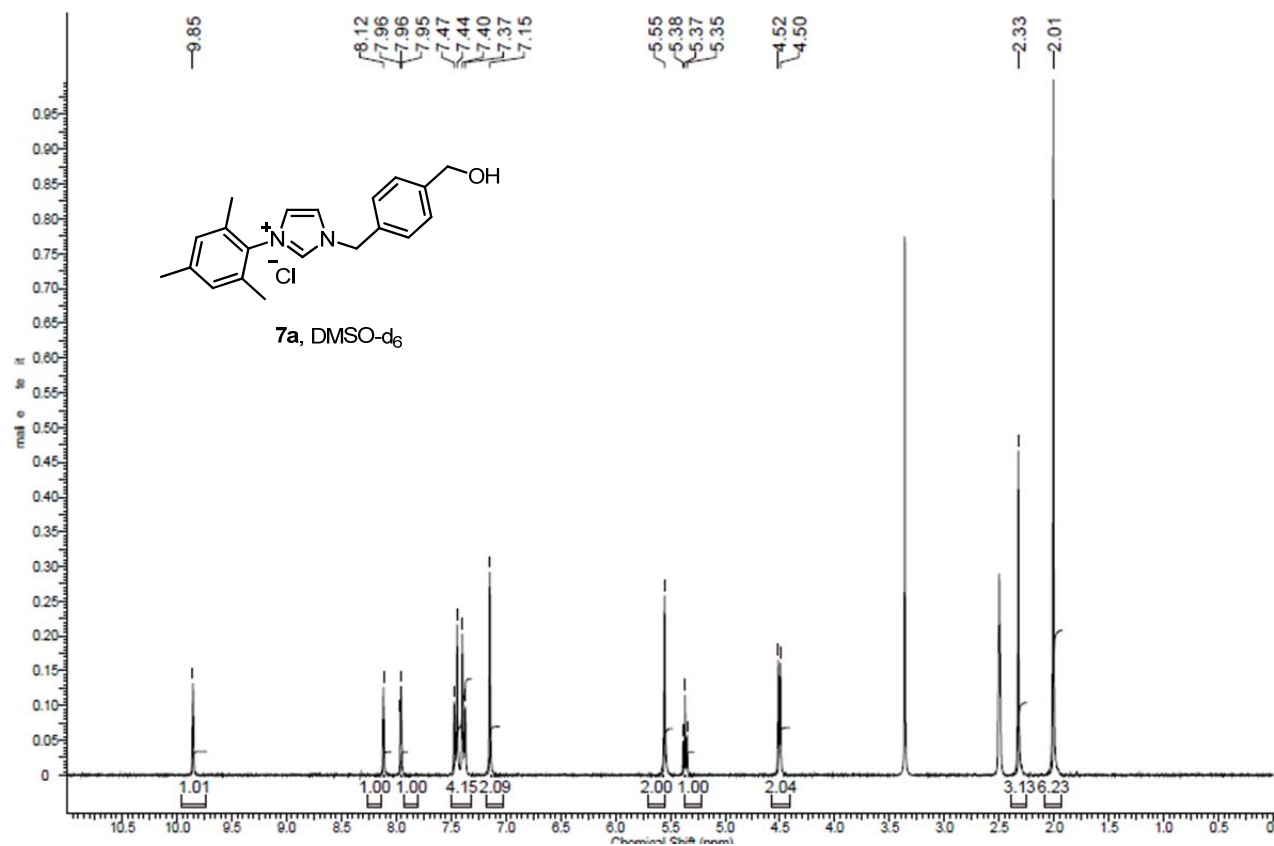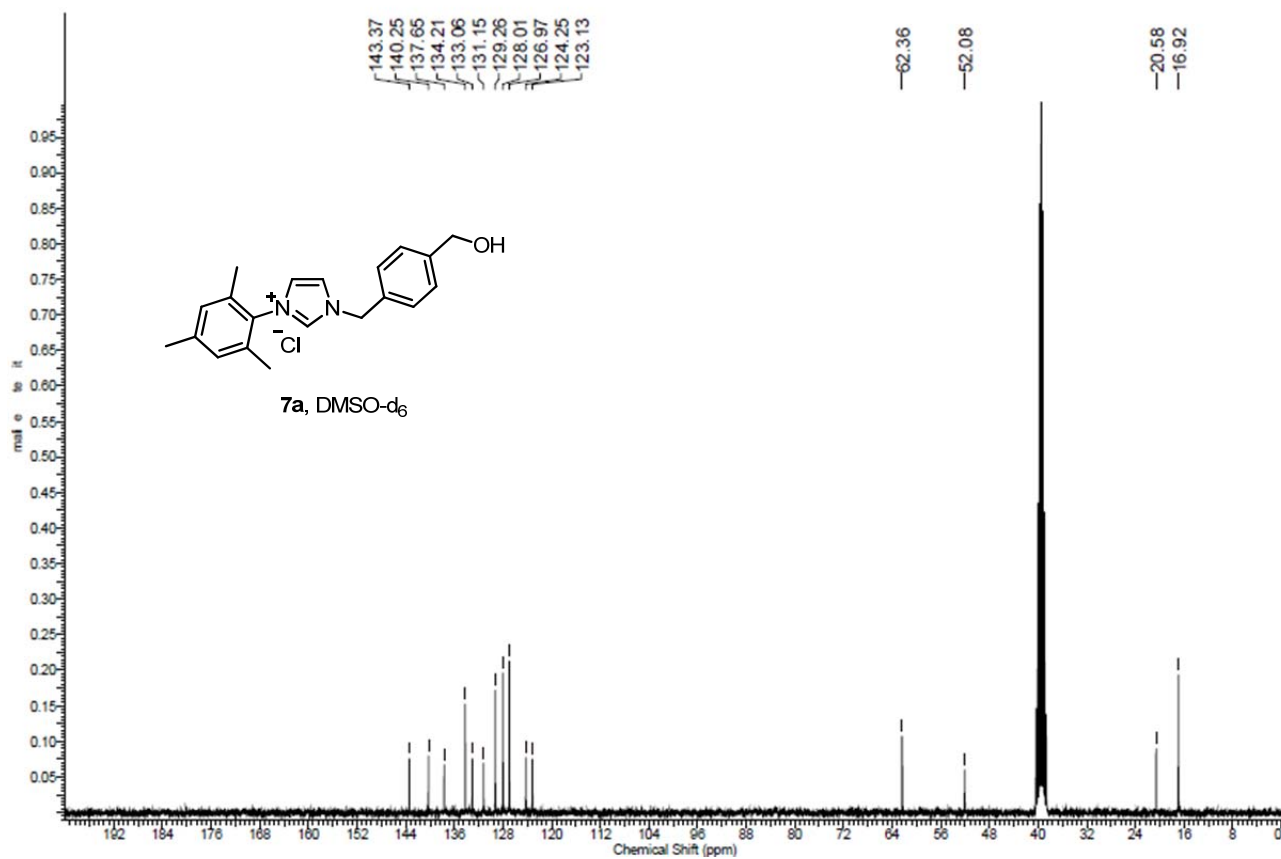



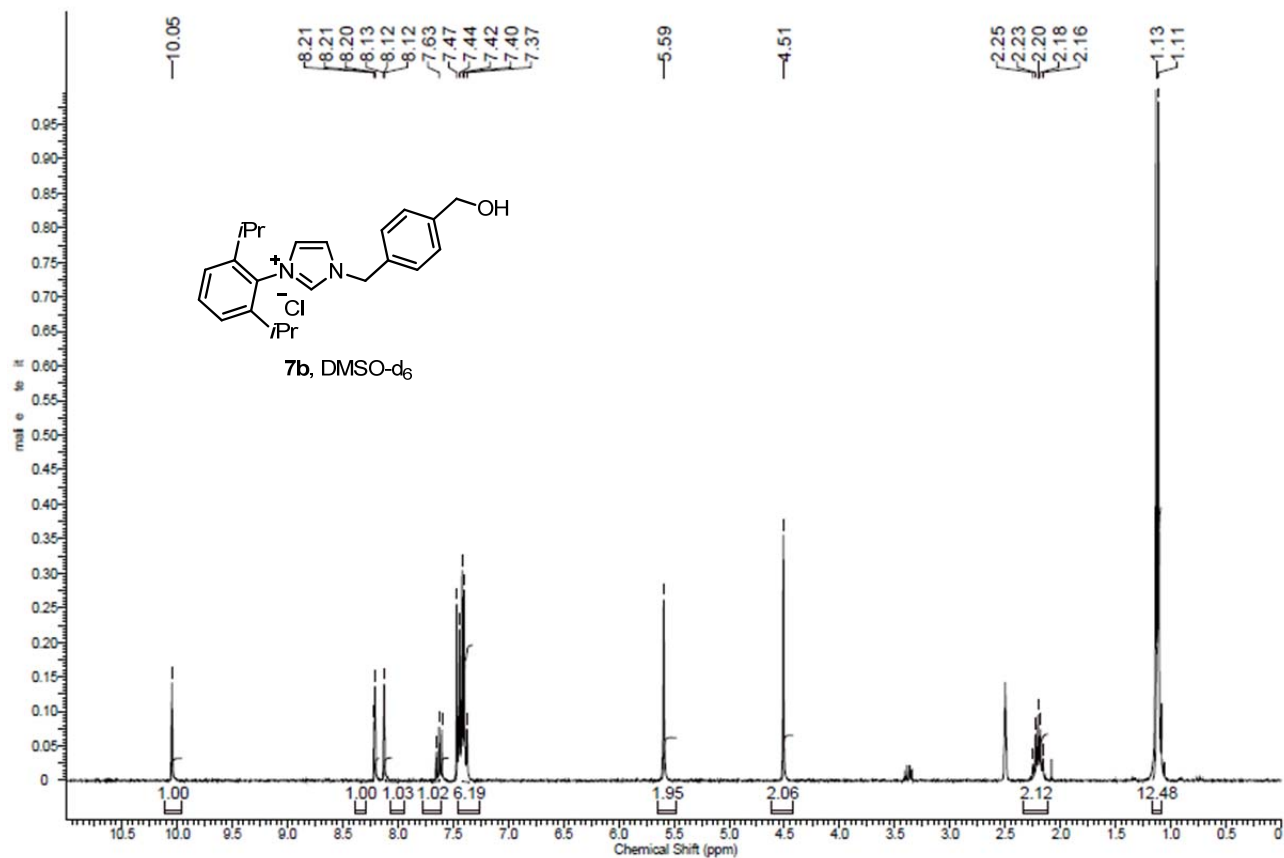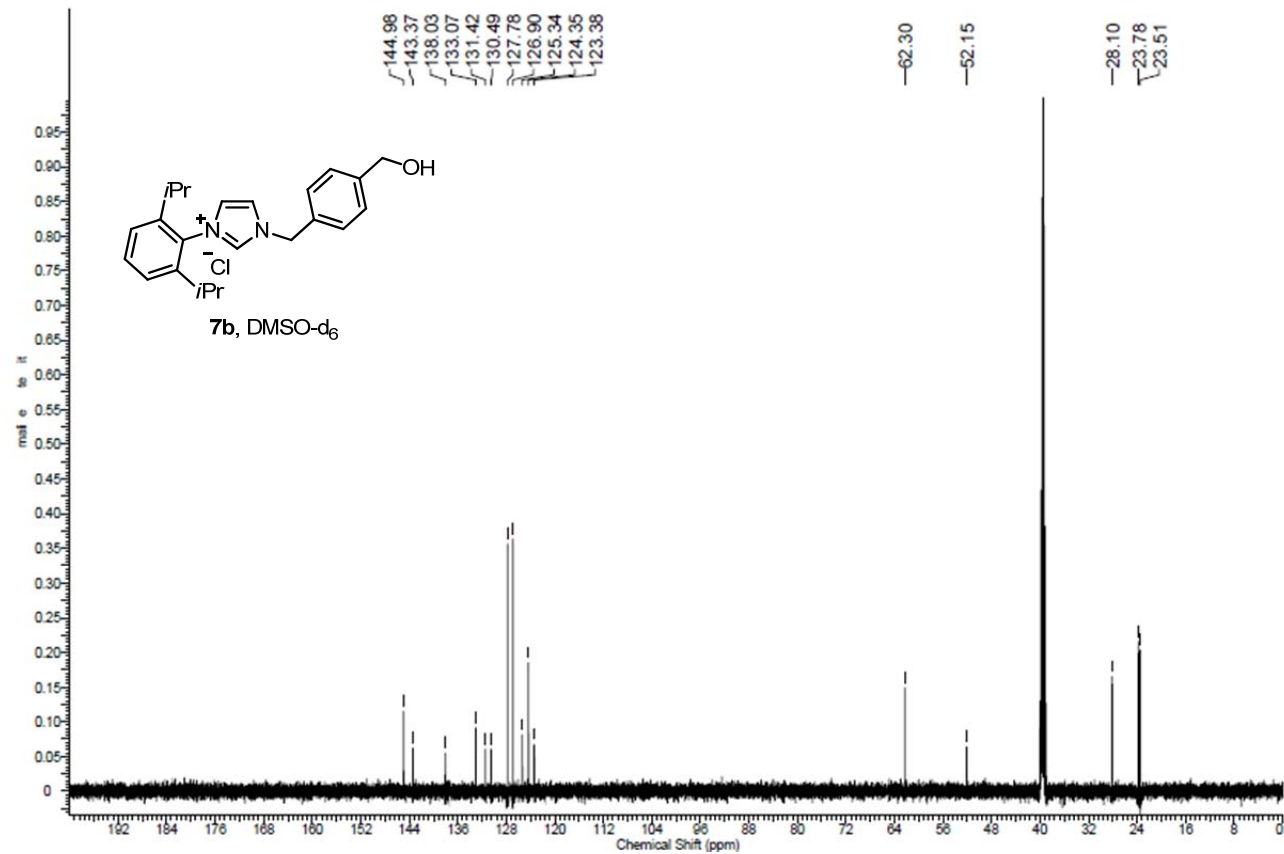

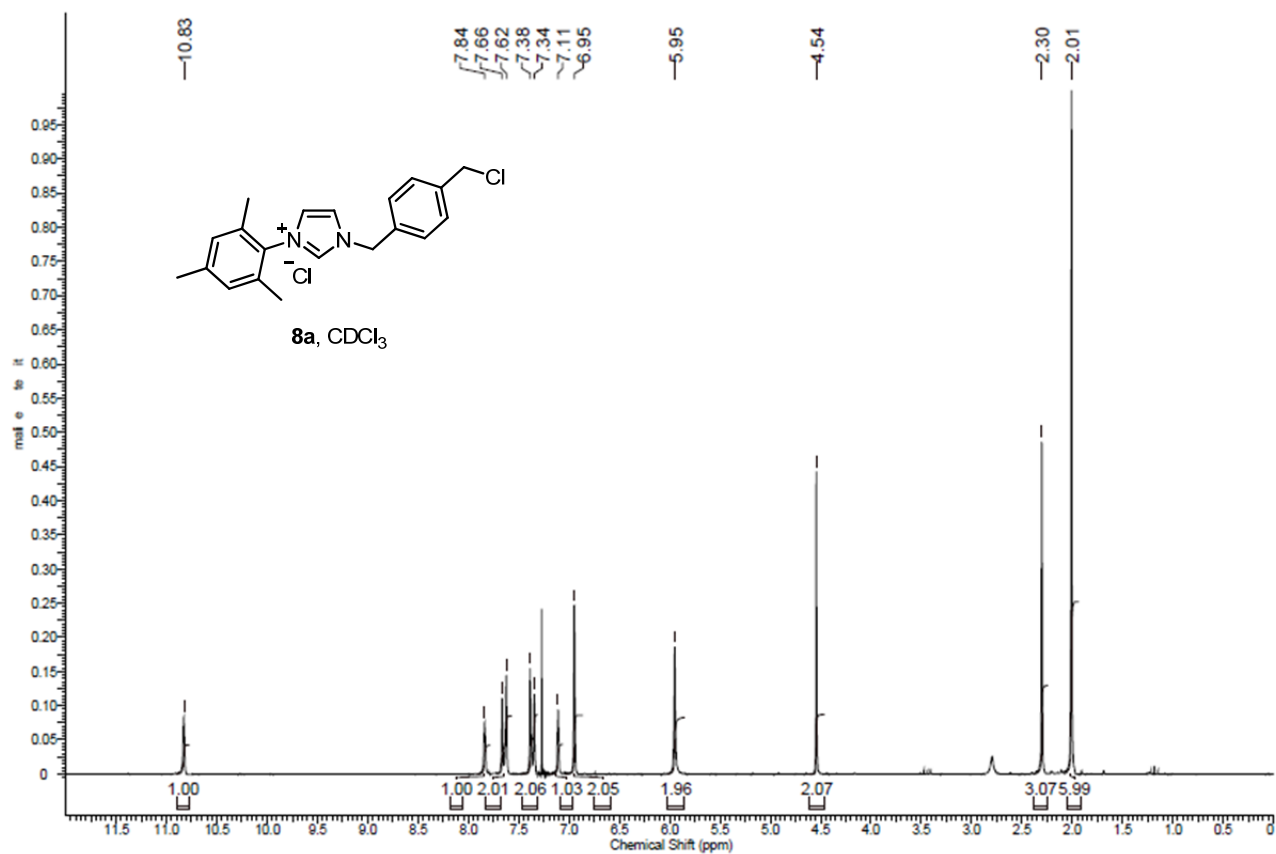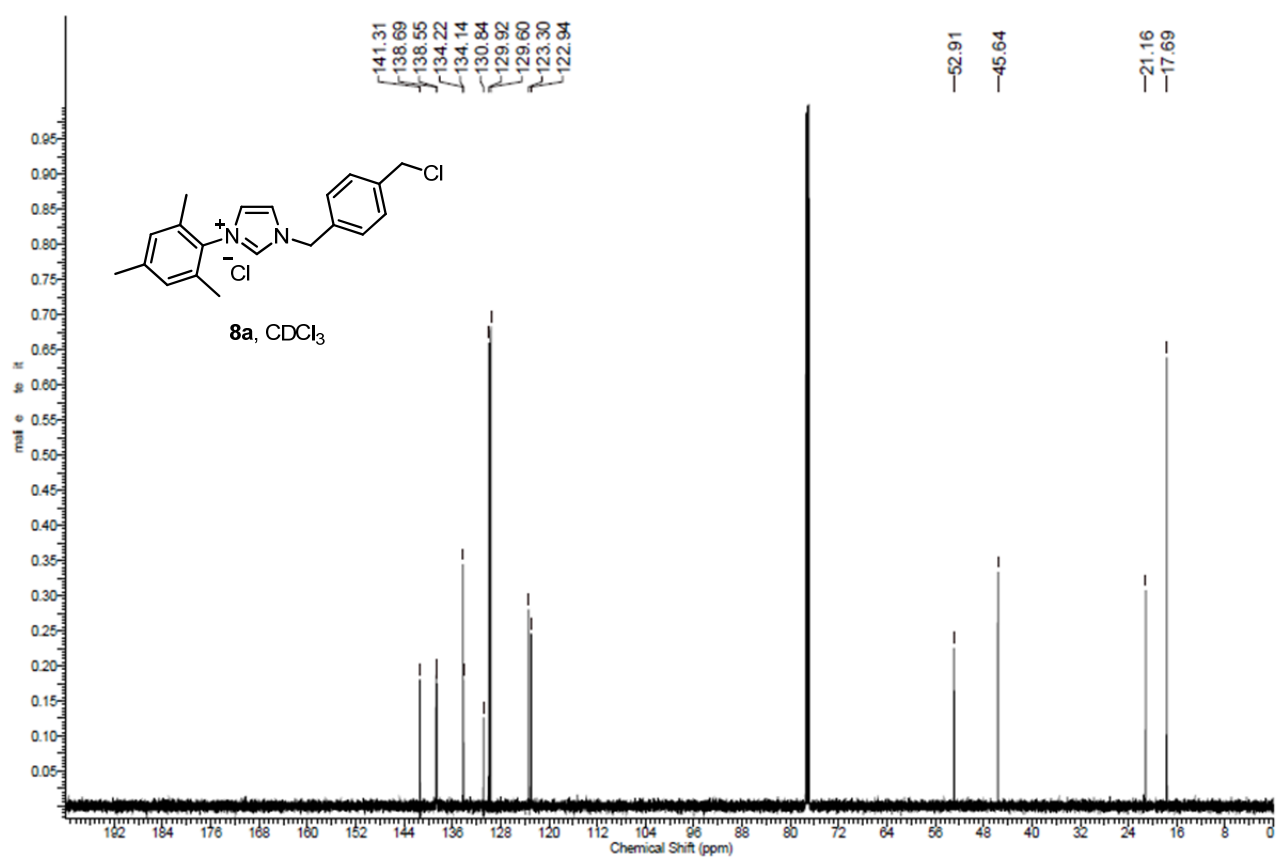

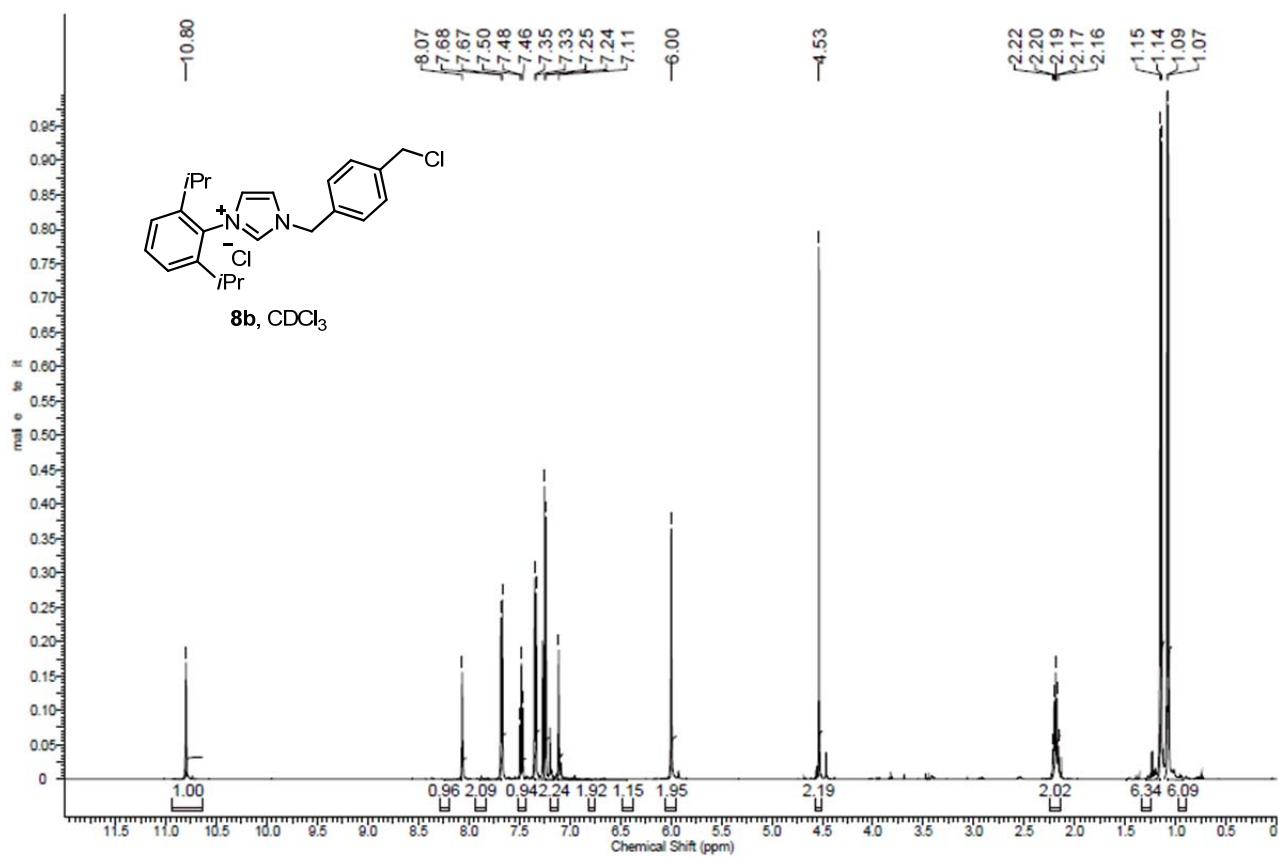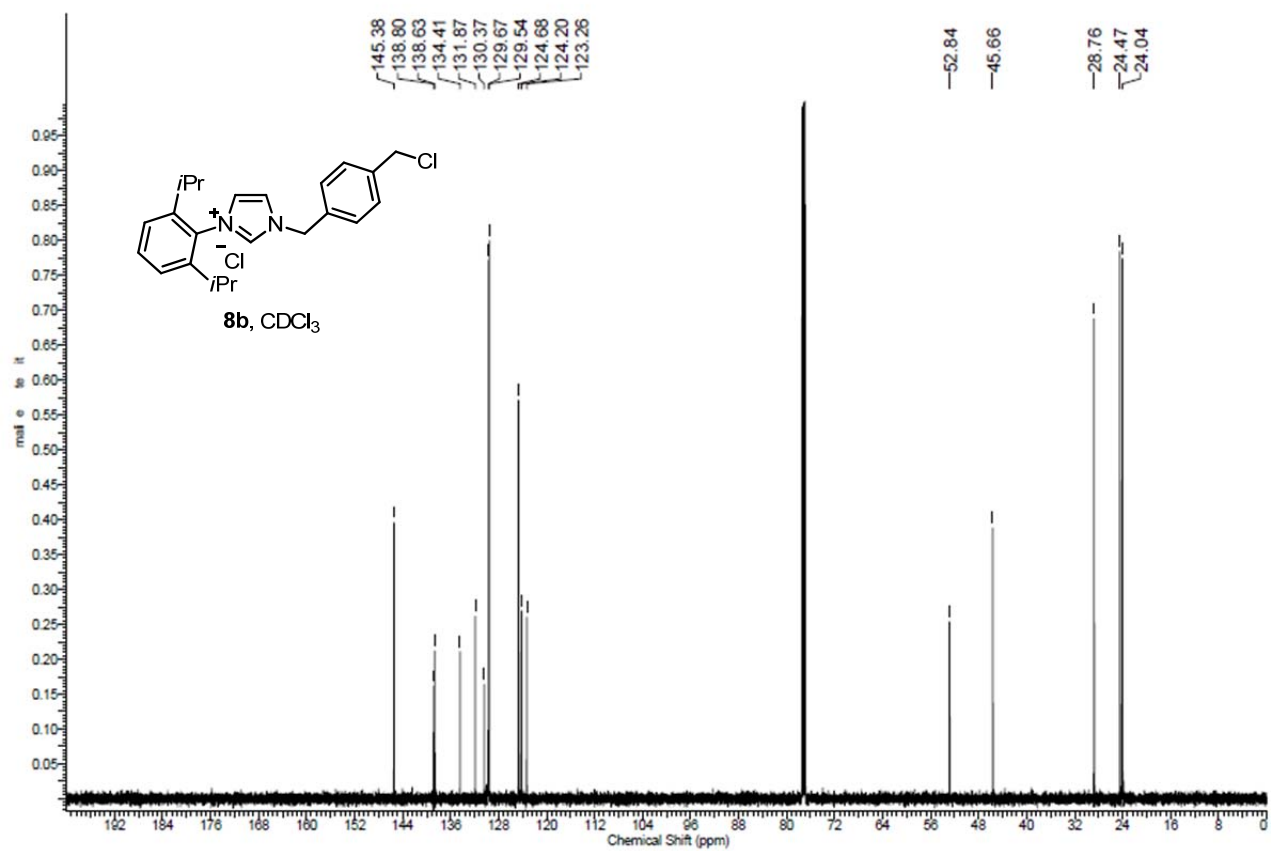

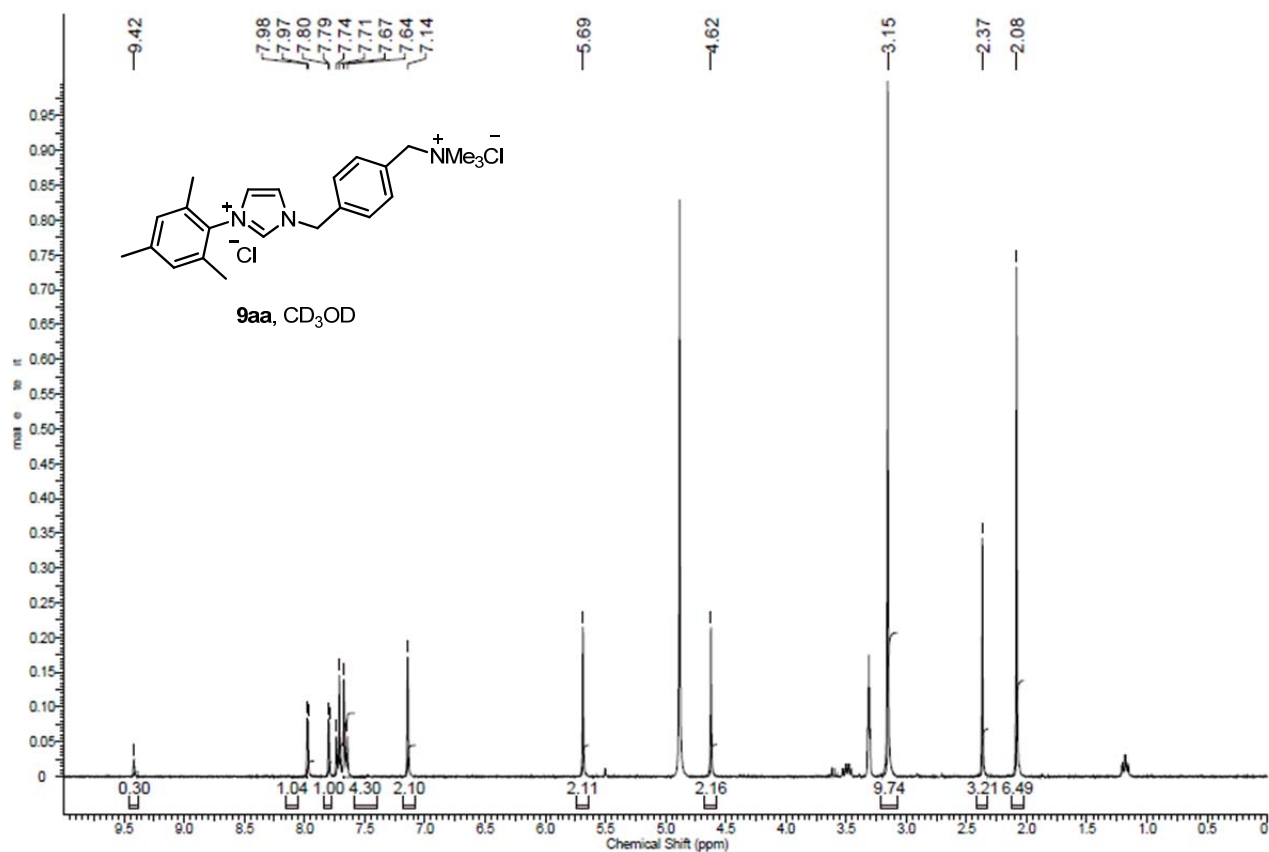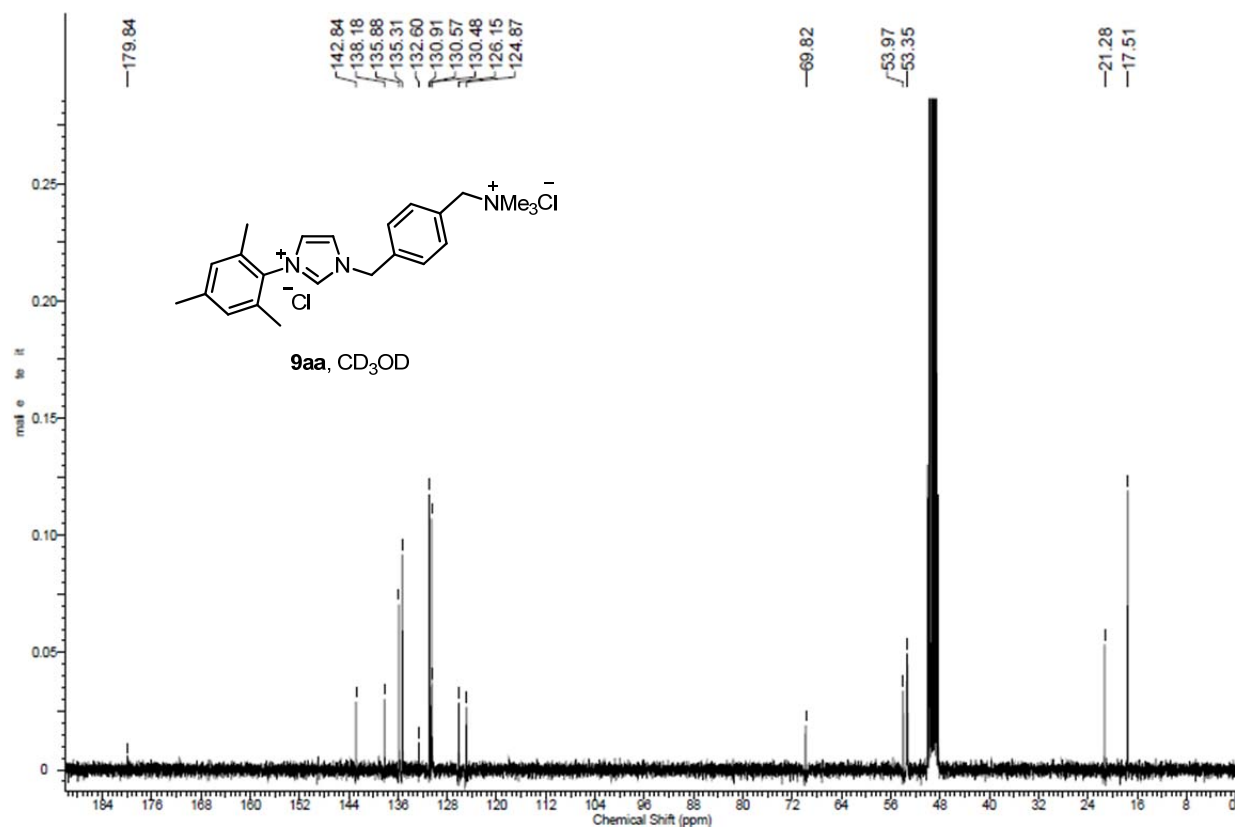

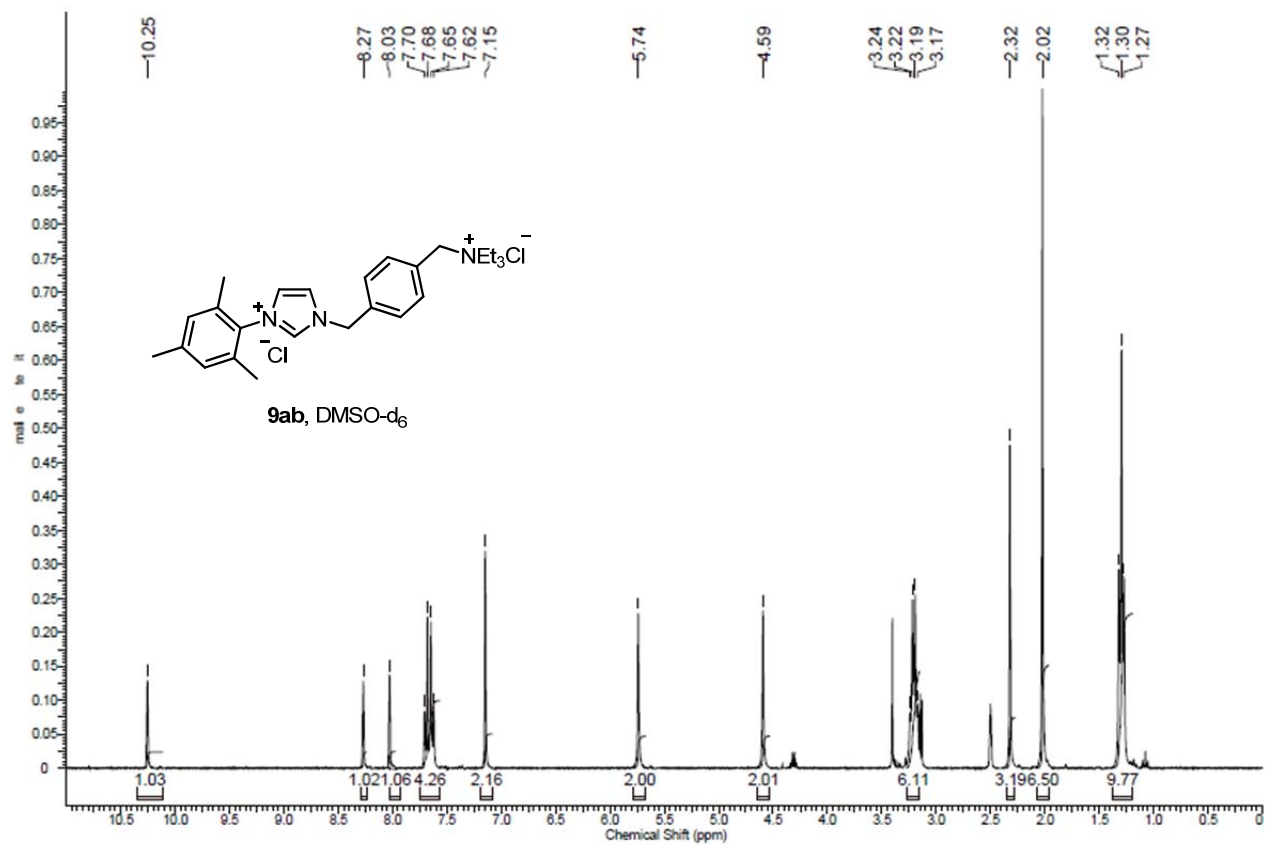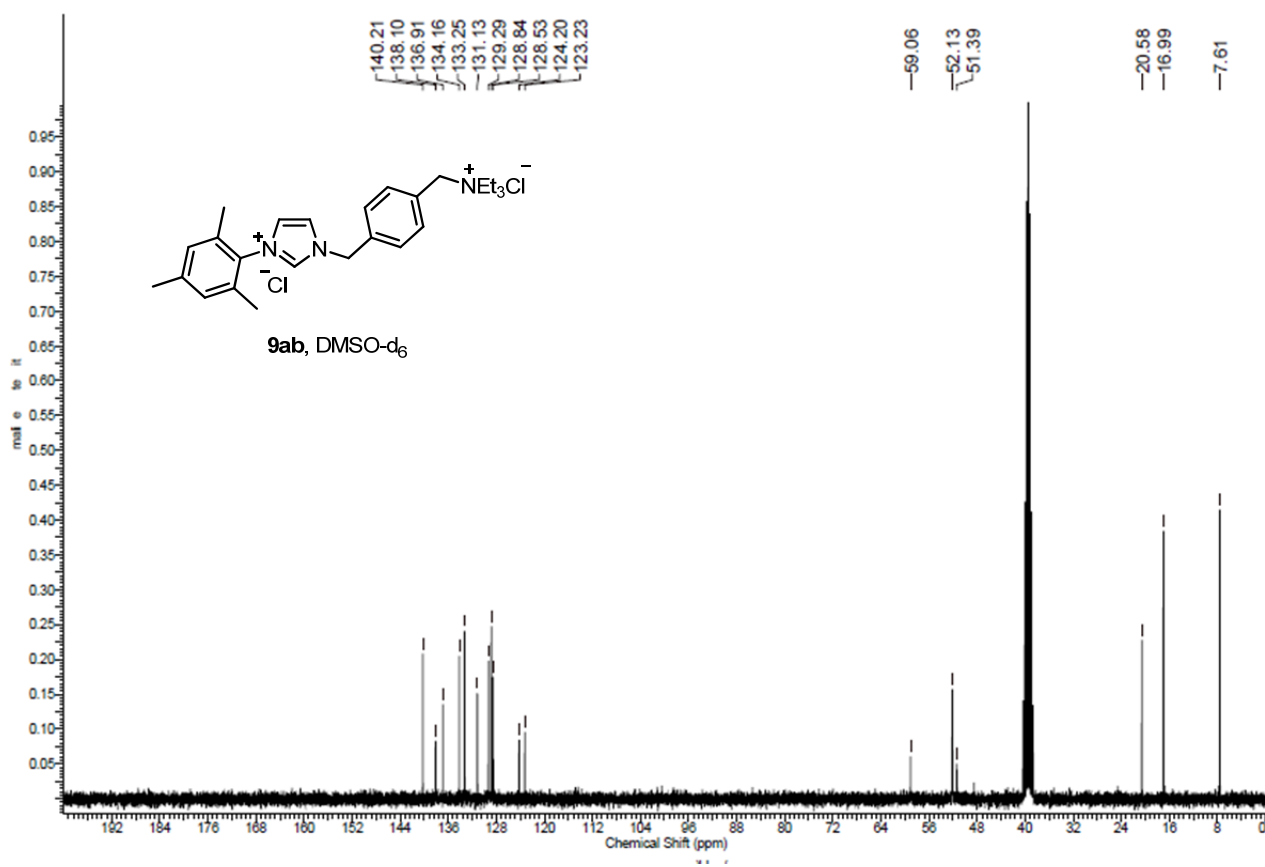

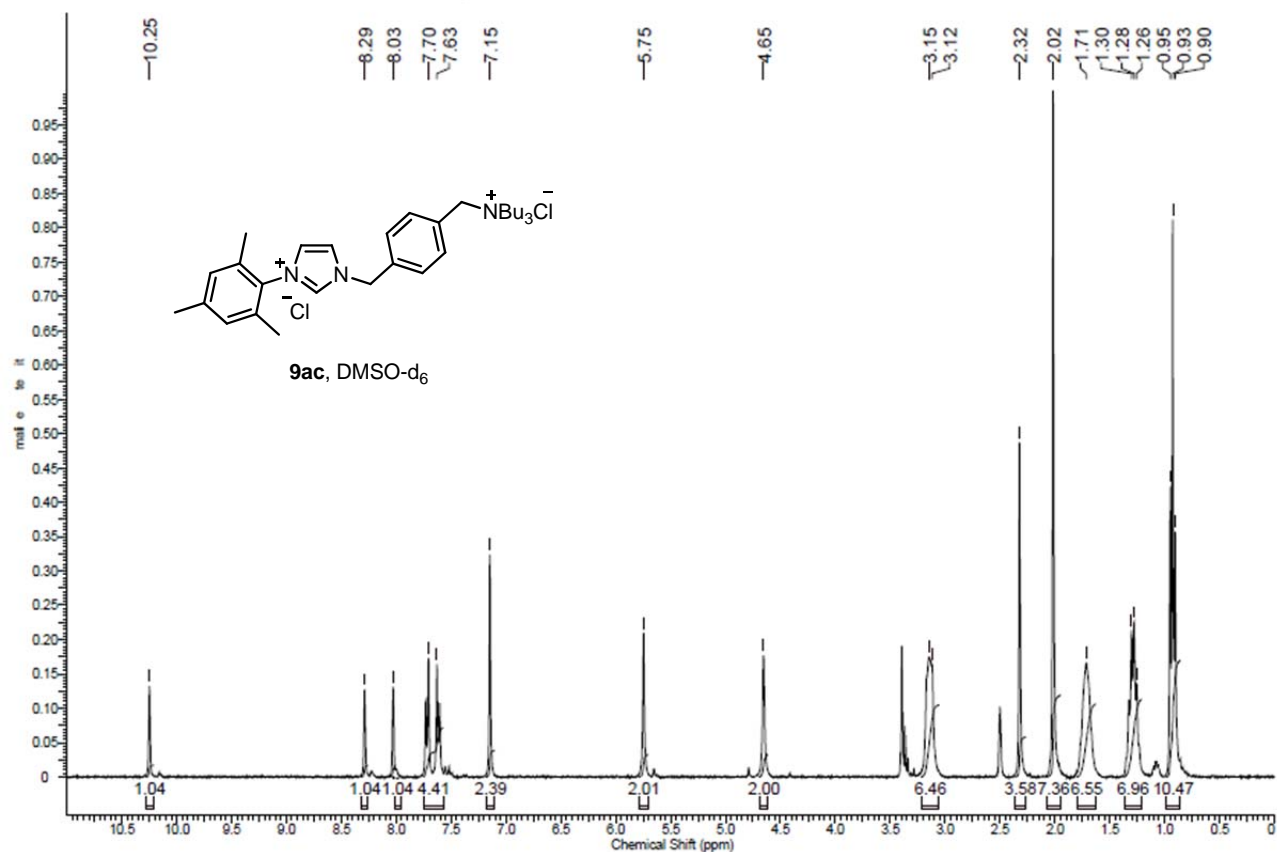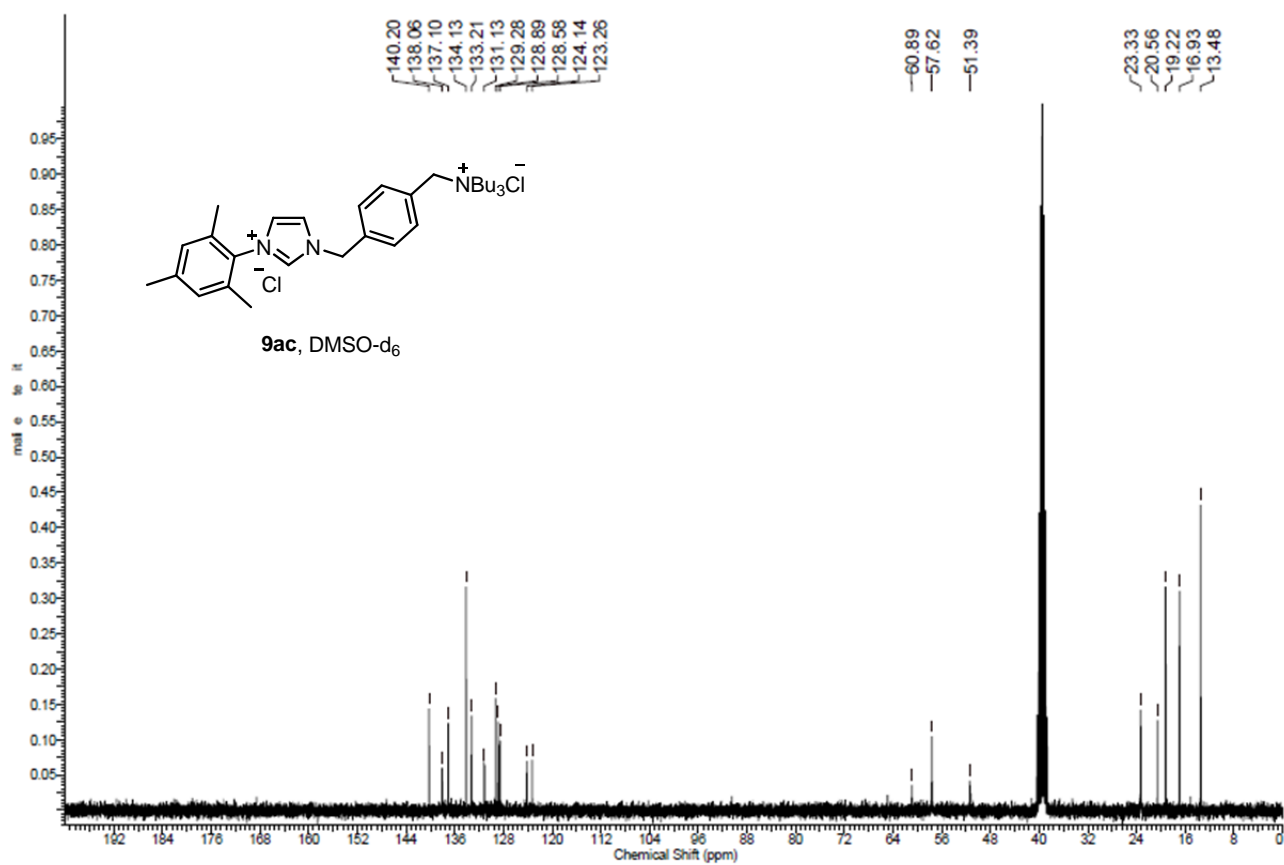

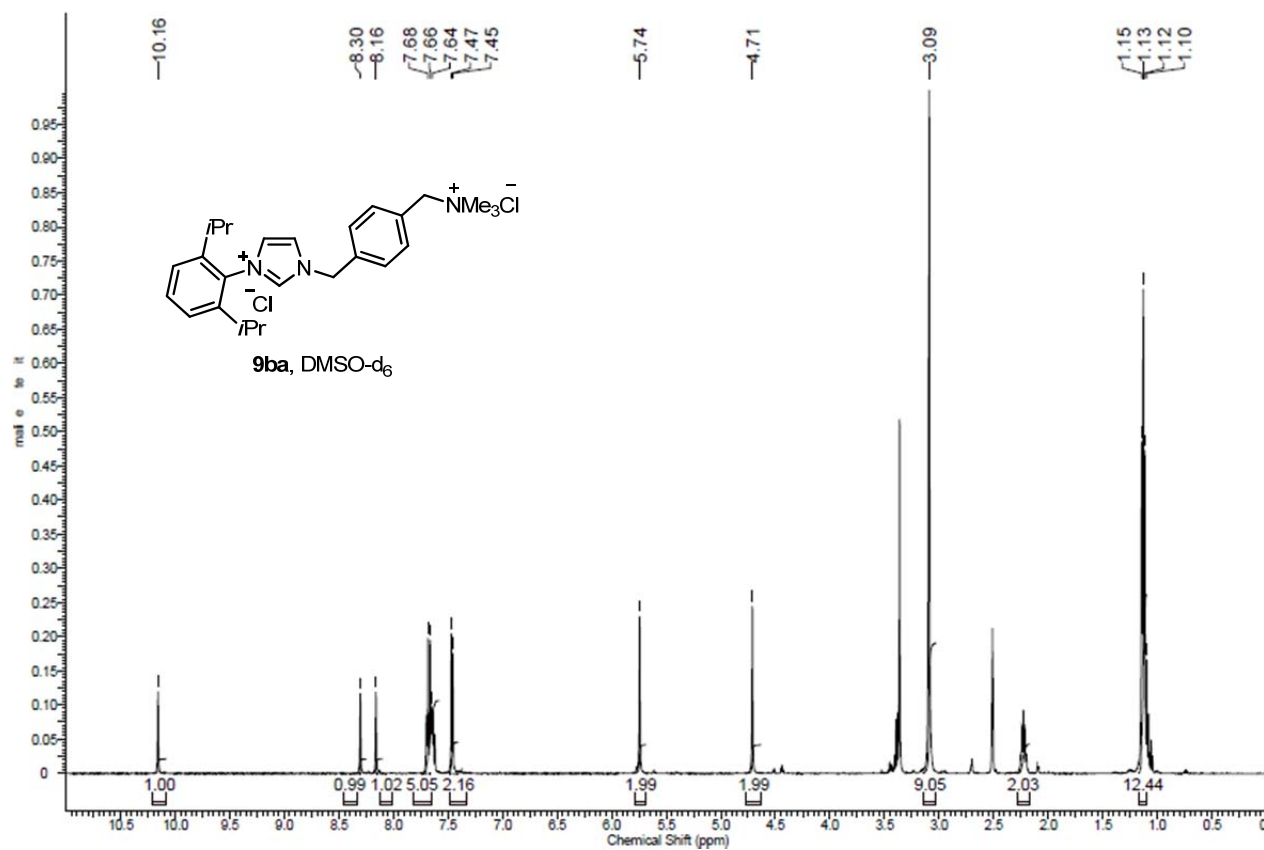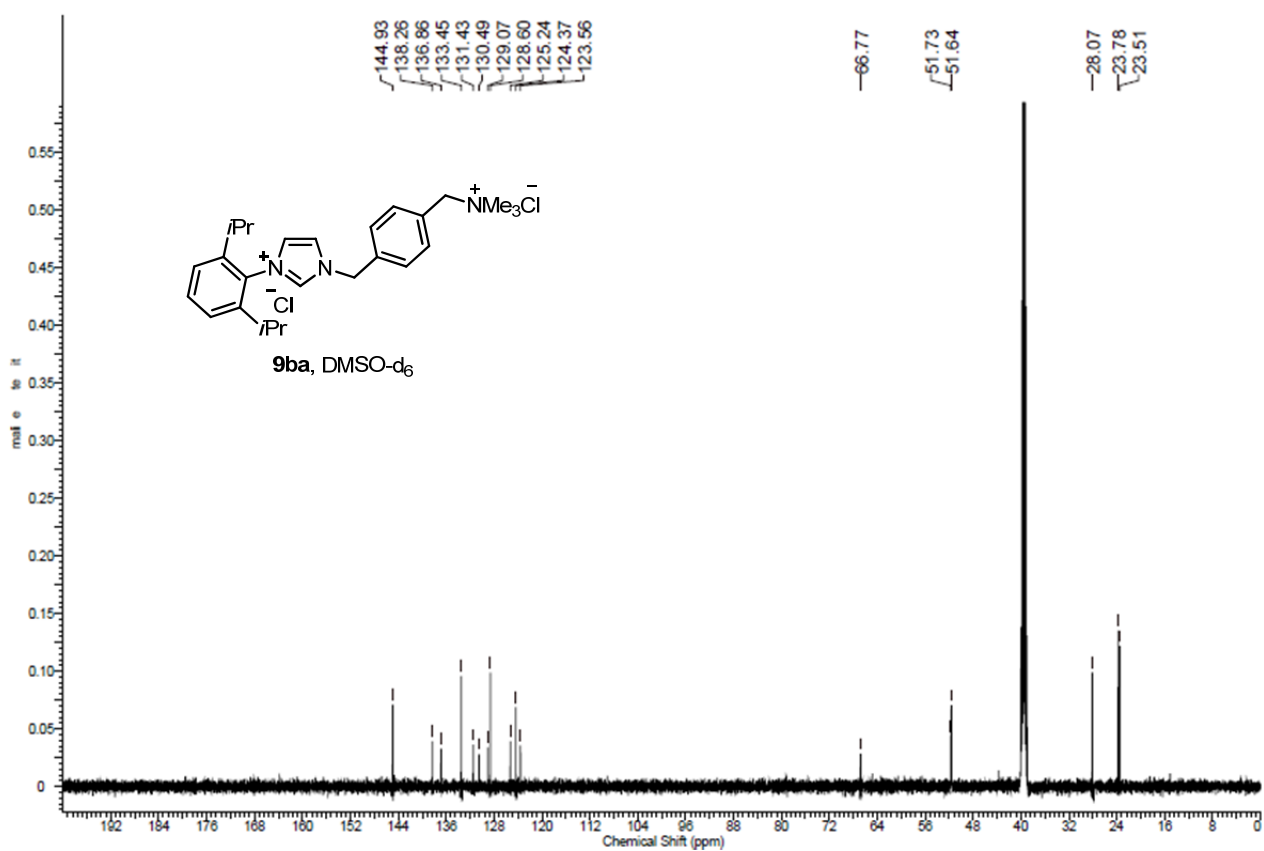

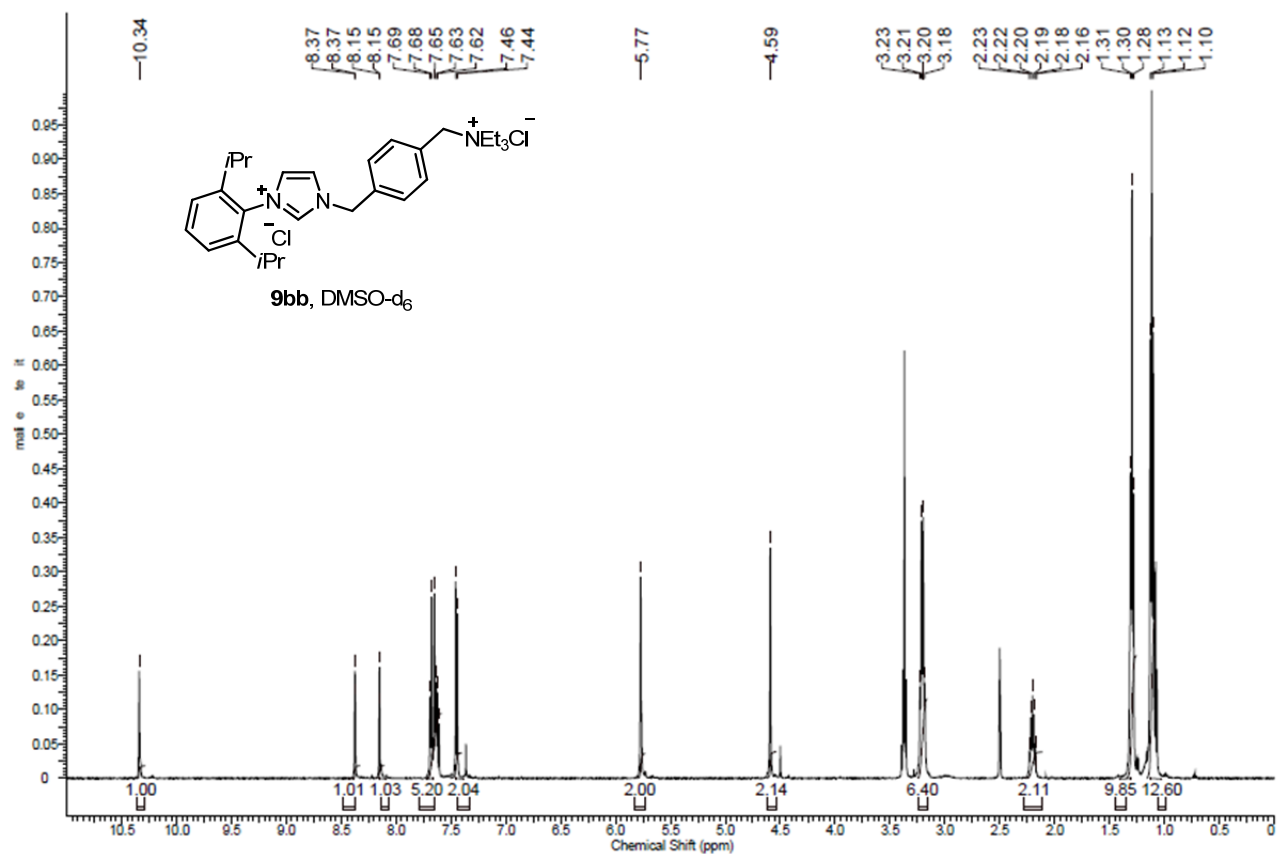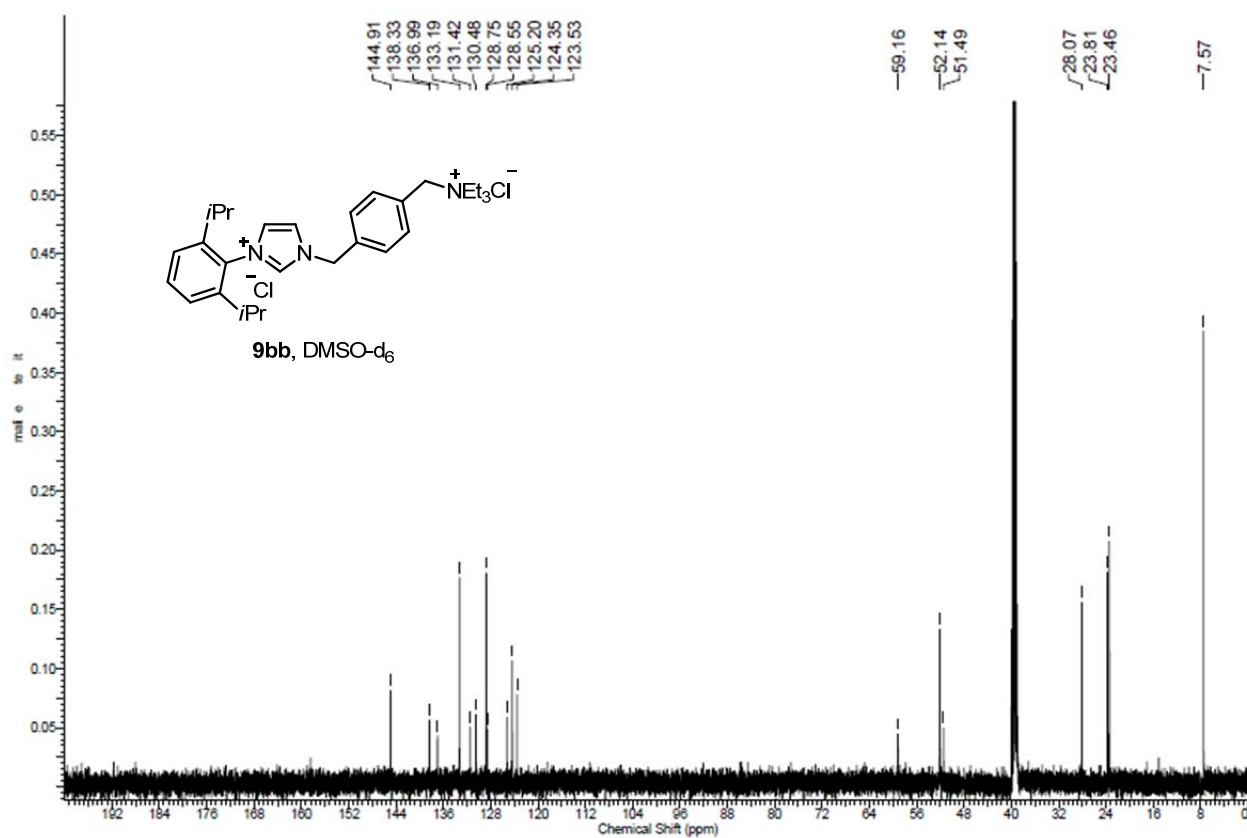



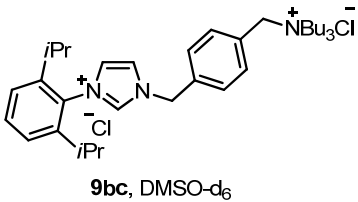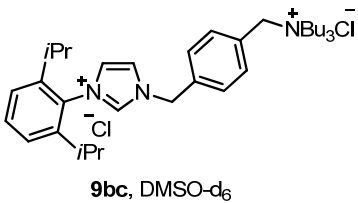

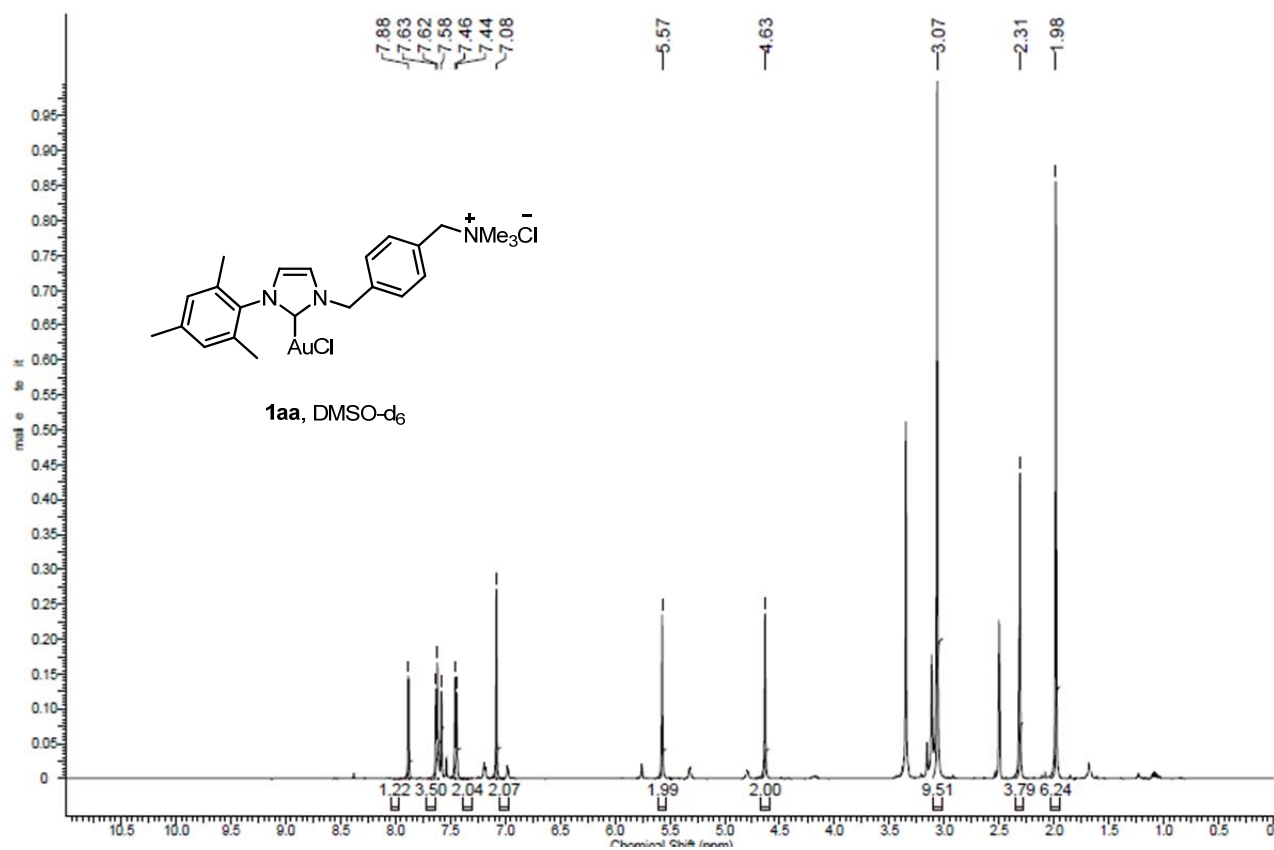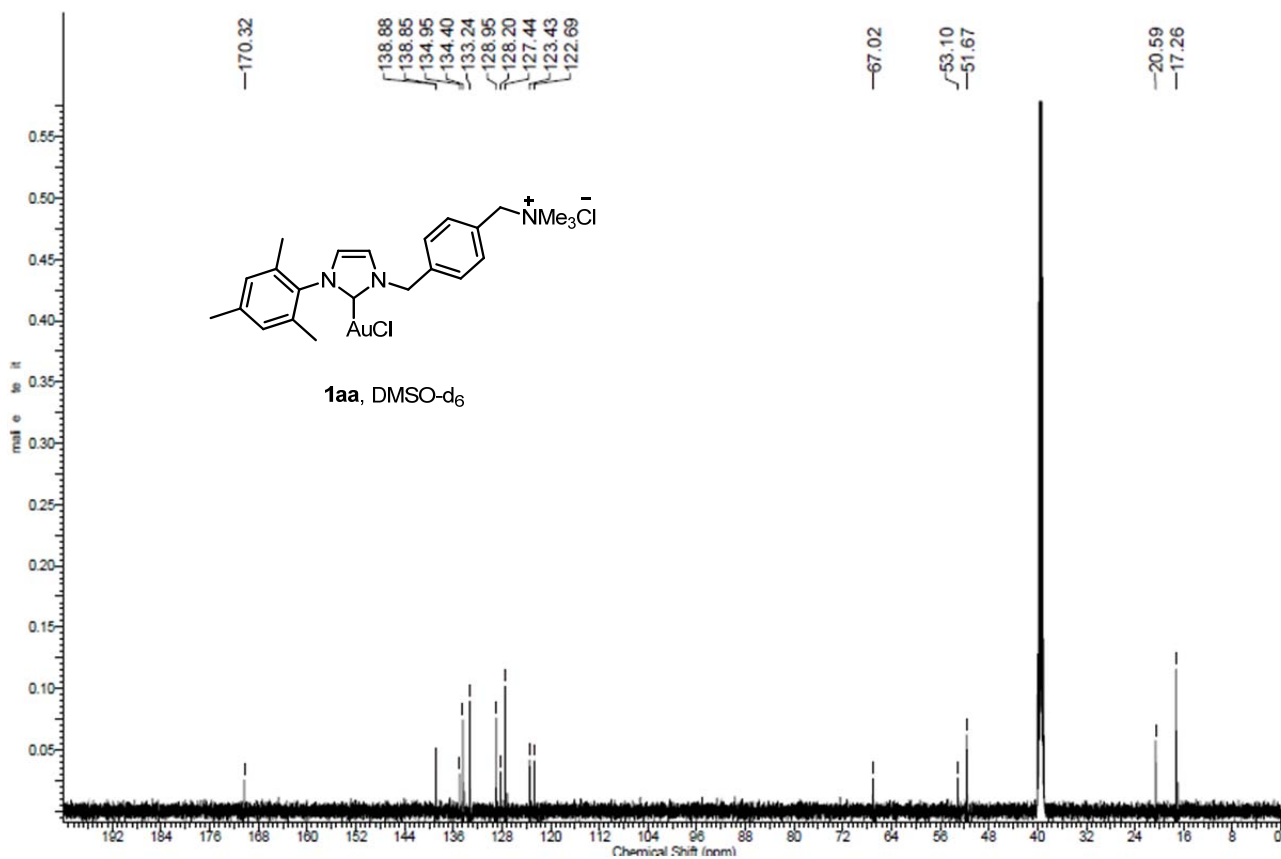

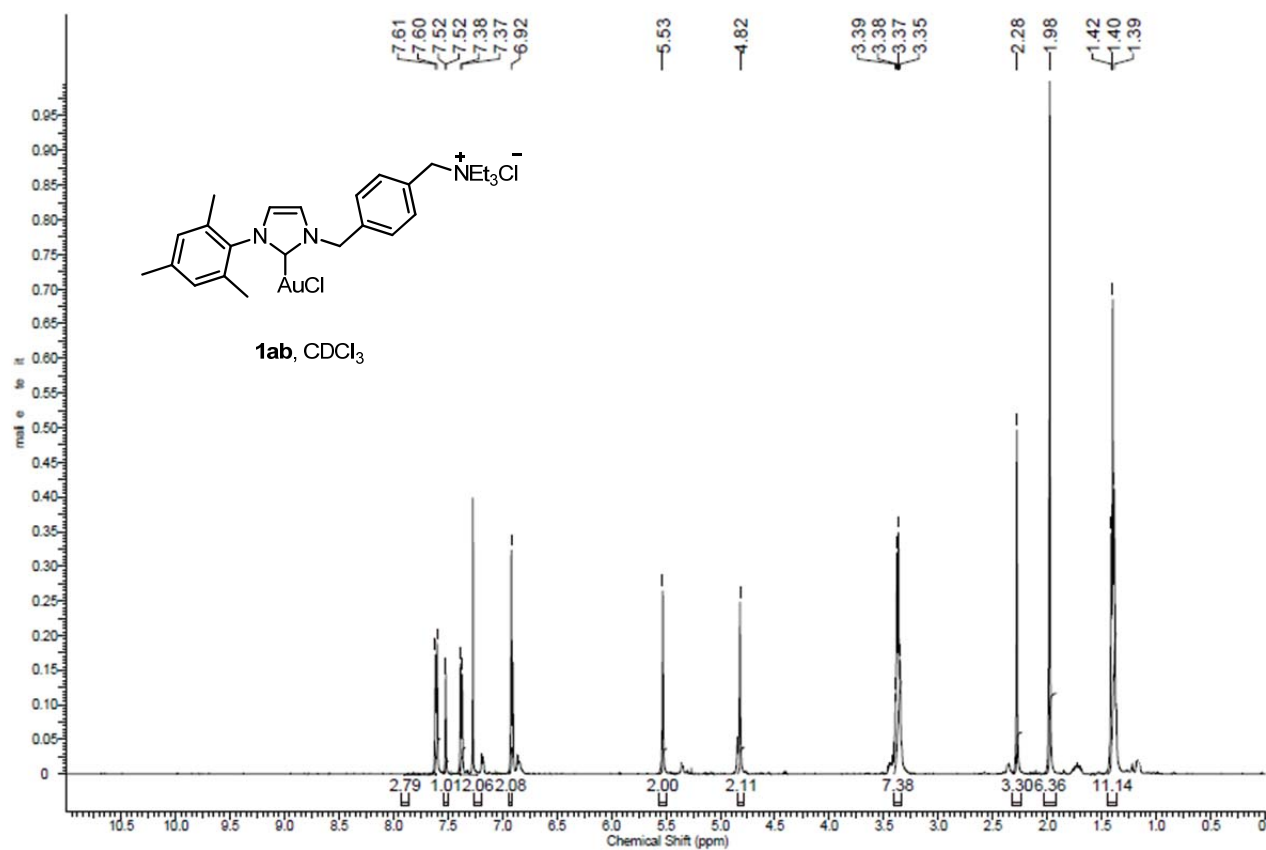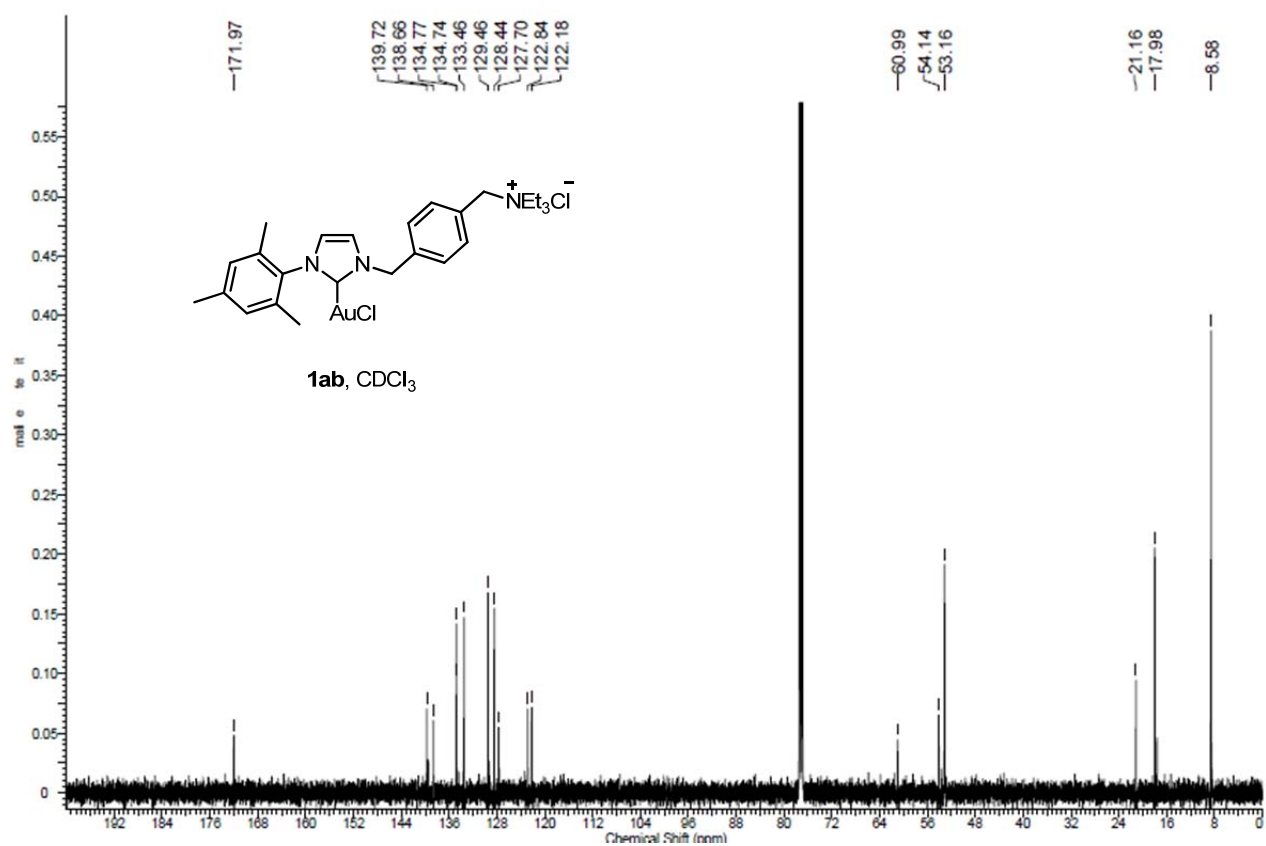

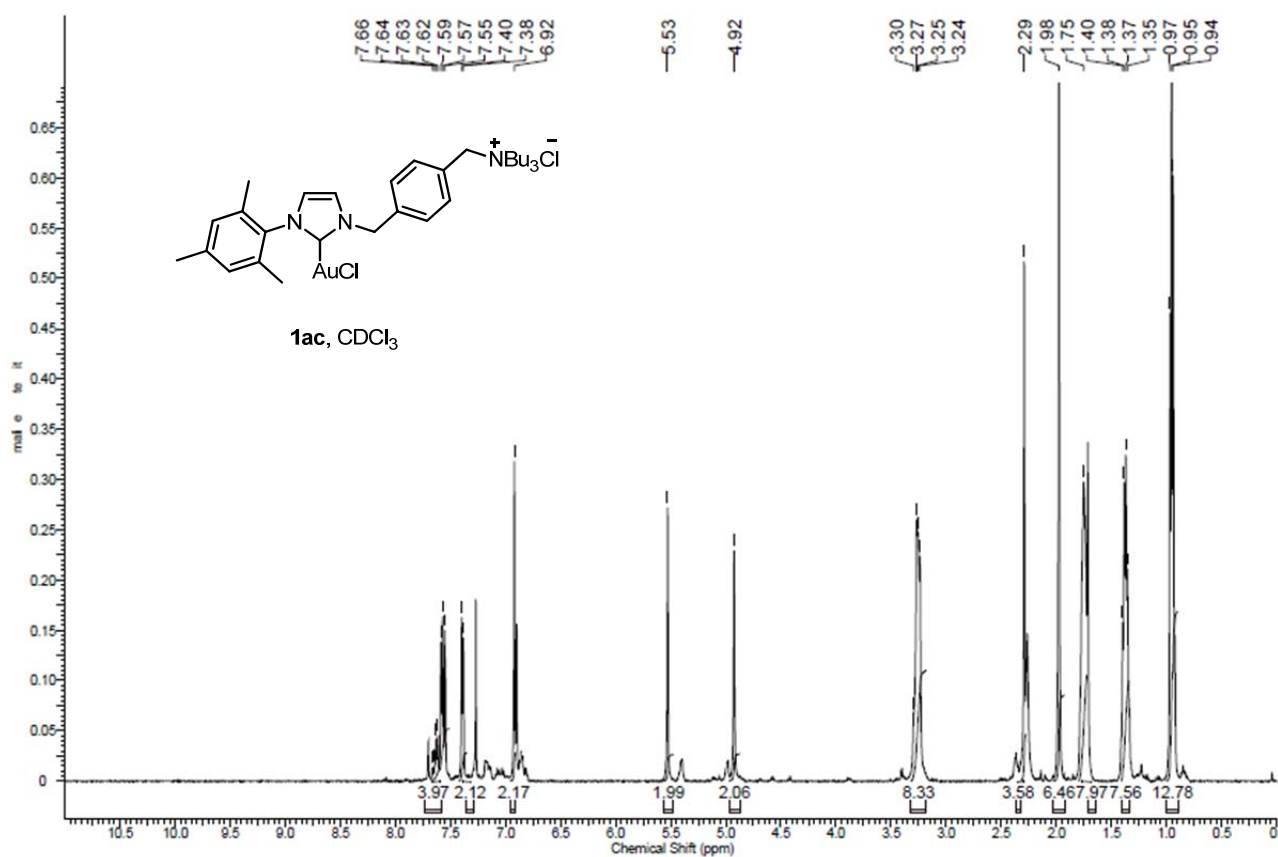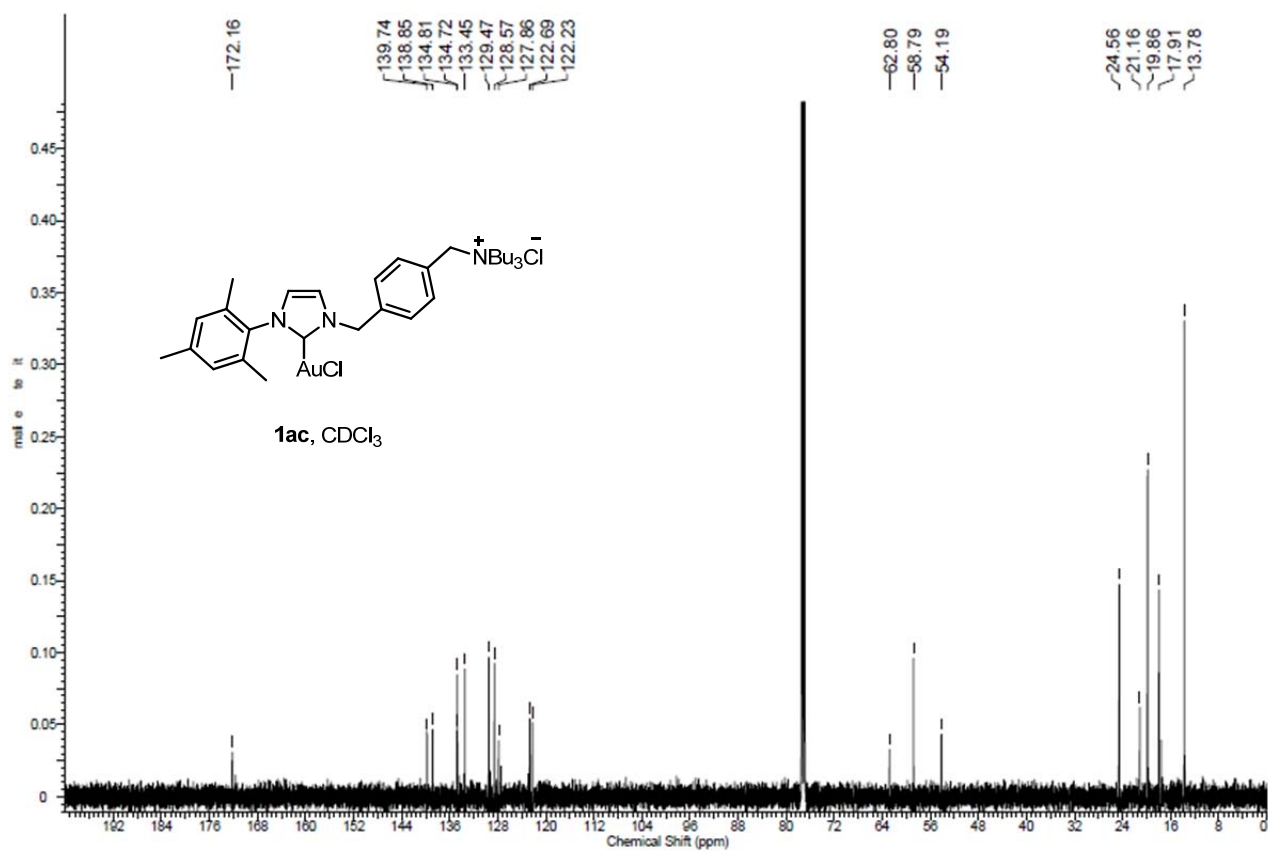

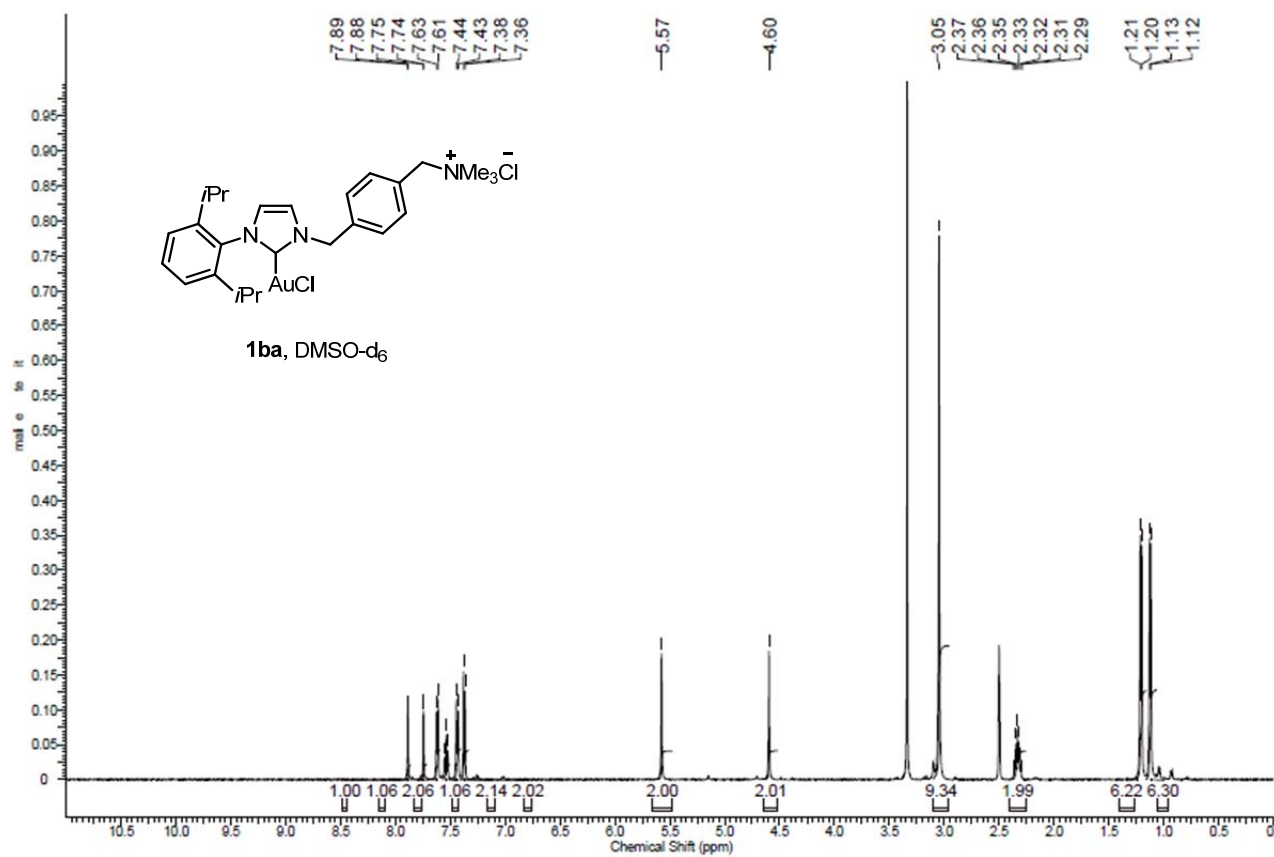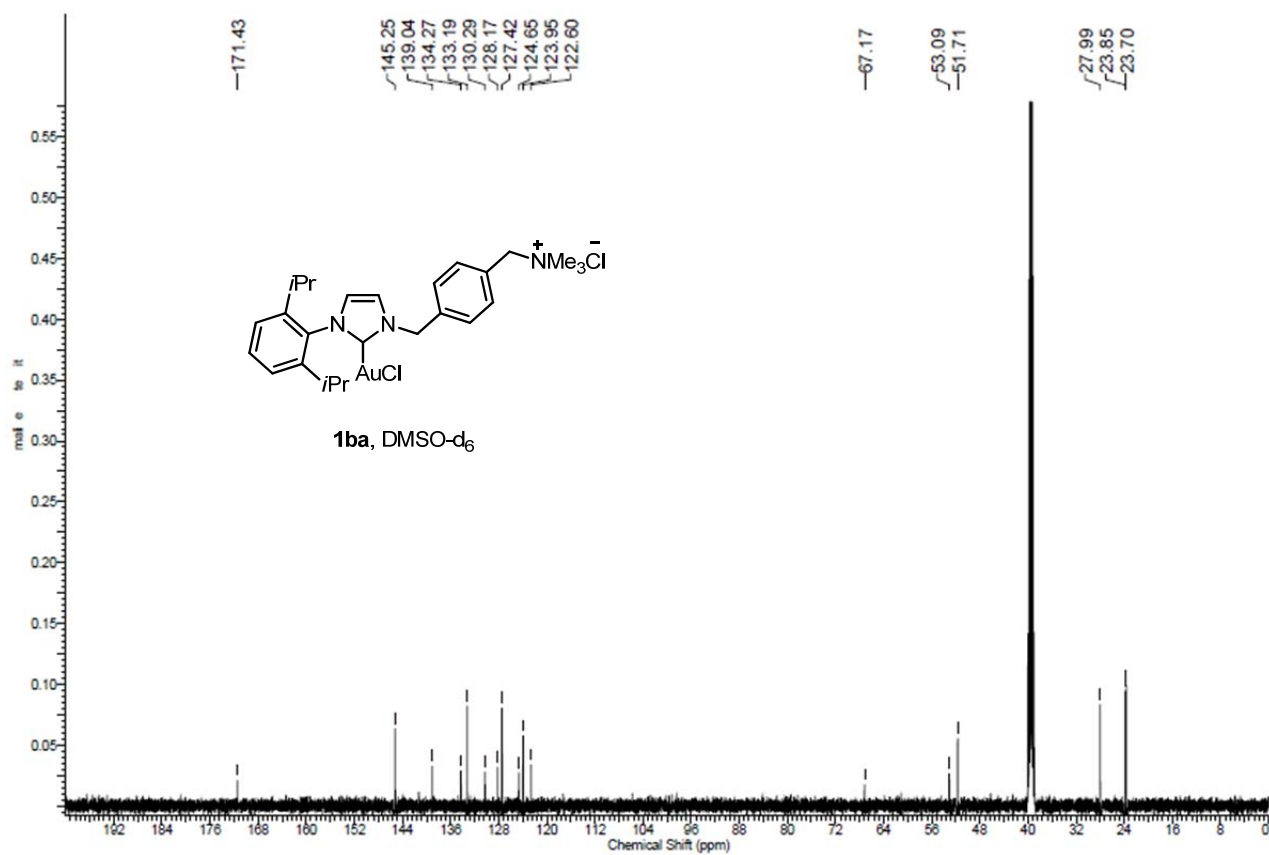

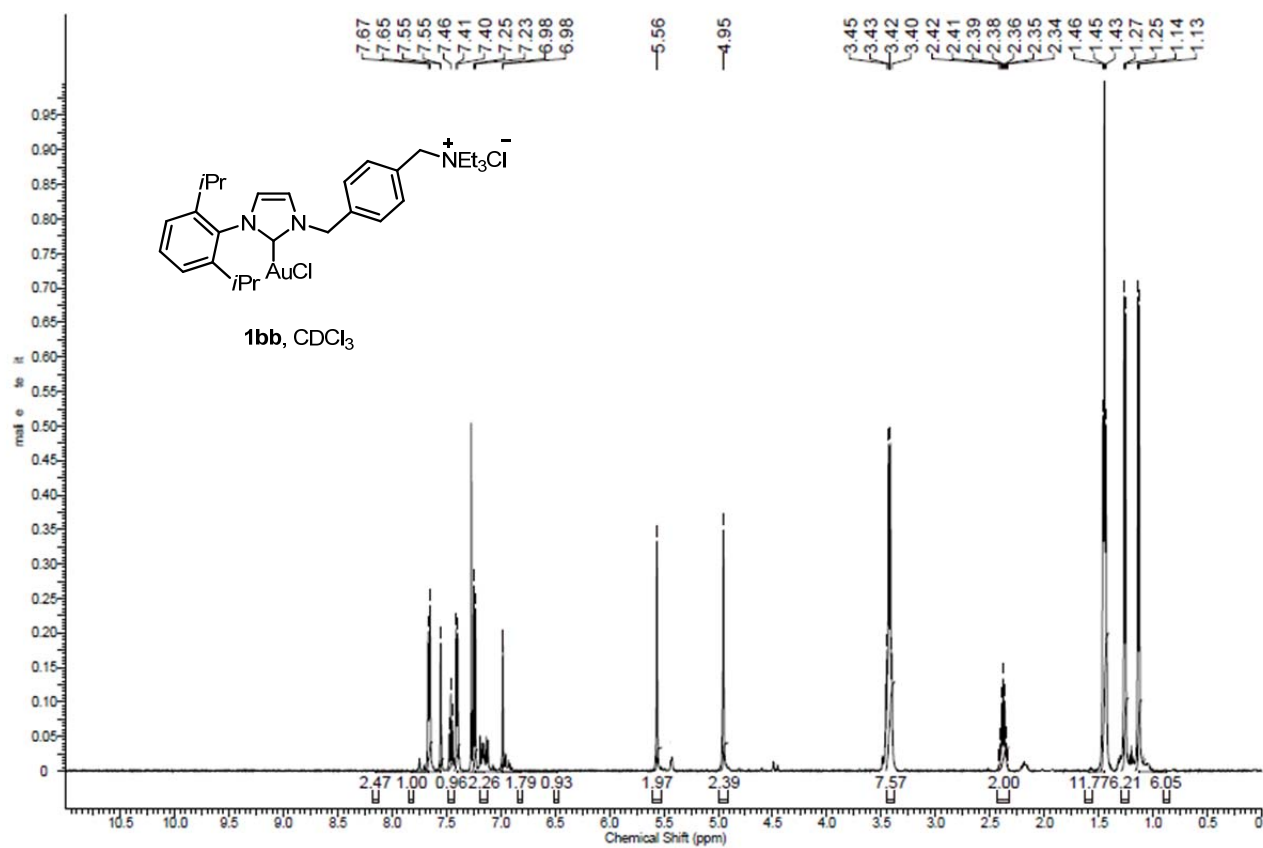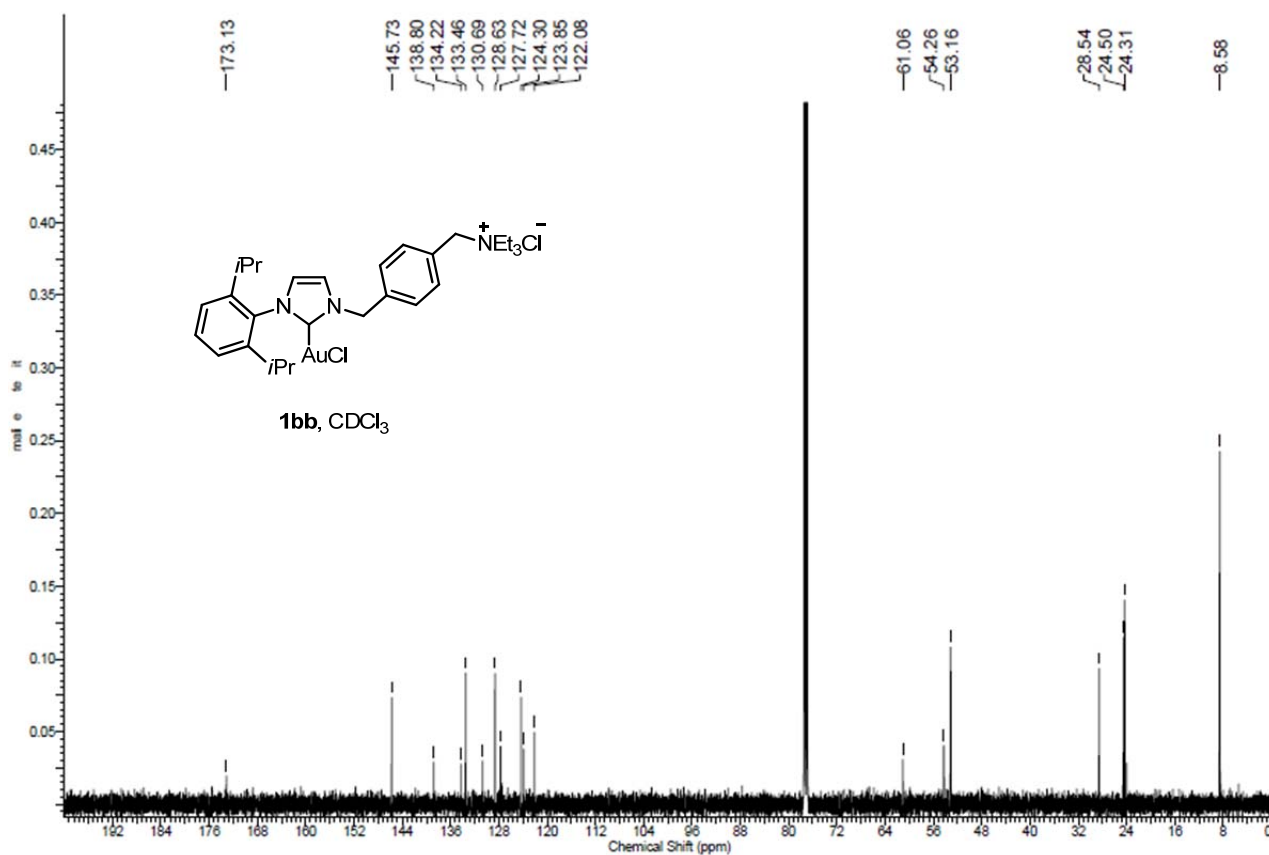

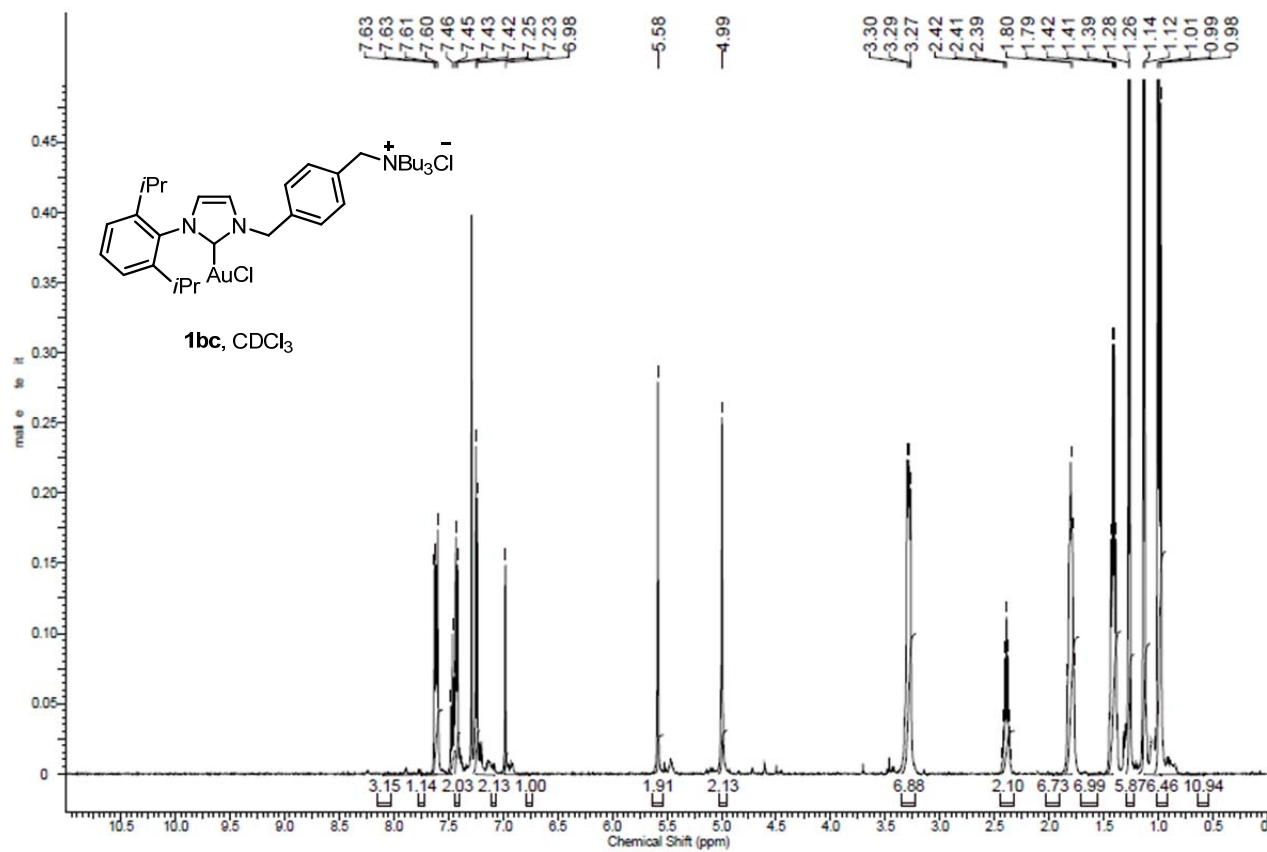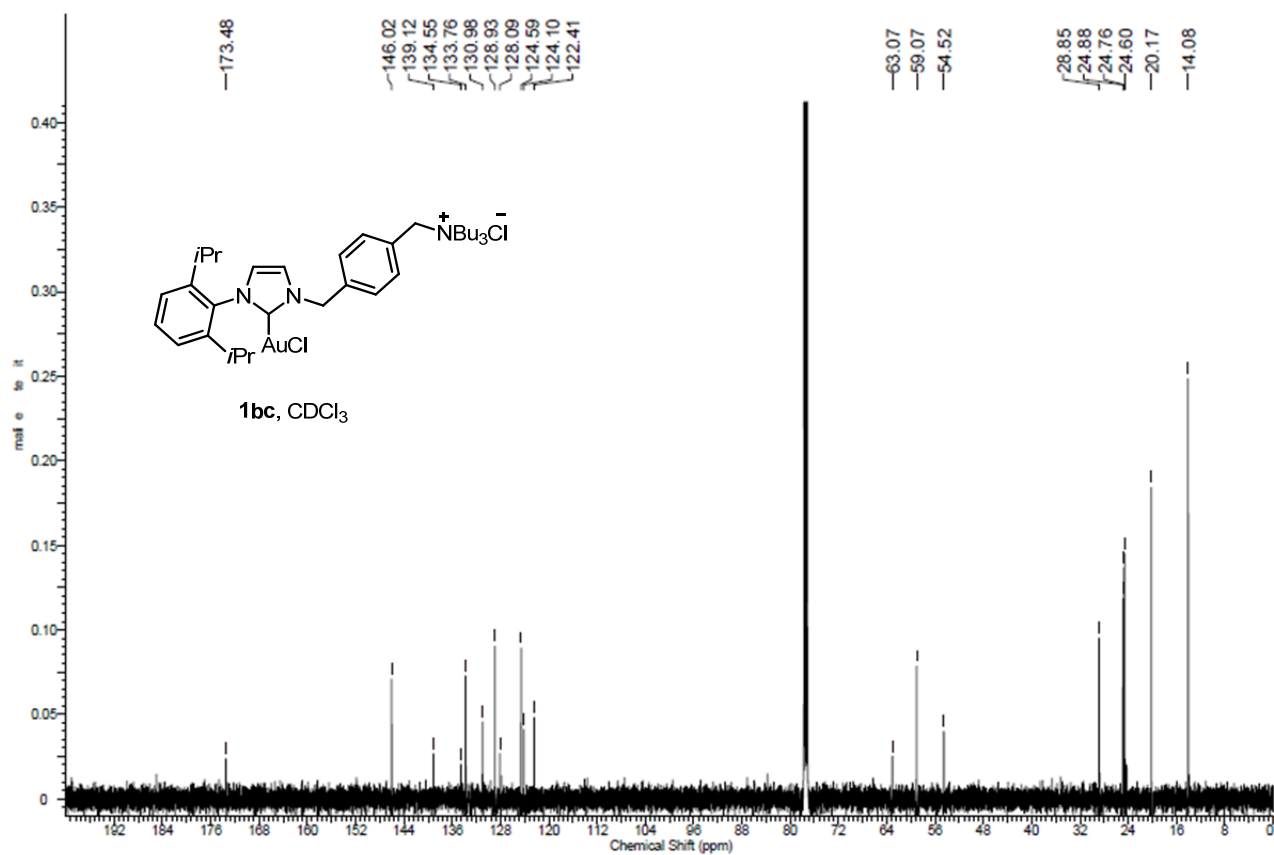

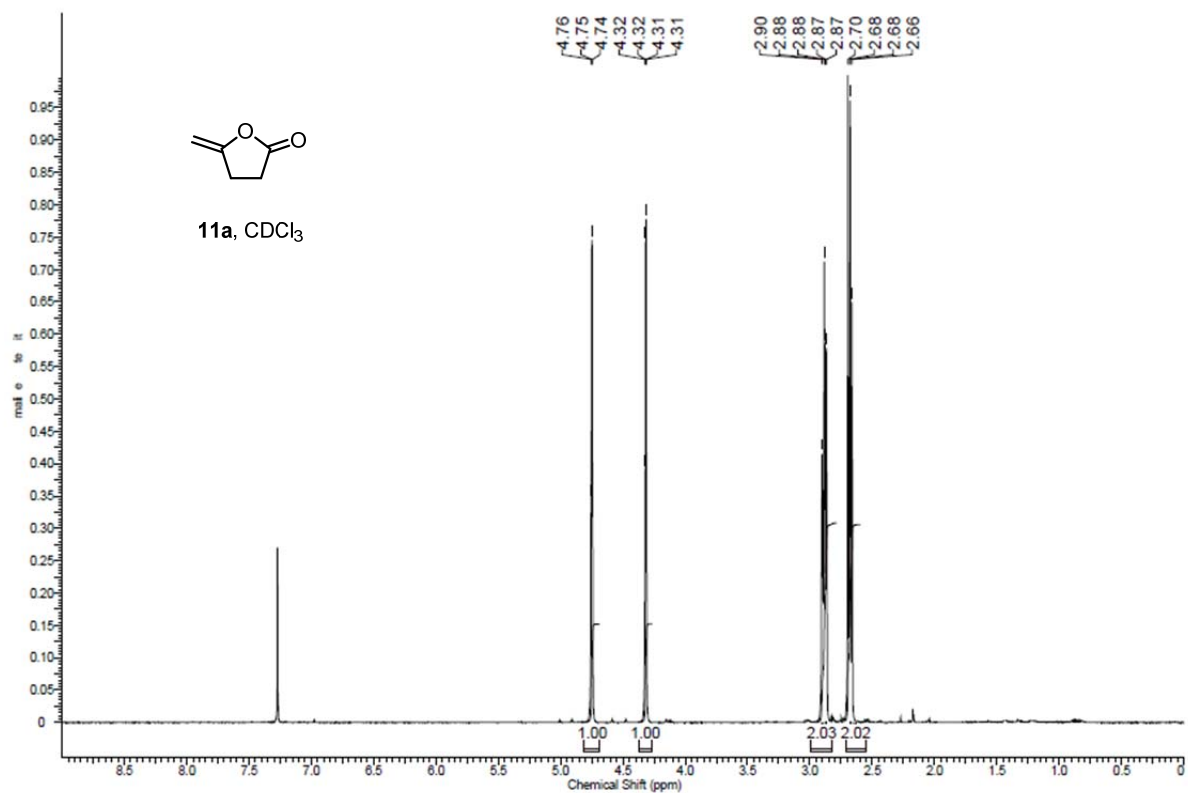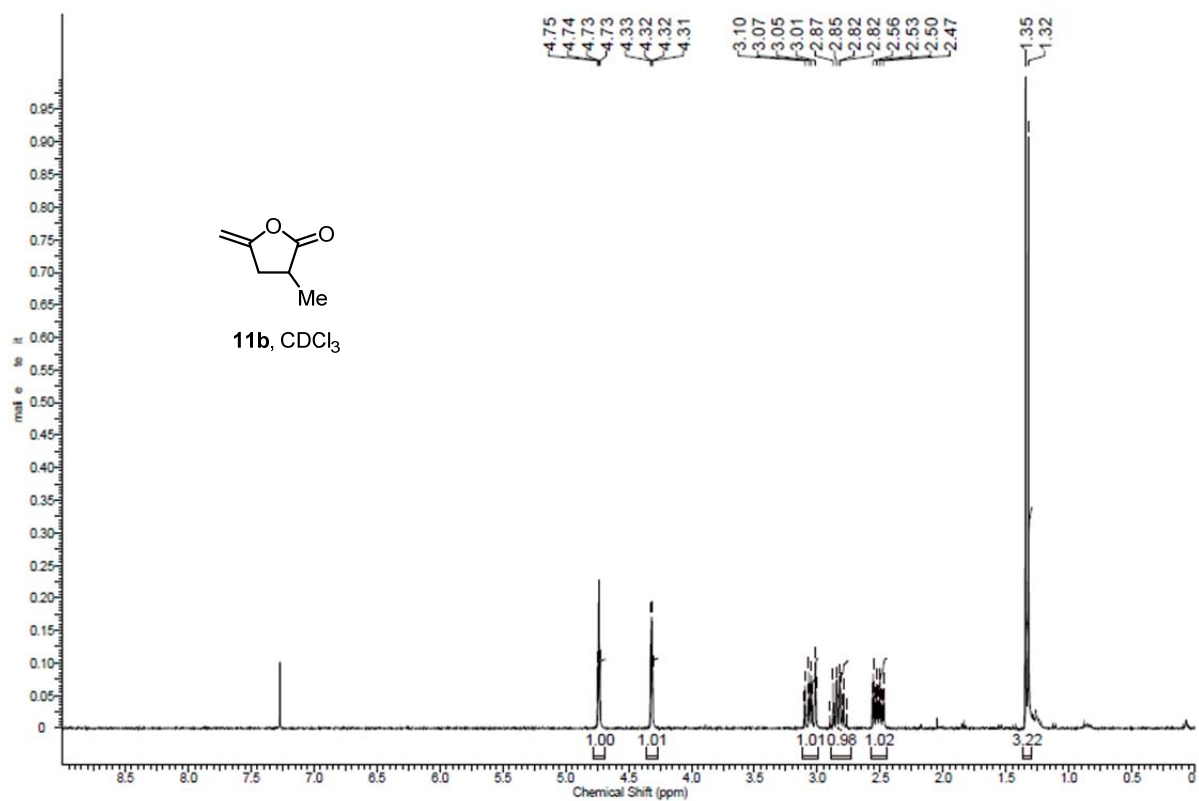



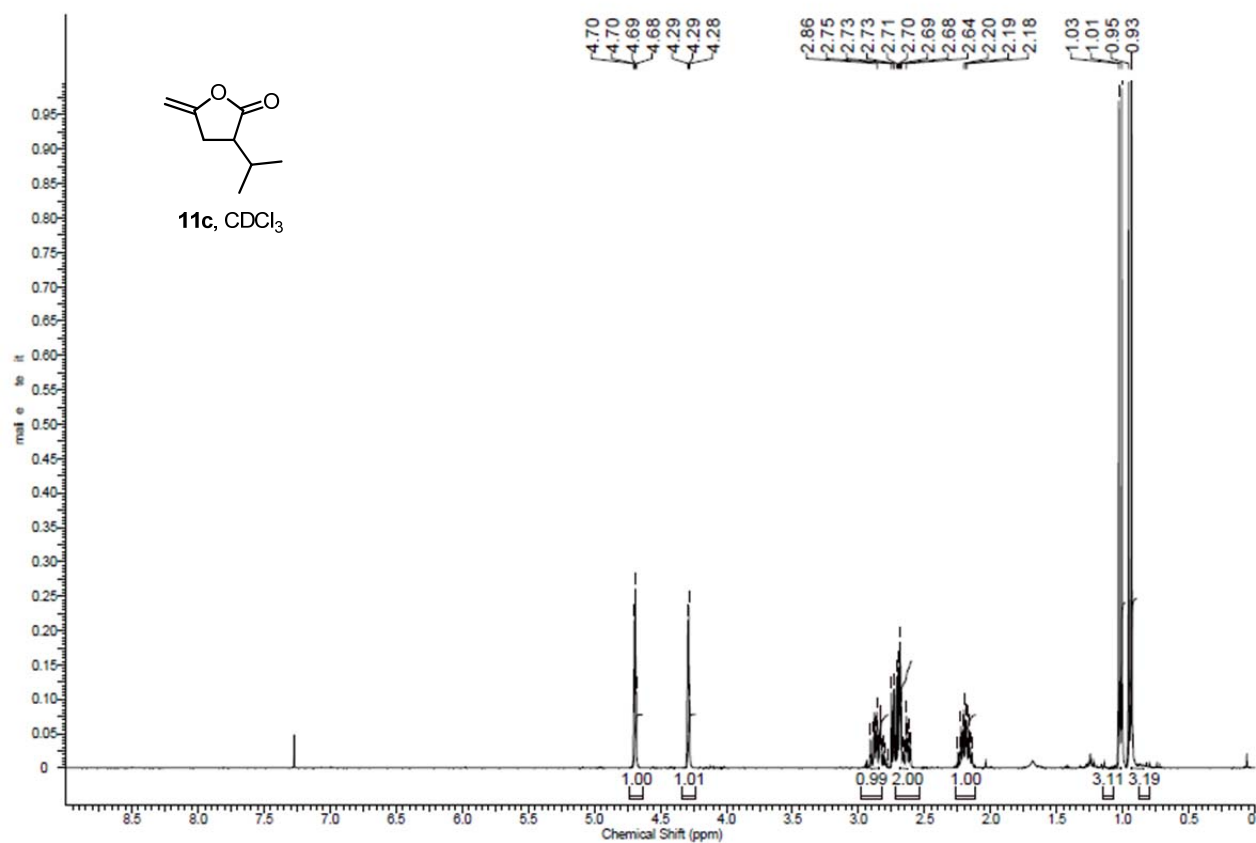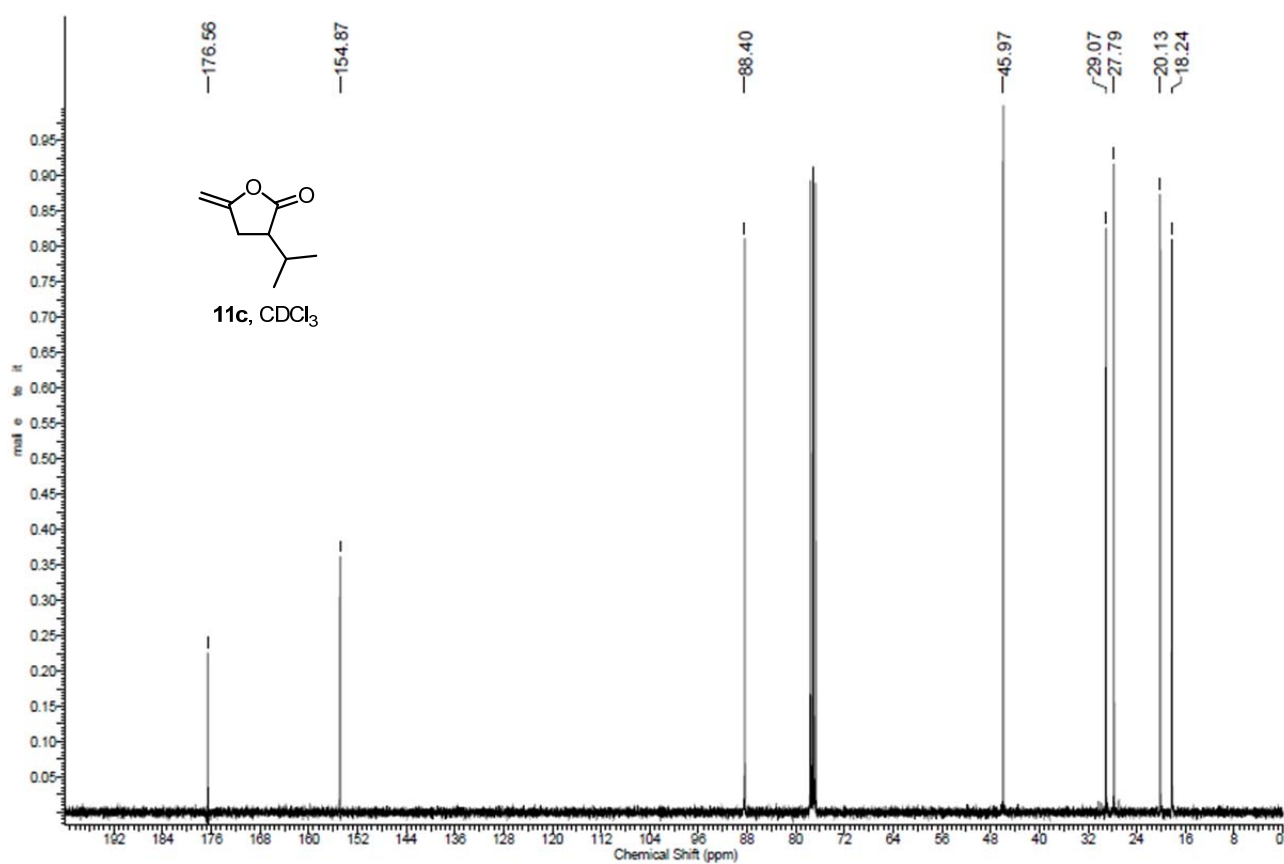

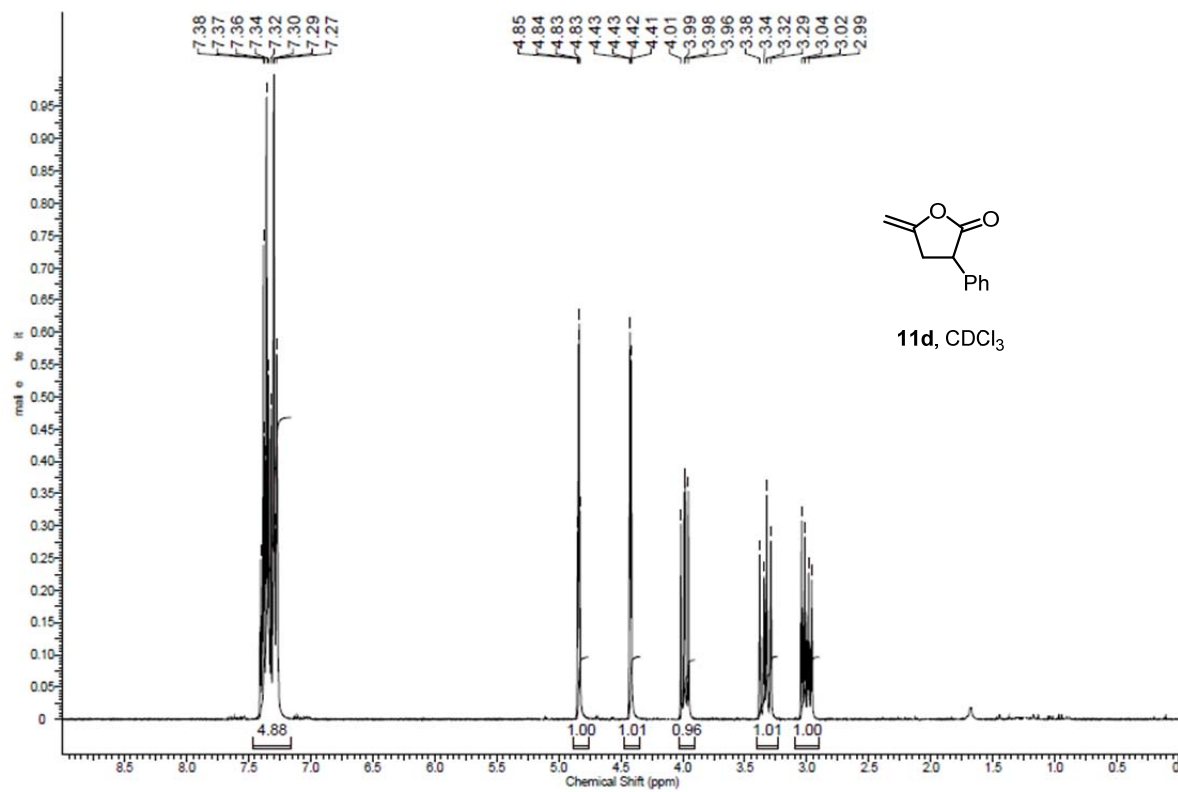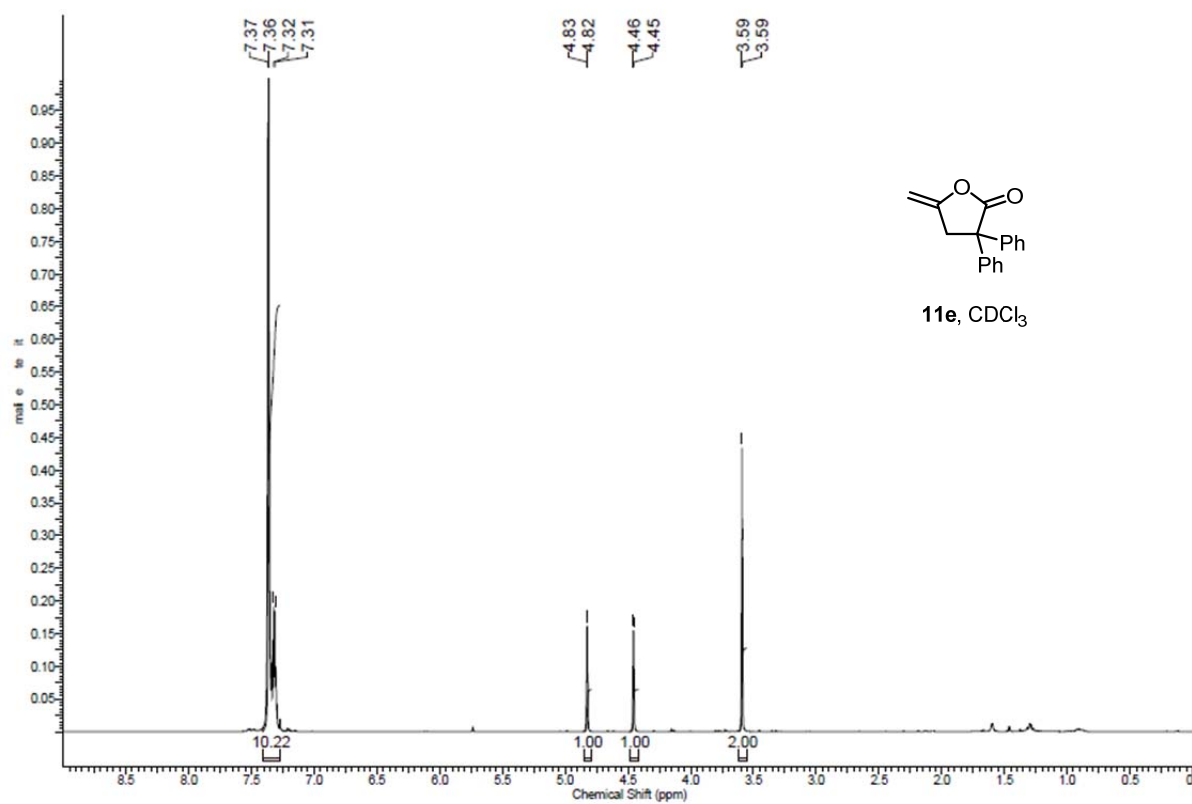

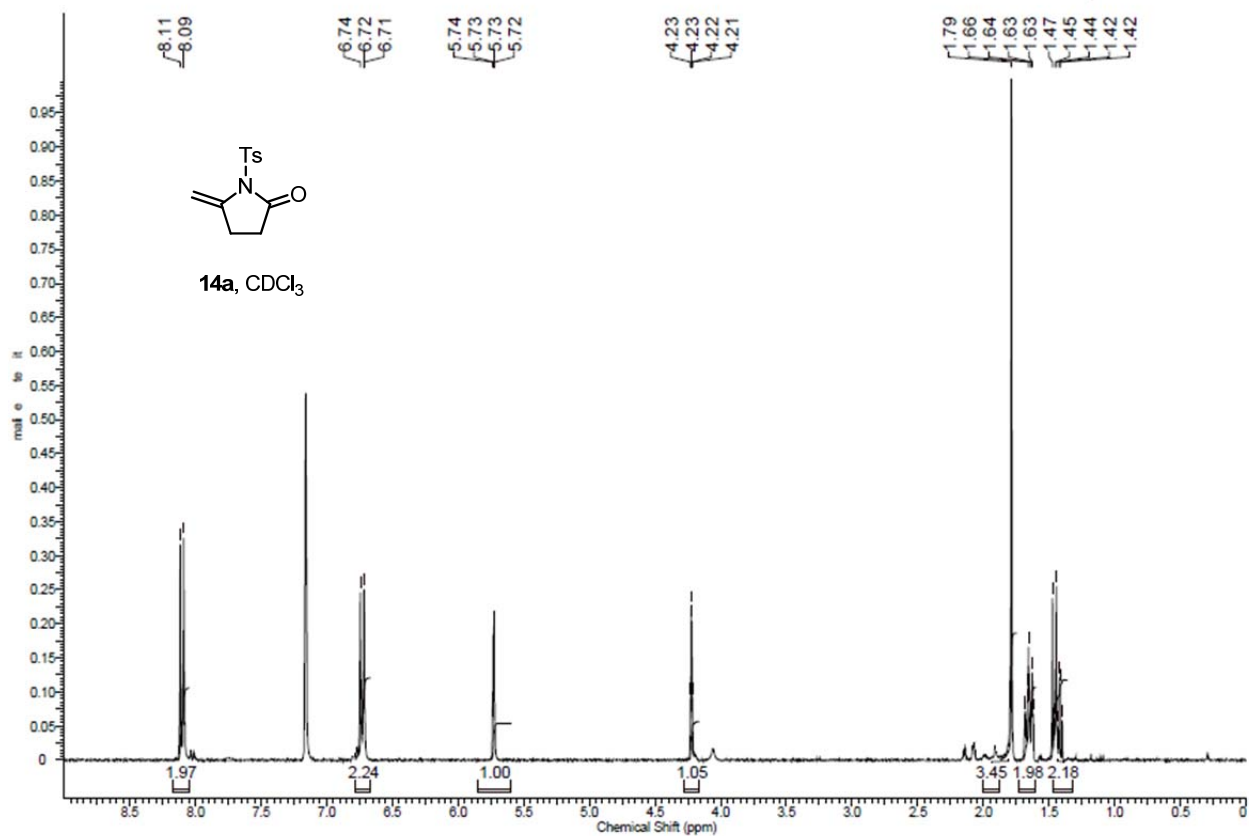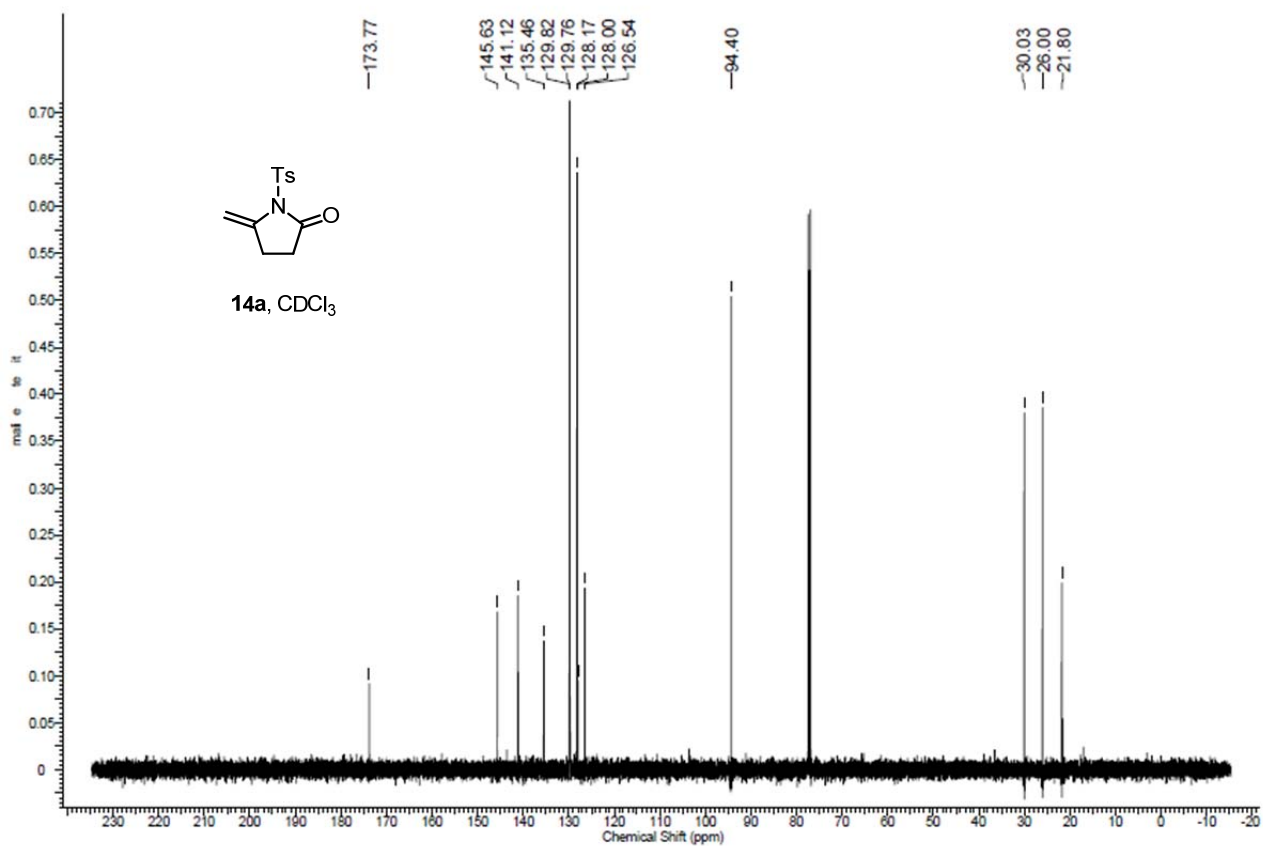

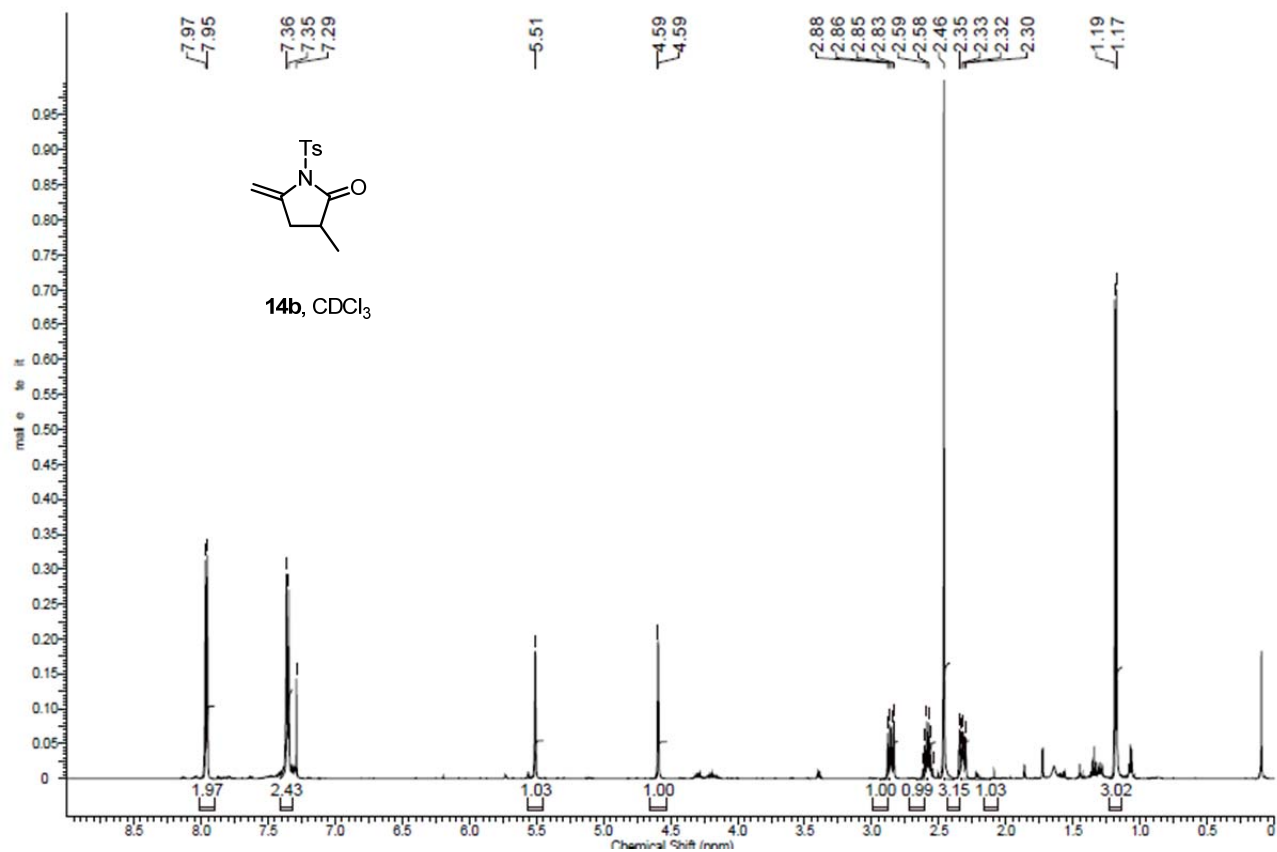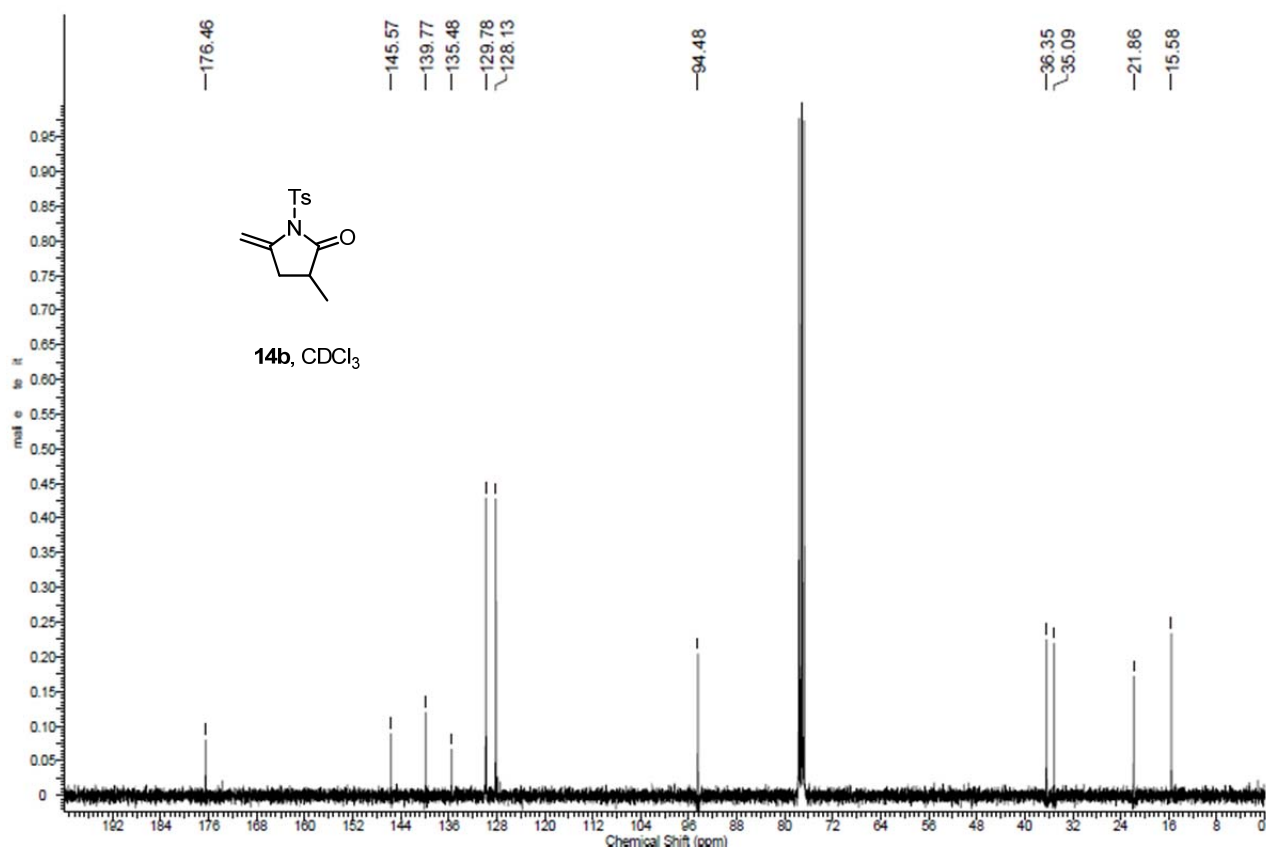

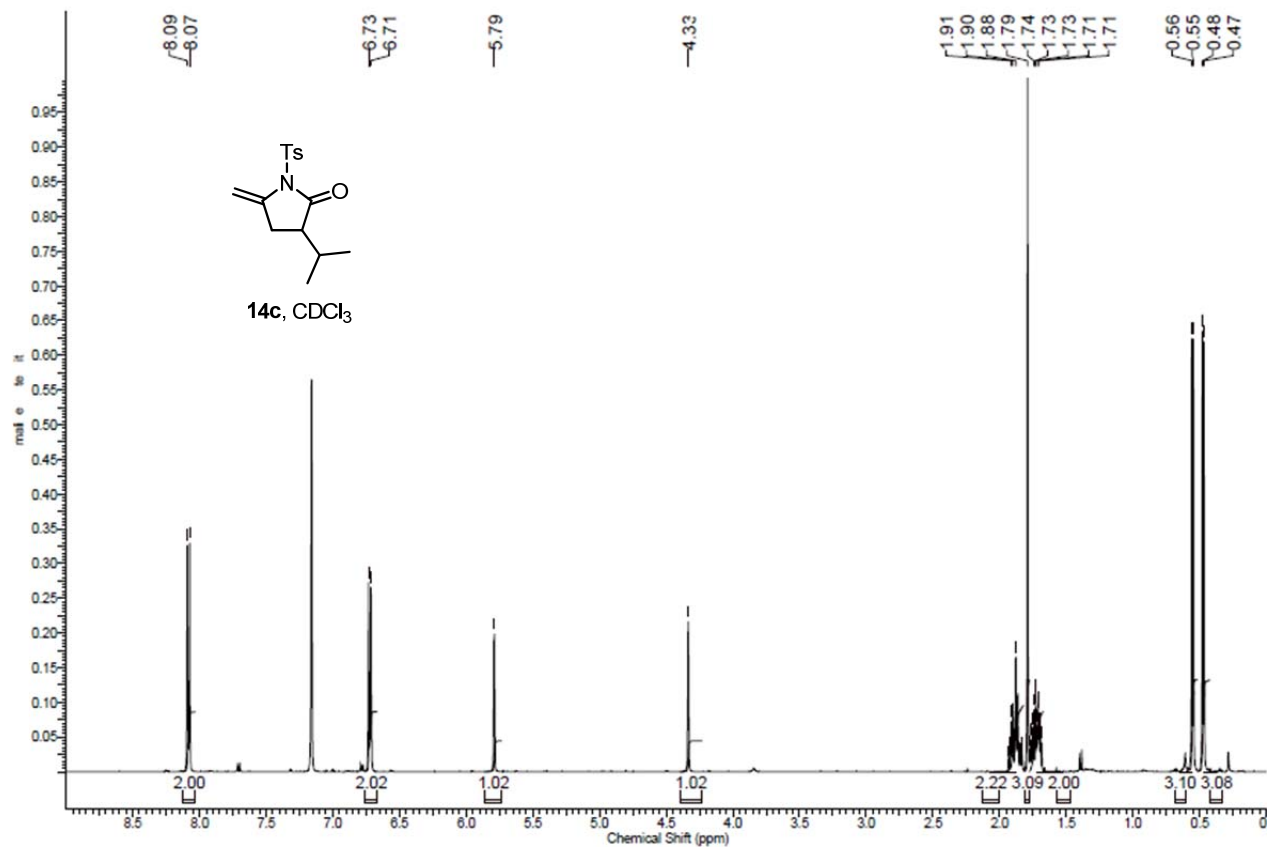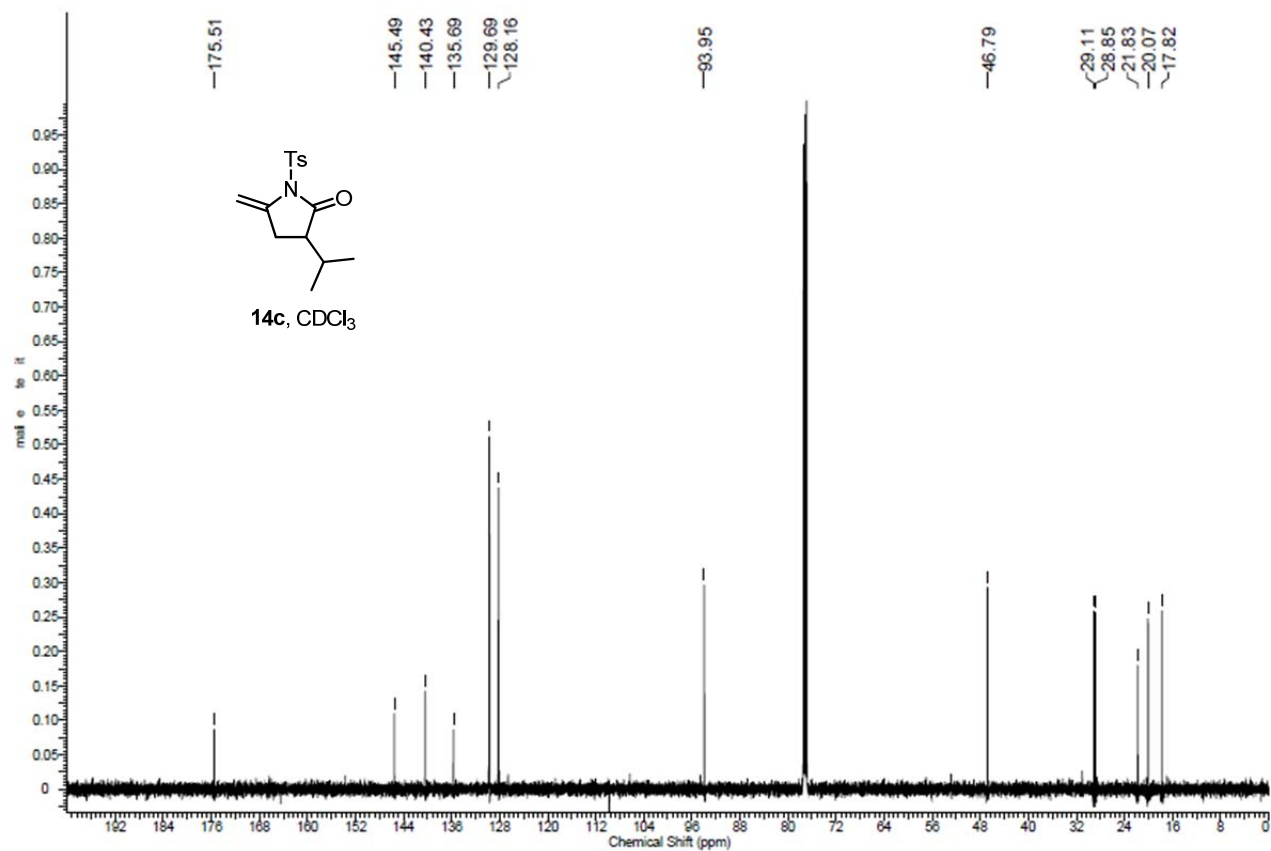

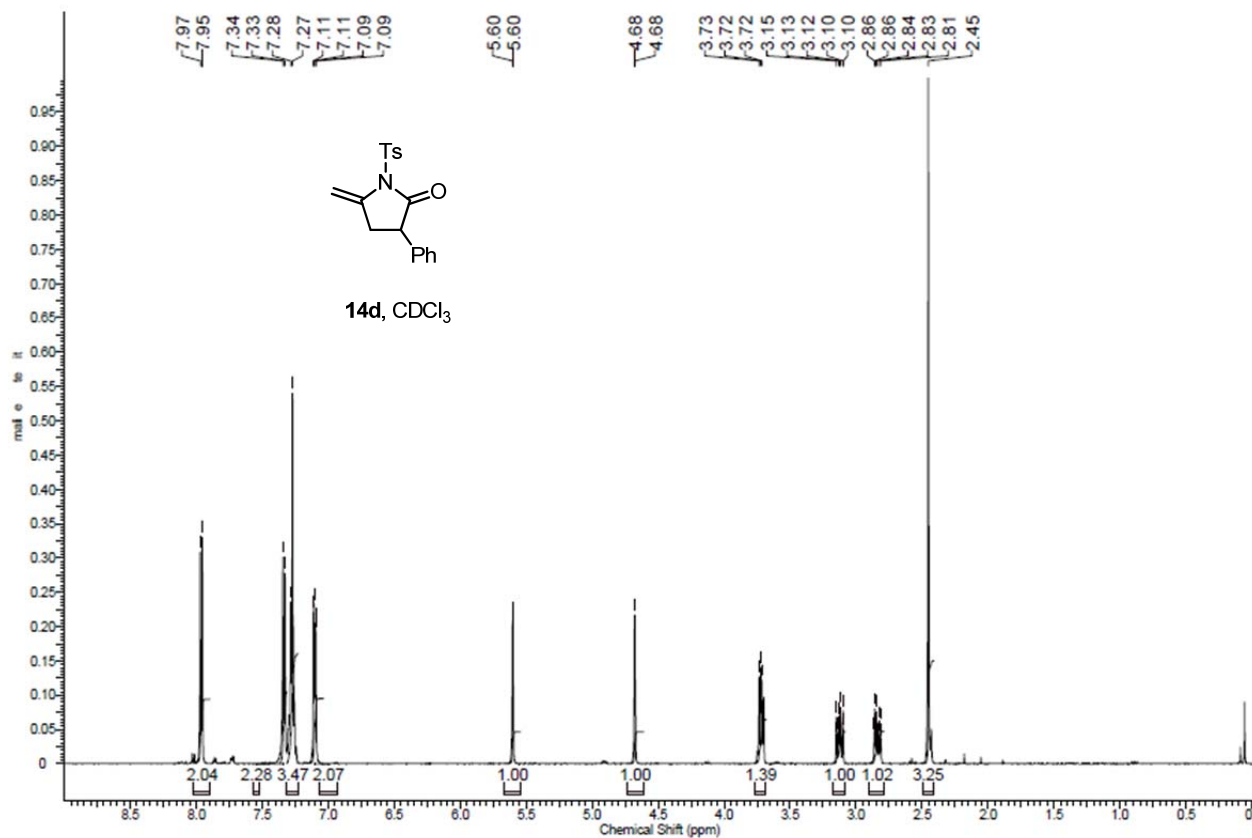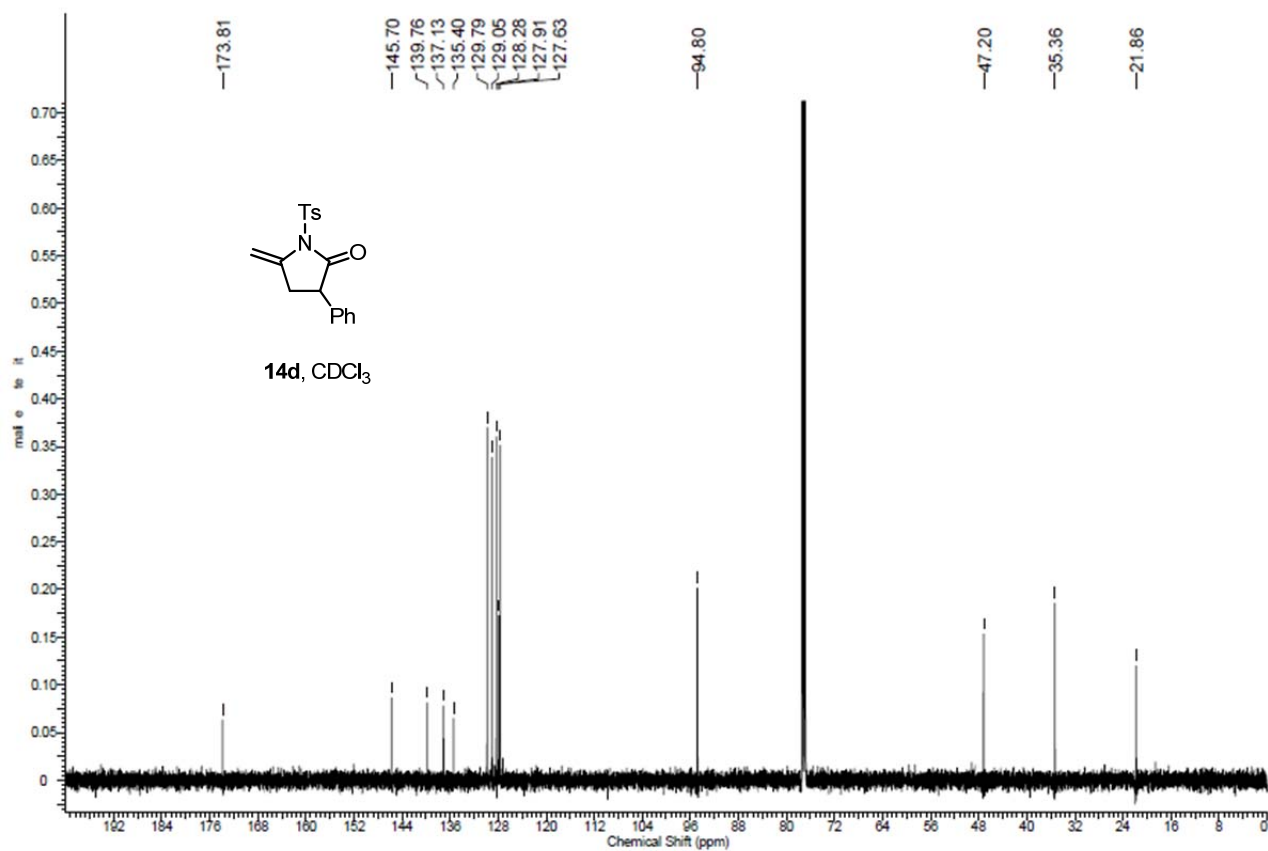

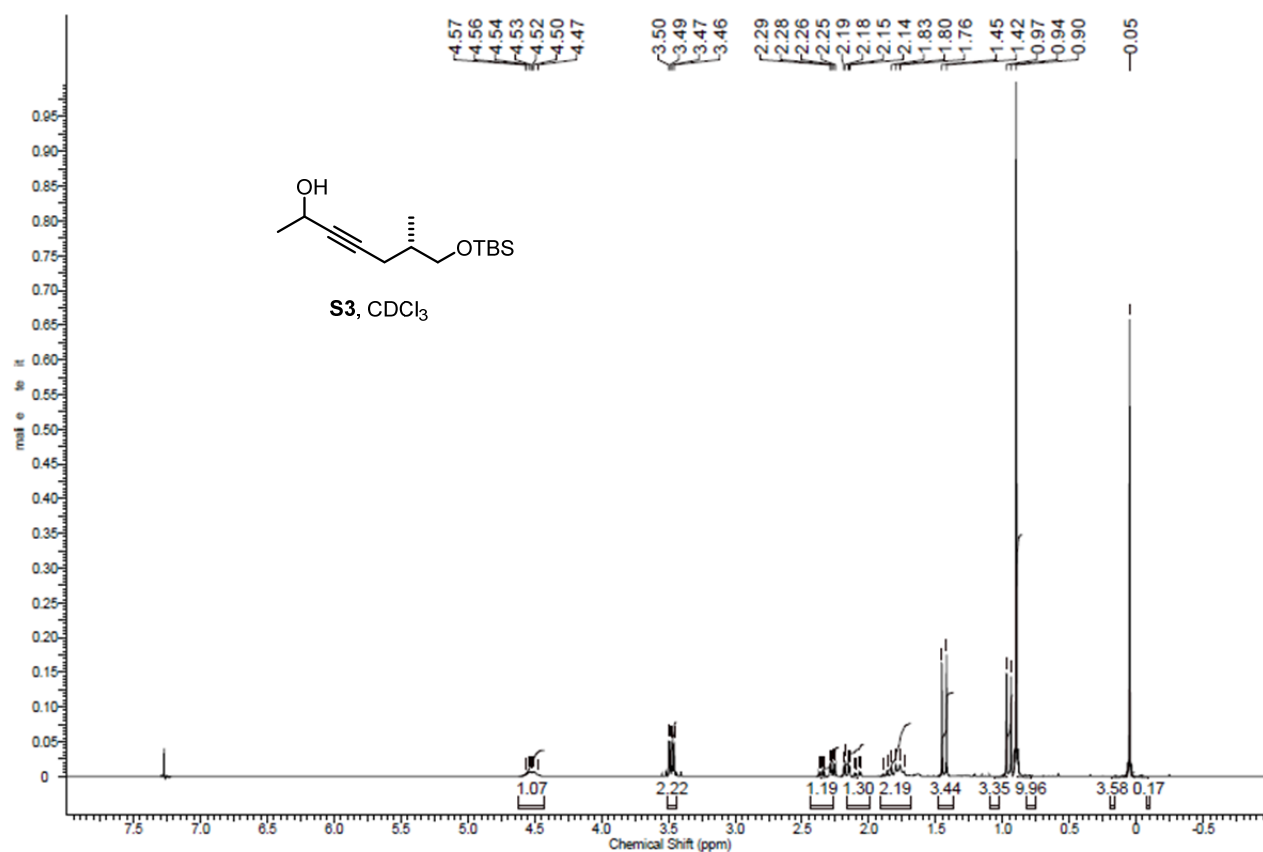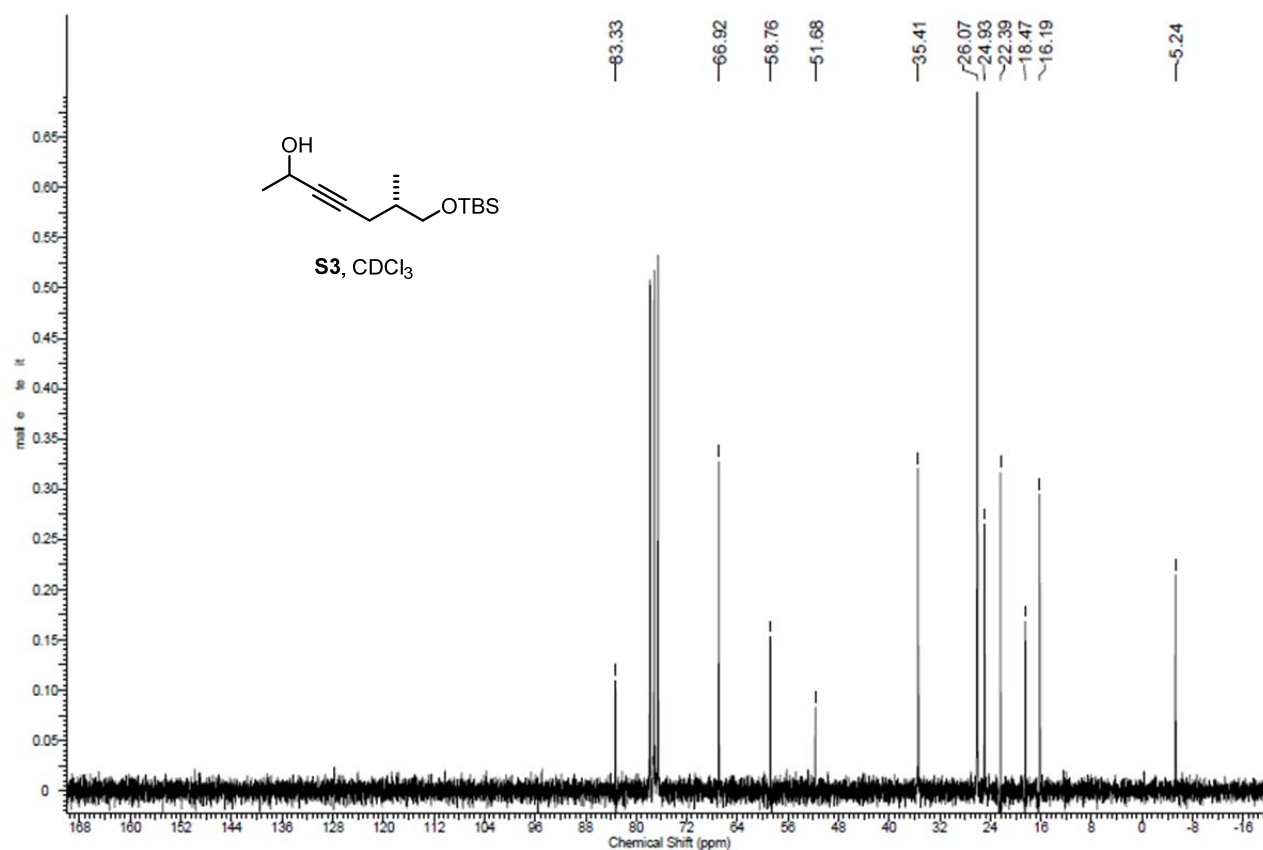

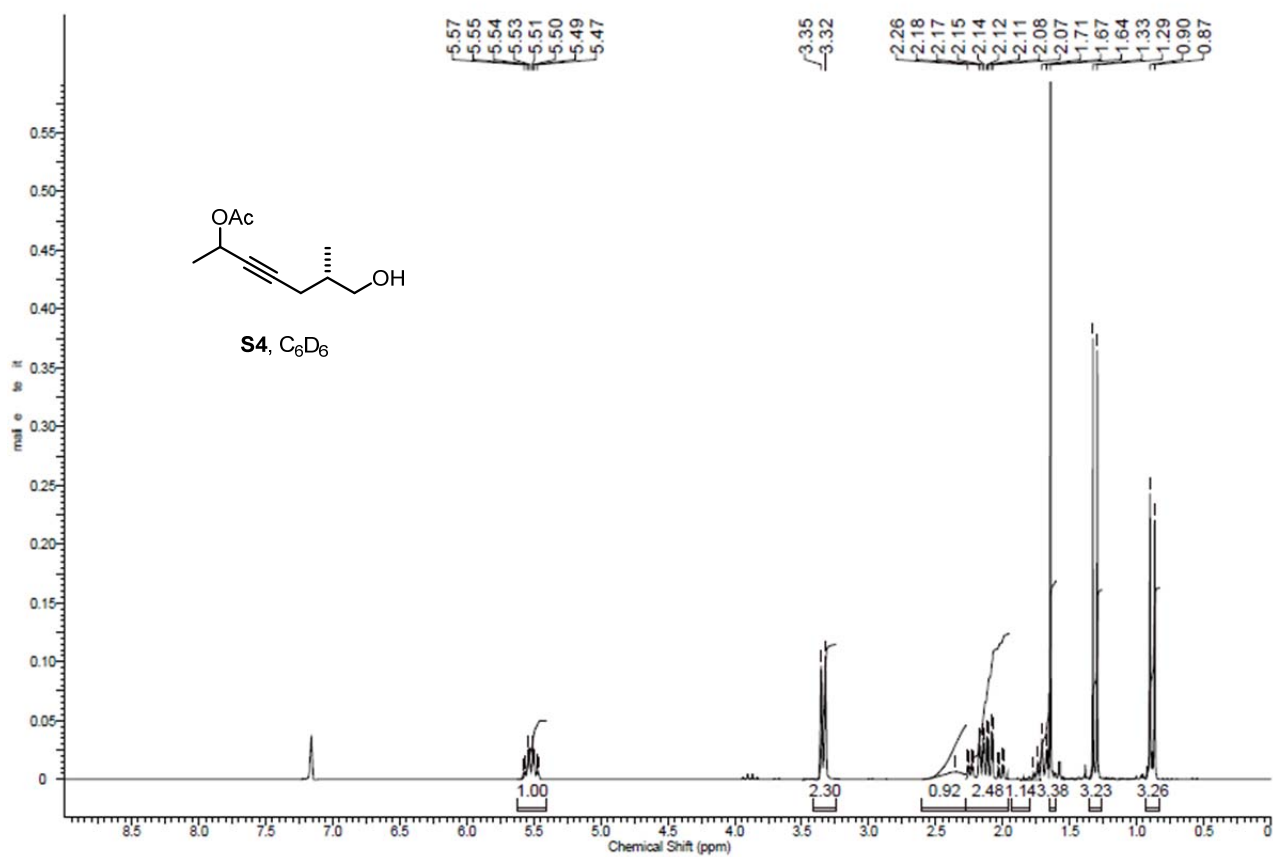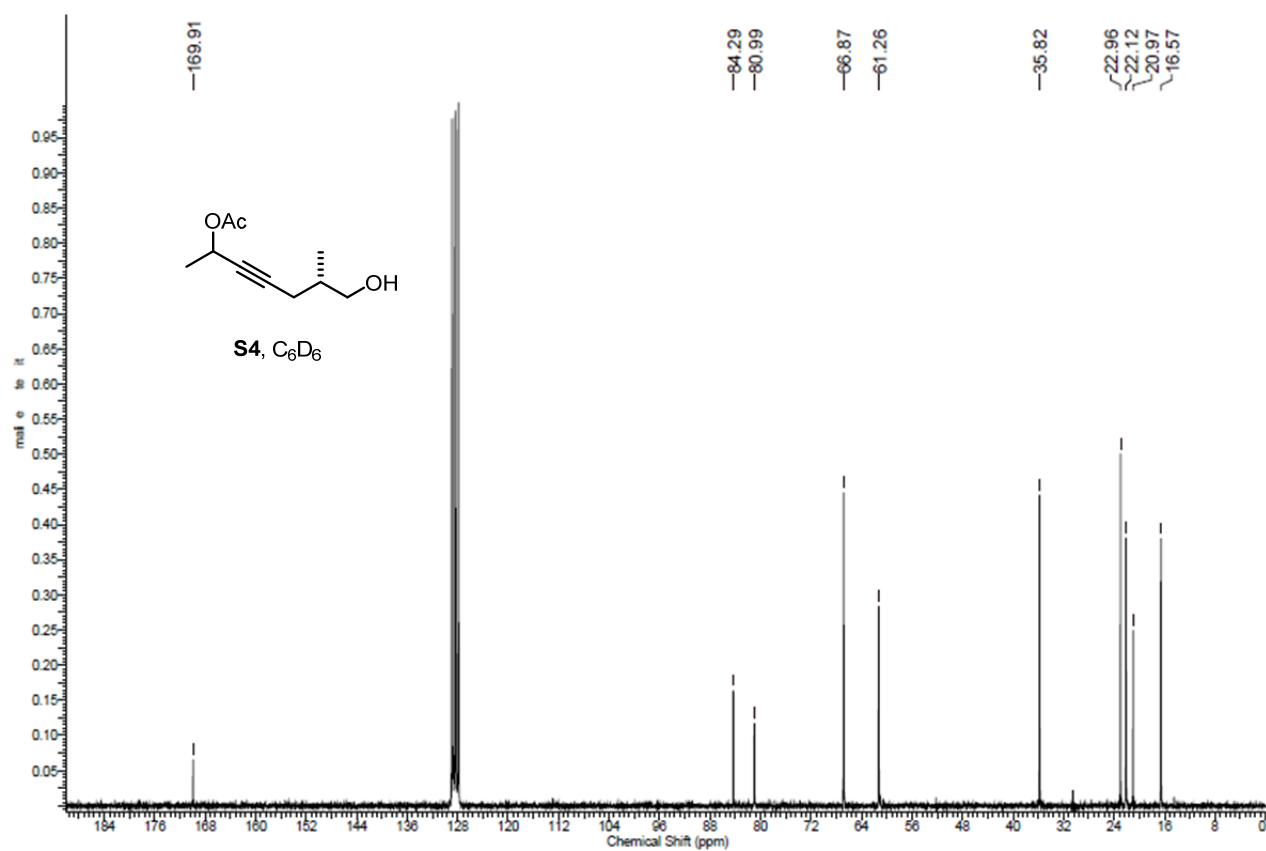



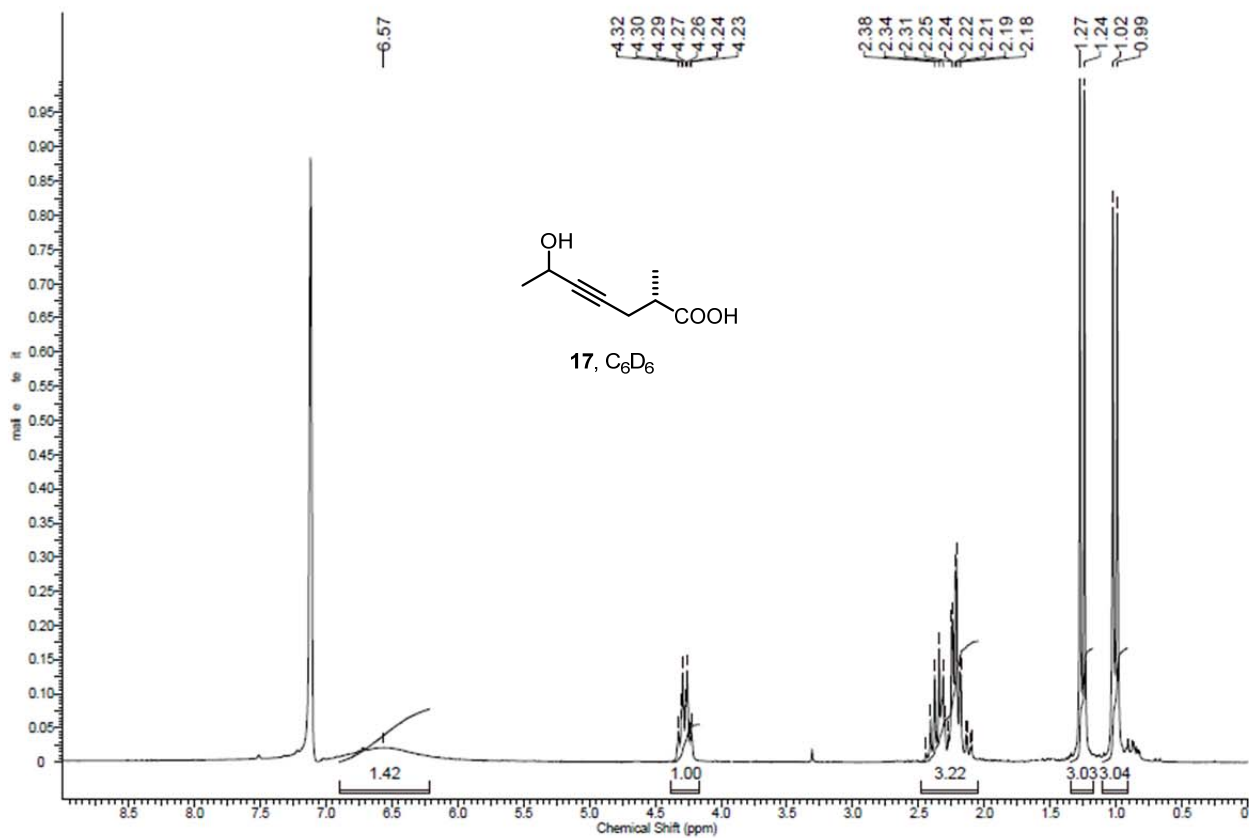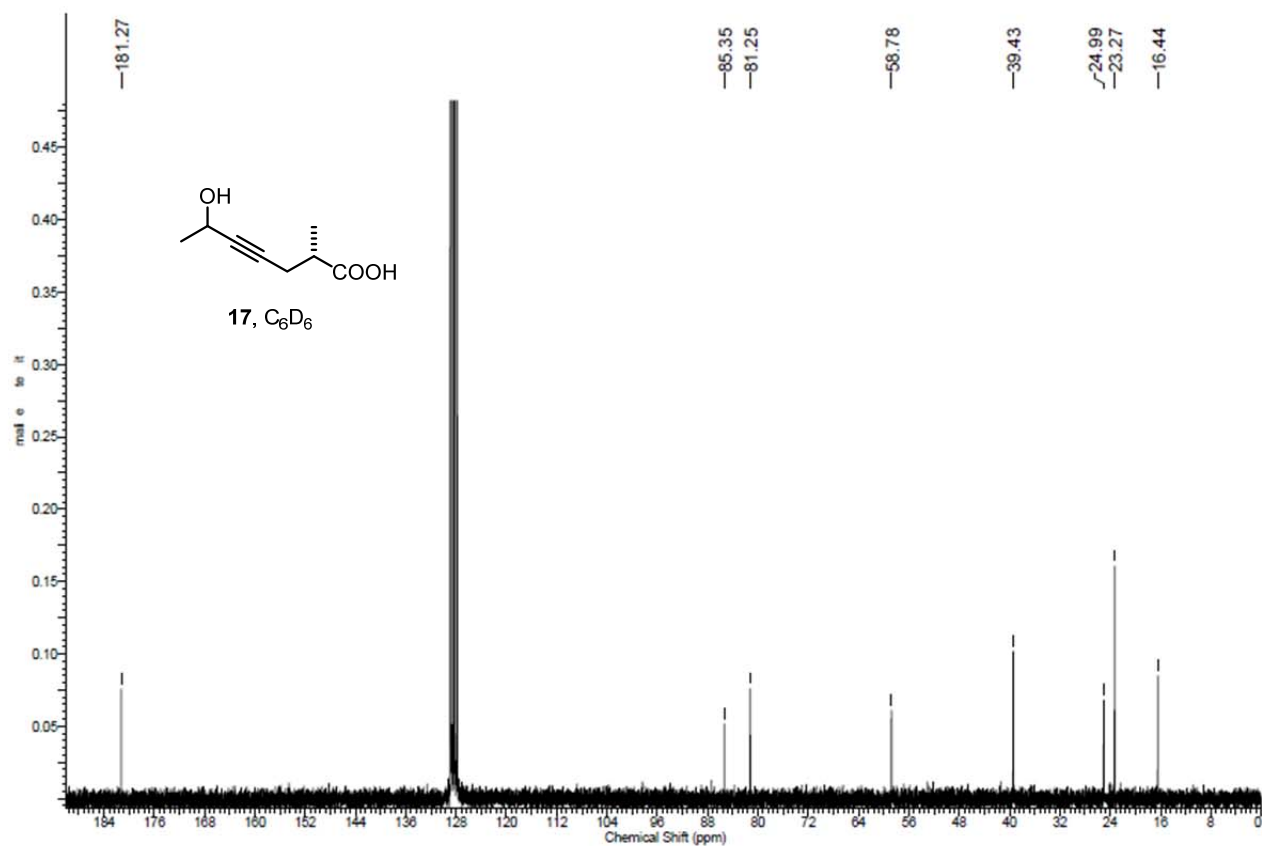

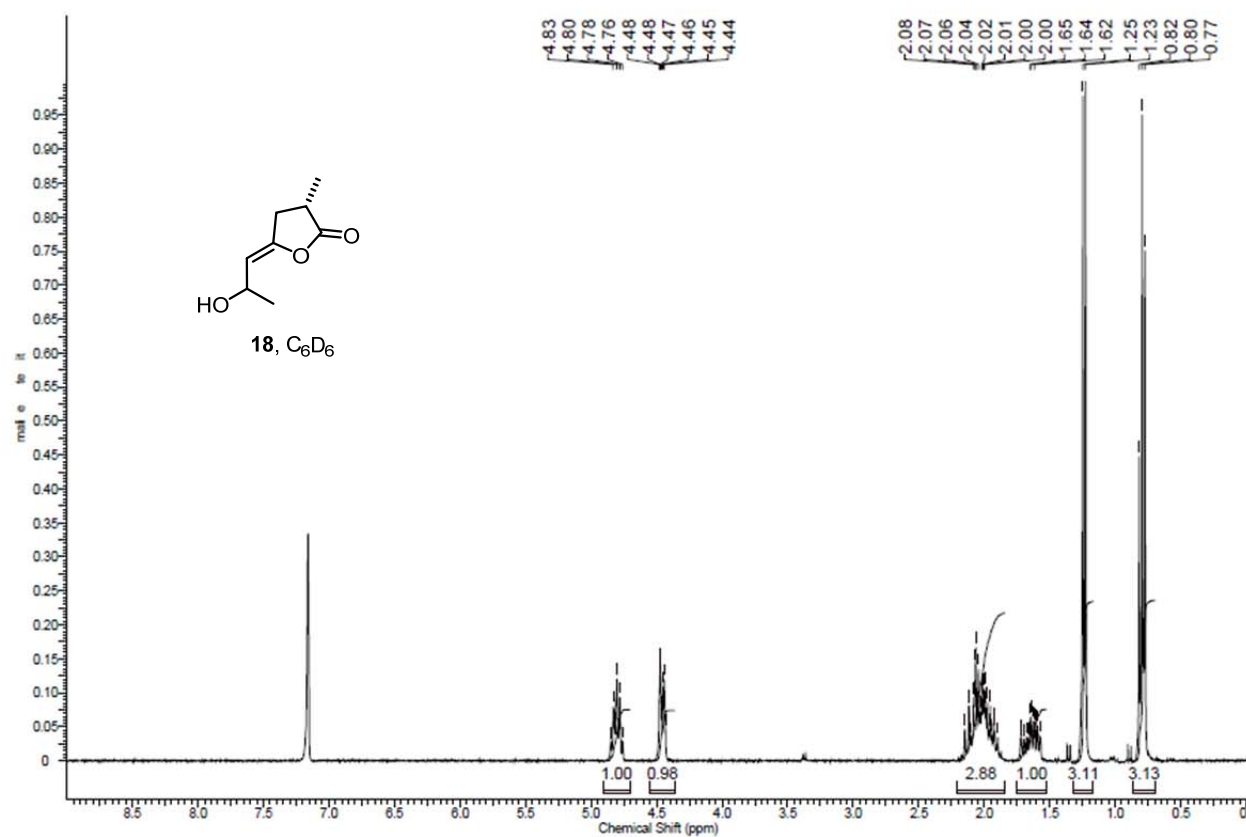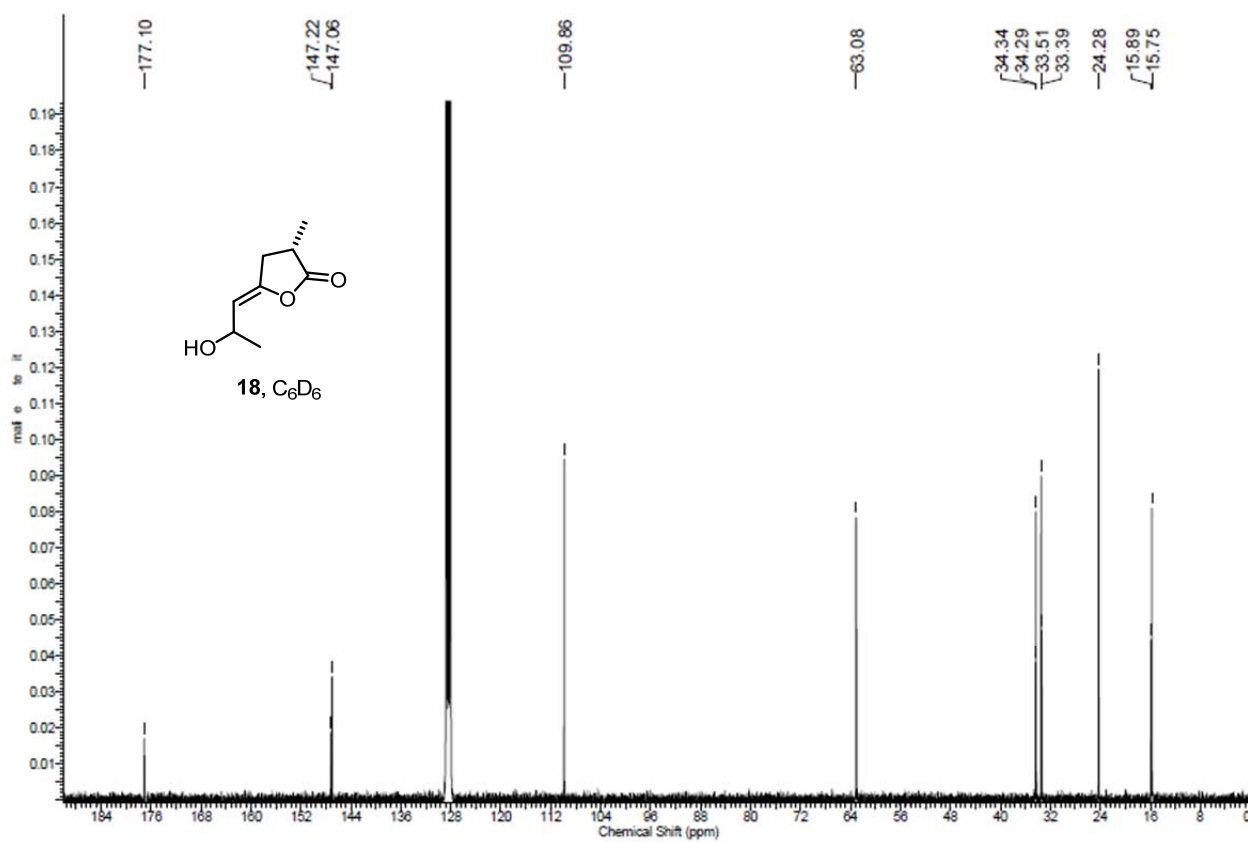

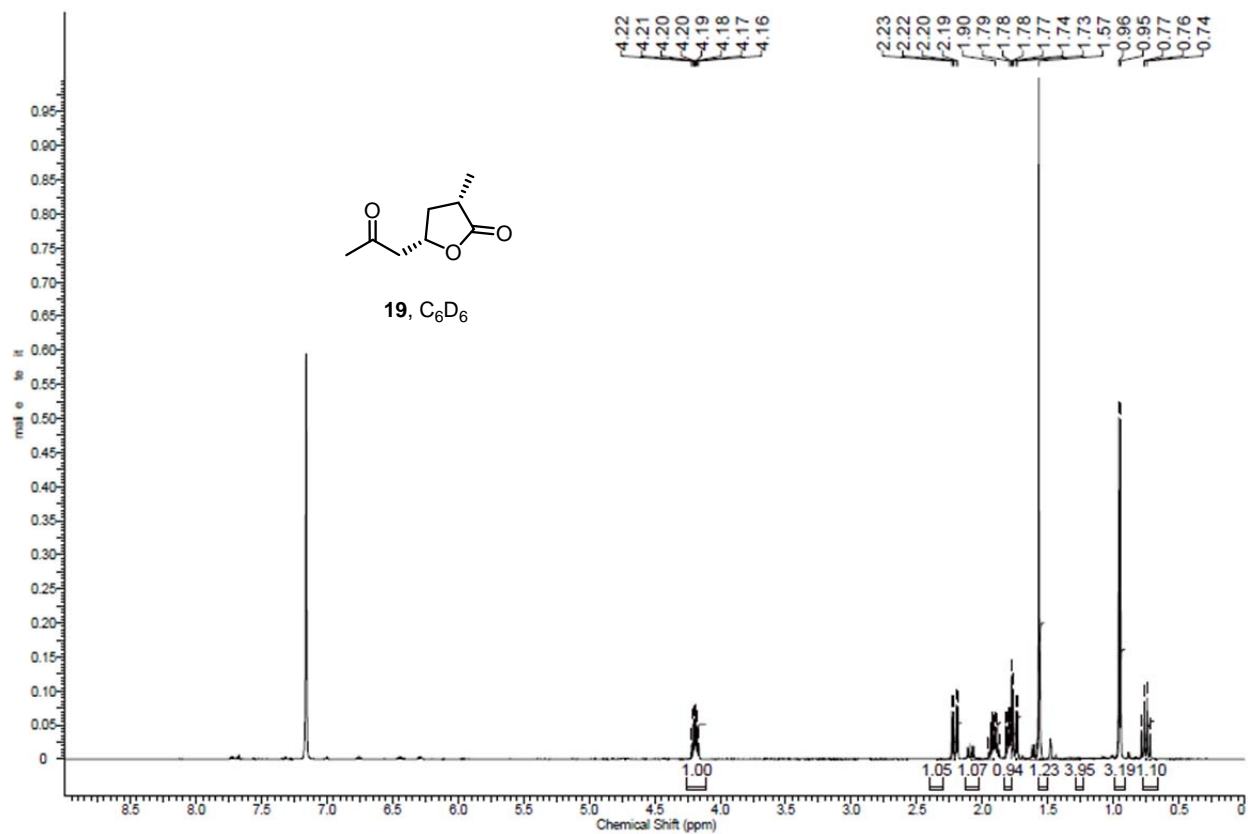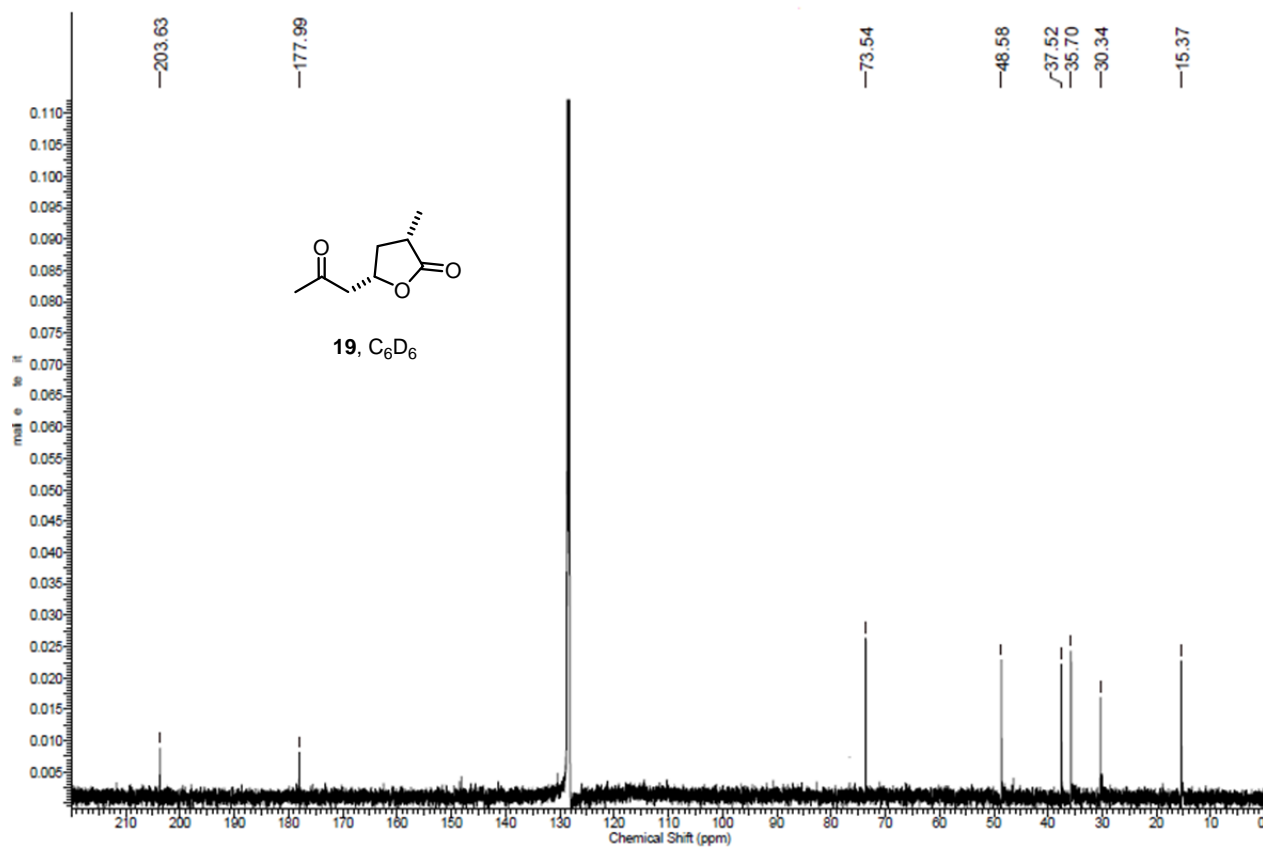

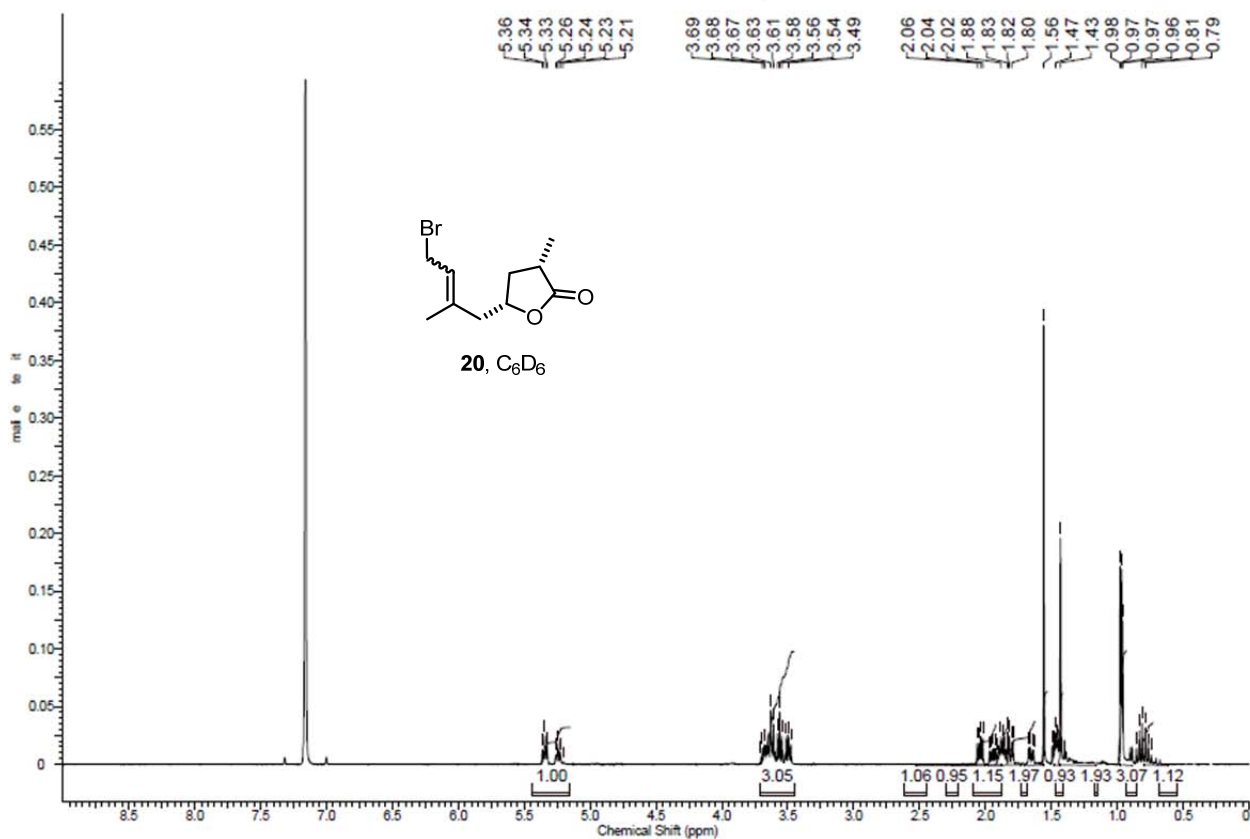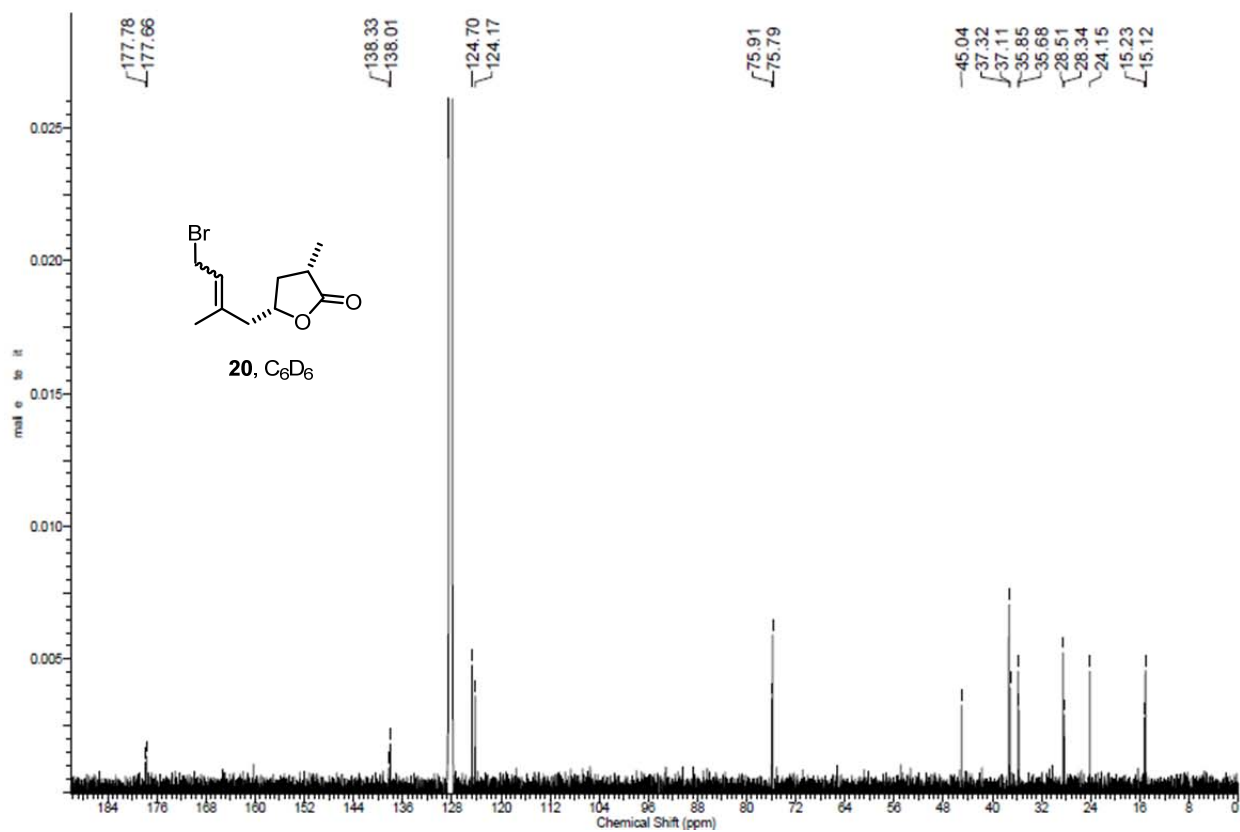

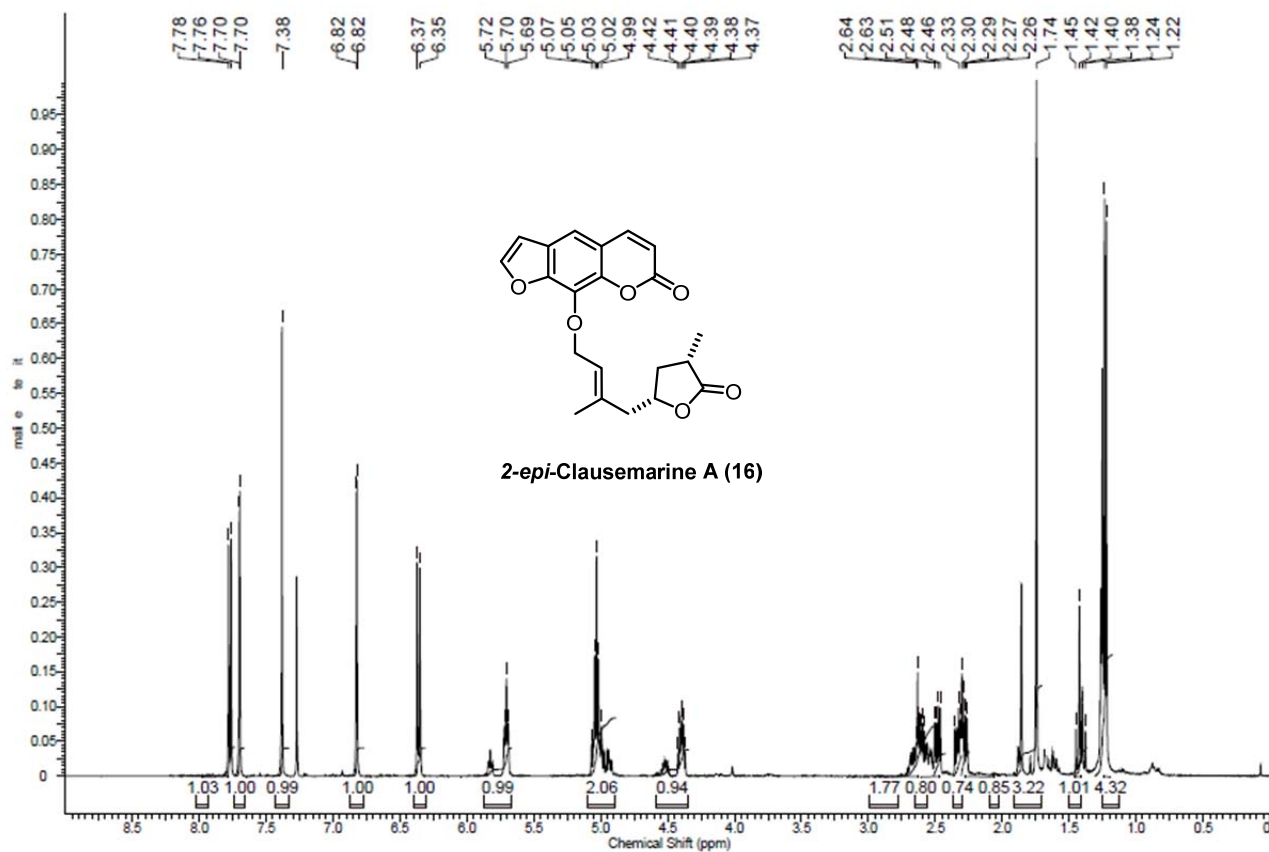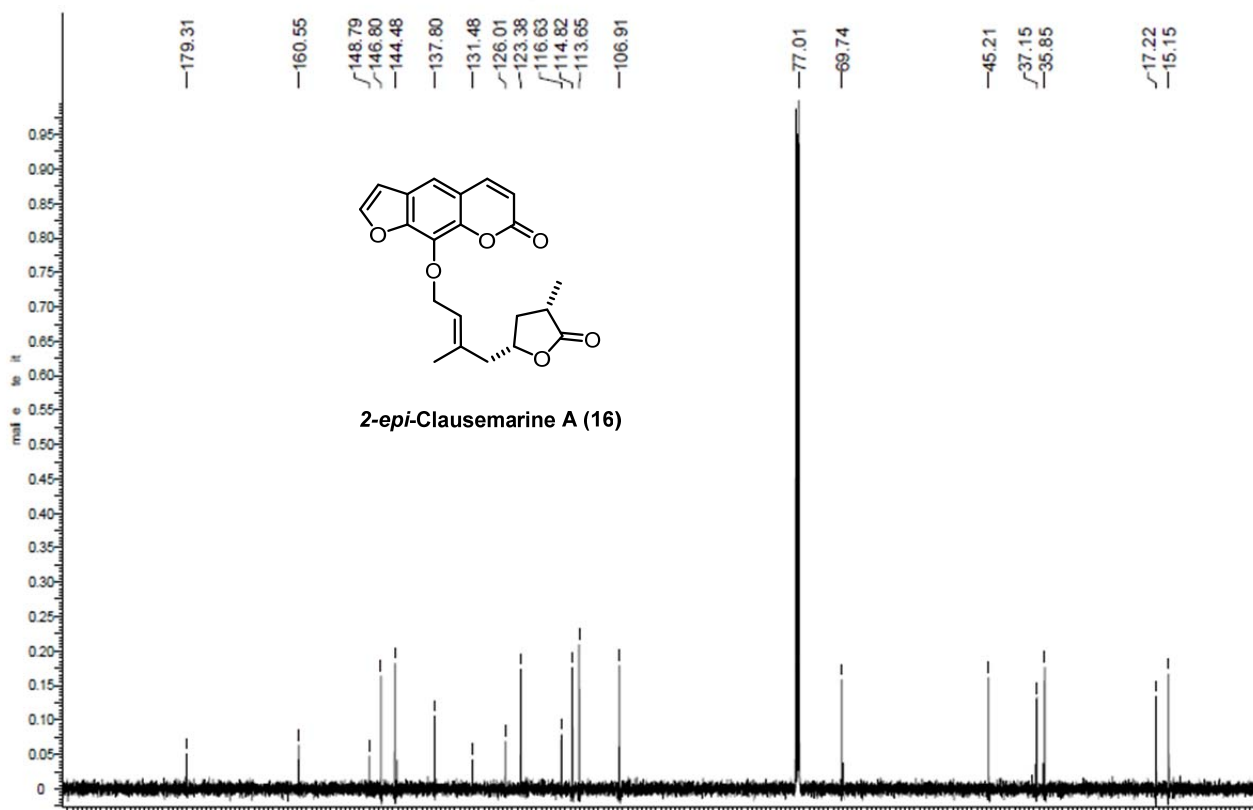

Supplement: c5ob01286d1.pdf [file c5ob01286d1.pdf]
